# Supplementary material for: Impact of Front Range sources on reactive nitrogen concentrations and deposition in Rocky Mountain National Park
Source: PeerJ. 2018 May 15;6:e4759. doi: 10.7717/peerj.4759 (PMC5958887; doi:10.7717/peerj.4759)
Supplement: Supplemental Information 1 — This files includes the hourly average data collected at Rocky Mountain National Park during FRAPPE in 2014. Meteorological data and concentrations of NH3, NOy, NO, PAN, alkyl nitrates, and VOCs used in the manuscript are included. [file peerj-06-4759-s001.csv]

Hourly average data collected at RMNP during FRAPPE 2014
.-999 indicates missing values
Jeff Collett at Colorado State University (collett@atmos.colostate.edu) should be contacted before using this data in an independent analysis
Meteorlogical data were provided by the National Park Service, addition met data can be downloaded here: https://ard-request.air-resource.com/data.aspx
NO and NOy data were provided by by the EPA. Additional data can be downloaded here: https://www.epa.gov/castnet
date	WS	WD	Temp_C	RH_percent	Rainfall_mm/HR	solar_W/m2	NH3_ppbv	NO_ppbv	NOy_ppbv	PAN_pptv	C2Cl4_ppbv	CHBr3_ppbv	MeONO2_pptv	EtONO2_pptv	i.PrONO2_pptv	n.PrONO2_pptv	2-BuONO2_pptv	3-PenONO2_pptv	2-PenONO2_pptv	ethane_pptv	i.butane_pptv	n.butane_pptv
7/10/2014 0:00	-999	-999	16.5	38	0	0	-999	0.017	0.746	-999	-999	-999	-999	-999	-999	-999	-999	-999	-999	-999	-999	-999
7/10/2014 1:00	-999	-999	15.6	41	0	0	-999	0.007	0.744	-999	-999	-999	-999	-999	-999	-999	-999	-999	-999	-999	-999	-999
7/10/2014 2:00	-999	-999	15.4	39	0	0	-999	0.02	0.581	-999	-999	-999	-999	-999	-999	-999	-999	-999	-999	-999	-999	-999
7/10/2014 3:00	-999	-999	16.3	36	0	0	-999	0.02	0.516	-999	-999	-999	-999	-999	-999	-999	-999	-999	-999	-999	-999	-999
7/10/2014 4:00	-999	-999	16	38	0	0	-999	-999	-999	-999	-999	-999	-999	-999	-999	-999	-999	-999	-999	-999	-999	-999
7/10/2014 5:00	-999	-999	15.6	39	0	3	-999	0.027	0.542	-999	-999	-999	-999	-999	-999	-999	-999	-999	-999	-999	-999	-999
7/10/2014 6:00	-999	-999	14.5	42	0	18	-999	0.055	0.642	-999	-999	-999	-999	-999	-999	-999	-999	-999	-999	-999	-999	-999
7/10/2014 7:00	-999	-999	17	40	0	271	-999	-999	-999	-999	-999	-999	-999	-999	-999	-999	-999	-999	-999	-999	-999	-999
7/10/2014 8:00	-999	-999	19.9	34	0	463	-999	0.051	0.835	-999	-999	-999	-999	-999	-999	-999	-999	-999	-999	-999	-999	-999
7/10/2014 9:00	-999	-999	21.1	31	0	646	-999	0.117	0.887	-999	-999	-999	-999	-999	-999	-999	-999	-999	-999	-999	-999	-999
7/10/2014 10:00	-999	-999	21.6	27	0	800	-999	0.061	0.749	-999	-999	-999	-999	-999	-999	-999	-999	-999	-999	-999	-999	-999
7/10/2014 11:00	-999	-999	22.2	27	0	923	-999	0.071	0.709	-999	-999	-999	-999	-999	-999	-999	-999	-999	-999	-999	-999	-999
7/10/2014 12:00	-999	-999	21.9	31	0	743	-999	0.08	1.235	-999	-999	-999	-999	-999	-999	-999	-999	-999	-999	-999	-999	-999
7/10/2014 13:00	-999	-999	20.9	34	0	261	-999	0.106	2.674	-999	-999	-999	-999	-999	-999	-999	-999	-999	-999	-999	-999	-999
7/10/2014 14:00	-999	-999	21.6	32	0	787	-999	0.378	5.286	-999	-999	-999	-999	-999	-999	-999	-999	-999	-999	-999	-999	-999
7/10/2014 15:00	-999	-999	21.2	34	0	345	-999	0.085	2.648	-999	-999	-999	-999	-999	-999	-999	-999	-999	-999	-999	-999	-999
7/10/2014 16:00	-999	-999	20.4	35	0	202	-999	0.042	1.126	-999	-999	-999	-999	-999	-999	-999	-999	-999	-999	-999	-999	-999
7/10/2014 17:00	-999	-999	21.3	35	0	473	-999	0.052	1.381	-999	-999	-999	-999	-999	-999	-999	-999	-999	-999	-999	-999	-999
7/10/2014 18:00	-999	-999	19.5	42	0	131	-999	0.064	1.643	-999	-999	-999	-999	-999	-999	-999	-999	-999	-999	-999	-999	-999
7/10/2014 19:00	-999	-999	19.3	42	0	88	-999	0.136	1.862	-999	-999	-999	-999	-999	-999	-999	-999	-999	-999	-999	-999	-999
7/10/2014 20:00	-999	-999	18.1	44	0	6	-999	0.066	1.592	-999	-999	-999	-999	-999	-999	-999	-999	-999	-999	-999	-999	-999
7/10/2014 21:00	-999	-999	17.2	49	0	0	-999	-0.021	1.241	-999	-999	-999	-999	-999	-999	-999	-999	-999	-999	-999	-999	-999
7/10/2014 22:00	-999	-999	15.7	59	0	0	-999	0.029	1.033	-999	-999	-999	-999	-999	-999	-999	-999	-999	-999	-999	-999	-999
7/10/2014 23:00	-999	-999	16.5	49	0.1	0	-999	0.031	0.809	-999	-999	-999	-999	-999	-999	-999	-999	-999	-999	-999	-999	-999
7/11/2014 0:00	-999	-999	15.2	54	0	0	-999	0.034	0.79	-999	-999	-999	-999	-999	-999	-999	-999	-999	-999	-999	-999	-999
7/11/2014 1:00	-999	-999	14.8	56	0	0	-999	0.052	0.768	-999	-999	-999	-999	-999	-999	-999	-999	-999	-999	-999	-999	-999
7/11/2014 2:00	-999	-999	13.7	60	0	0	-999	0	0.618	-999	-999	-999	-999	-999	-999	-999	-999	-999	-999	-999	-999	-999
7/11/2014 3:00	-999	-999	13.7	61	0	0	-999	0.008	0.609	-999	-999	-999	-999	-999	-999	-999	-999	-999	-999	-999	-999	-999
7/11/2014 4:00	-999	-999	13.5	61	0	0	-999	-0.004	0.698	-999	-999	-999	-999	-999	-999	-999	-999	-999	-999	-999	-999	-999
7/11/2014 5:00	-999	-999	13.4	63	0	2	-999	0.024	0.731	-999	-999	-999	-999	-999	-999	-999	-999	-999	-999	-999	-999	-999
7/11/2014 6:00	-999	-999	14	61	0	40	-999	0.011	0.753	-999	-999	-999	-999	-999	-999	-999	-999	-999	-999	-999	-999	-999
7/11/2014 7:00	-999	-999	15.3	58	0	190	-999	0.35	1.685	-999	-999	-999	-999	-999	-999	-999	-999	-999	-999	-999	-999	-999
7/11/2014 8:00	-999	-999	18.6	46	0	436	-999	0.198	1.142	-999	-999	-999	-999	-999	-999	-999	-999	-999	-999	-999	-999	-999
7/11/2014 9:00	-999	-999	20.6	37	0	498	-999	0.054	0.704	-999	-999	-999	-999	-999	-999	-999	-999	-999	-999	-999	-999	-999
7/11/2014 10:00	-999	-999	20	37	0	262	-999	0.051	0.563	-999	-999	-999	-999	-999	-999	-999	-999	-999	-999	-999	-999	-999
7/11/2014 11:00	-999	-999	19.7	40	0	318	-999	0.093	0.699	-999	-999	-999	-999	-999	-999	-999	-999	-999	-999	-999	-999	-999
7/11/2014 12:00	-999	-999	21	41	0	930	-999	0.058	1.105	-999	-999	-999	-999	-999	-999	-999	-999	-999	-999	-999	-999	-999
7/11/2014 13:00	-999	-999	19	54	0	129	-999	0.087	2.09	-999	-999	-999	-999	-999	-999	-999	-999	-999	-999	-999	-999	-999
7/11/2014 14:00	-999	-999	15.3	71	0.1	96	-999	0.057	1.416	-999	-999	-999	-999	-999	-999	-999	-999	-999	-999	-999	-999	-999
7/11/2014 15:00	-999	-999	17.7	60	0	369	-999	0.046	1.756	-999	-999	-999	-999	-999	-999	-999	-999	-999	-999	-999	-999	-999
7/11/2014 16:00	1.4	161	17	66	0.6	67	-999	0	3.244	-999	-999	-999	-999	-999	-999	-999	-999	-999	-999	-999	-999	-999
7/11/2014 17:00	0.5	292	14.3	88	0.4	23	-999	0.074	3.187	-999	-999	-999	-999	-999	-999	-999	-999	-999	-999	-999	-999	-999
7/11/2014 18:00	1.8	5	13.6	90	0.4	117	-999	0.121	2.203	456	-999	-999	-999	-999	-999	-999	-999	-999	-999	-999	-999	-999
7/11/2014 19:00	0.8	269	14.2	80	0	100	-999	0.068	1.061	289.9166667	-999	-999	-999	-999	-999	-999	-999	-999	-999	-999	-999	-999
7/11/2014 20:00	0.8	217	13.5	83	0	1	-999	0.021	1.106	138.0833333	-999	-999	-999	-999	-999	-999	-999	-999	-999	-999	-999	-999
7/11/2014 21:00	1.2	321	13.1	82	0	0	-999	0.008	1.211	79.45454545	-999	-999	-999	-999	-999	-999	-999	-999	-999	-999	-999	-999
7/11/2014 22:00	1.1	309	12.9	75	0	0	-999	0.014	0.69	58	-999	-999	-999	-999	-999	-999	-999	-999	-999	-999	-999	-999
7/11/2014 23:00	0.9	221	13.1	75	0	0	0.11590303	0.009	1.088	60.16666667	-999	-999	-999	-999	-999	-999	-999	-999	-999	-999	-999	-999
7/12/2014 0:00	0.8	39	12	88	0	0	-999	0.003	1.556	66.33333333	-999	-999	-999	-999	-999	-999	-999	-999	-999	-999	-999	-999
7/12/2014 1:00	0.8	287	11.2	90	0	0	-999	-0.004	1.207	55.09090909	-999	-999	-999	-999	-999	-999	-999	-999	-999	-999	-999	-999
7/12/2014 2:00	0.5	279	11.3	86	0	0	0.310890193	0.001	0.84	43.5	-999	-999	-999	-999	-999	-999	-999	-999	-999	-999	-999	-999
7/12/2014 3:00	0.9	296	11.8	77	0	0	0.181187502	0.003	0.527	40.33333333	-999	-999	-999	-999	-999	-999	-999	-999	-999	-999	-999	-999
7/12/2014 4:00	1.4	336	12.2	73	0	0	0.059382806	-999	-999	53.16666667	-999	-999	-999	-999	-999	-999	-999	-999	-999	-999	-999	-999
7/12/2014 5:00	1.2	345	12.6	67	0	2	-0.037108318	0.014	0.433	63	-999	-999	-999	-999	-999	-999	-999	-999	-999	-999	-999	-999
7/12/2014 6:00	1.5	329	14.2	57	0	24	-0.013602819	0.015	0.511	48.18181818	-999	-999	-999	-999	-999	-999	-999	-999	-999	-999	-999	-999
7/12/2014 7:00	1.4	342	15.7	52	0	117	0.28135888	0.025	0.563	46.27272727	-999	-999	-999	-999	-999	-999	-999	-999	-999	-999	-999	-999
7/12/2014 8:00	0.9	359	17.3	47	0	214	1.916703621	0.082	0.666	40.09090909	-999	-999	-999	-999	-999	-999	-999	-999	-999	-999	-999	-999
7/12/2014 9:00	2.4	12	20	42	0	788	3.160752038	0.123	0.68	16.28571429	-999	-999	-999	-999	-999	-999	-999	-999	-999	-999	-999	-999
7/12/2014 10:00	1	129	17.8	61	0	543	3.071957641	0.182	1.731	71.09090909	-999	-999	-999	-999	-999	-999	-999	-999	-999	-999	-999	-999
7/12/2014 11:00	2.8	145	13.3	90	0	198	1.932146055	0.334	3.54	92.44444444	-999	-999	-999	-999	-999	-999	-999	-999	-999	-999	-999	-999
7/12/2014 12:00	1.4	171	15.2	78	0	635	1.393419674	0.179	2.256	120.25	-999	-999	-999	-999	-999	-999	-999	-999	-999	-999	-999	-999
7/12/2014 13:00	2.4	151	16.7	67	0	427	1.212469933	0.035	1.49	241.7	-999	-999	-999	-999	-999	-999	-999	-999	-999	-999	-999	-999
7/12/2014 14:00	1.5	187	13.9	86	7.8	159	1.64197251	0.04	1.383	324.1818182	-999	-999	-999	-999	-999	-999	-999	-999	-999	-999	-999	-999
7/12/2014 15:00	2.3	167	14.3	88	0	536	1.335882799	0.075	1.478	207.1666667	-999	-999	-999	-999	-999	-999	-999	-999	-999	-999	-999	-999
7/12/2014 16:00	1.1	189	13.5	92	1.1	112	1.205115867	0.036	1.708	182.5833333	-999	-999	-999	-999	-999	-999	-999	-999	-999	-999	-999	-999
7/12/2014 17:00	1.2	329	12.9	90	0.7	166	1.075682201	0.074	1.106	145.3076923	-999	-999	-999	-999	-999	-999	-999	-999	-999	-999	-999	-999
7/12/2014 18:00	1.1	321	13.4	88	0	139	0.659234354	0.108	0.943	76.45454545	-999	-999	-999	-999	-999	-999	-999	-999	-999	-999	-999	-999
7/12/2014 19:00	0.6	323	13.4	88	0	48	0.411209685	0.079	1.043	128.9166667	-999	-999	-999	-999	-999	-999	-999	-999	-999	-999	-999	-999
7/12/2014 20:00	1.1	296	13	86	0	2	0.27263875	0.031	0.815	95.16666667	-999	-999	-999	-999	-999	-999	-999	-999	-999	-999	-999	-999
7/12/2014 21:00	0.7	327	12.2	88	0	0	0.101986693	0.019	0.971	61.09090909	-999	-999	-999	-999	-999	-999	-999	-999	-999	-999	-999	-999
7/12/2014 22:00	1	290	10.7	89	0	0	-0.039788645	0.014	0.772	50.16666667	-999	-999	-999	-999	-999	-999	-999	-999	-999	-999	-999	-999
7/12/2014 23:00	1	322	9.6	89	0	0	-0.204014732	0.009	0.437	52.27272727	-999	-999	-999	-999	-999	-999	-999	-999	-999	-999	-999	-999
7/13/2014 0:00	1.3	312	9.2	88	0	0	-999	0.008	0.438	32.91666667	-999	-999	-999	-999	-999	-999	-999	-999	-999	-999	-999	-999
7/13/2014 1:00	1.4	300	8.9	88	0	0	-999	0.004	0.379	63.81818182	-999	-999	-999	-999	-999	-999	-999	-999	-999	-999	-999	-999
7/13/2014 2:00	1.8	282	8.6	84	0	0	0.259608937	0.005	0.261	60.18181818	-999	-999	-999	-999	-999	-999	-999	-999	-999	-999	-999	-999
7/13/2014 3:00	1.5	323	7.7	82	0	0	0.104743581	0.007	0.118	37.55555556	-999	-999	-999	-999	-999	-999	-999	-999	-999	-999	-999	-999
7/13/2014 4:00	1.8	307	7.5	76	0	0	-0.020327411	0.018	0.108	48.81818182	-999	-999	-999	-999	-999	-999	-999	-999	-999	-999	-999	-999
7/13/2014 5:00	1.8	327	7.2	76	0	3	-0.148852166	-0.008	0.125	42.72727273	-999	-999	-999	-999	-999	-999	-999	-999	-999	-999	-999	-999
7/13/2014 6:00	1.2	314	6.9	80	0	22	-0.216434108	0.086	0.271	39.55555556	-999	-999	-999	-999	-999	-999	-999	-999	-999	-999	-999	-999
7/13/2014 7:00	0.5	354	9.1	84	0	276	-0.275861689	0.402	0.898	67.4	-999	-999	-999	-999	-999	-999	-999	-999	-999	-999	-999	-999
7/13/2014 8:00	0.9	101	13.5	65	0	451	-0.197747307	0.502	1.368	47	-999	-999	-999	-999	-999	-999	-999	-999	-999	-999	-999	-999
7/13/2014 9:00	1.4	111	15.5	56	0	635	0.485085432	0.034	0.525	78.69230769	-999	-999	-999	-999	-999	-999	-999	-999	-999	-999	-999	-999
7/13/2014 10:00	1.9	134	17	53	0	794	0.982495891	0.058	0.59	103.1666667	-999	-999	-999	-999	-999	-999	-999	-999	-999	-999	-999	-999
7/13/2014 11:00	3	133	17.4	57	0	893	0.959260838	0.08	0.836	131.8333333	-999	-999	-999	-999	-999	-999	-999	-999	-999	-999	-999	-999
7/13/2014 12:00	2.7	140	17	62	0	619	0.807699922	0.076	1.004	170.2727273	-999	-999	-999	-999	-999	-999	-999	-999	-999	-999	-999	-999
7/13/2014 13:00	2.8	147	17	65	0	697	0.750982665	0.071	1.211	224.0833333	-999	-999	-999	-999	-999	-999	-999	-999	-999	-999	-999	-999
7/13/2014 14:00	2.2	148	17.1	65	0	474	0.669440678	0.059	1.324	230.1666667	-999	-999	-999	-999	-999	-999	-999	-999	-999	-999	-999	-999
7/13/2014 15:00	2	143	17.7	63	0	437	0.67892612	0.04	1.525	265.5833333	-999	-999	-999	-999	-999	-999	-999	-999	-999	-999	-999	-999
7/13/2014 16:00	2.6	146	17.6	64	0	398	0.708129519	0.051	2.099	305.8181818	-999	-999	-999	-999	-999	-999	-999	-999	-999	-999	-999	-999
7/13/2014 17:00	2.3	161	16.9	63	0	219	0.745824545	0.049	2.135	343.5	-999	-999	-999	-999	-999	-999	-999	-999	-999	-999	-999	-999
7/13/2014 18:00	1.8	173	16.3	63	0	187	0.841989216	0.032	2.242	314.4166667	-999	-999	-999	-999	-999	-999	-999	-999	-999	-999	-999	-999
7/13/2014 19:00	0.5	297	14.6	70	0	51	0.978942627	0.006	1.883	271.9166667	-999	-999	-999	-999	-999	-999	-999	-999	-999	-999	-999	-999
7/13/2014 20:00	0.6	243	12.9	78	0	6	0.871750114	0.02	2.13	213.0833333	-999	-999	-999	-999	-999	-999	-999	-999	-999	-999	-999	-999
7/13/2014 21:00	1	300	11.5	82	0	0	0.671371991	0.014	1.965	119.3636364	-999	-999	-999	-999	-999	-999	-999	-999	-999	-999	-999	-999
7/13/2014 22:00	0.9	293	10.9	80	0	0	0.481499924	0.032	1.201	94.25	-999	-999	-999	-999	-999	-999	-999	-999	-999	-999	-999	-999
7/13/2014 23:00	0.6	299	10.2	80	0	0	0.326683402	0.018	0.817	108.8333333	-999	-999	-999	-999	-999	-999	-999	-999	-999	-999	-999	-999
7/14/2014 0:00	1.3	302	10.3	79	0	0	-999	0.018	0.68	72.75	-999	-999	-999	-999	-999	-999	-999	-999	-999	-999	-999	-999
7/14/2014 1:00	1.5	290	10.5	77	0	0	-999	-0.022	0.579	69.90909091	-999	-999	-999	-999	-999	-999	-999	-999	-999	-999	-999	-999
7/14/2014 2:00	1.5	294	10.5	75	0	0	0.290298473	0.001	0.54	64.5	-999	-999	-999	-999	-999	-999	-999	-999	-999	-999	-999	-999
7/14/2014 3:00	1.6	287	10.2	75	0	0	0.249311137	0.002	0.521	72.33333333	-999	-999	-999	-999	-999	-999	-999	-999	-999	-999	-999	-999
7/14/2014 4:00	1	300	10.8	74	0	0	0.168336716	-999	-999	56.83333333	-999	-999	-999	-999	-999	-999	-999	-999	-999	-999	-999	-999
7/14/2014 5:00	1.2	309	9.6	74	0	3	0.116398583	0.008	0.404	75.27272727	-999	-999	-999	-999	-999	-999	-999	-999	-999	-999	-999	-999
7/14/2014 6:00	0.8	308	8.6	80	0	19	0.079027405	0.024	0.554	49	-999	-999	-999	-999	-999	-999	-999	-999	-999	-999	-999	-999
7/14/2014 7:00	0.5	1	11.1	77	0	249	0.052610192	-999	-999	54.41666667	-999	-999	-999	-999	-999	-999	-999	-999	-999	-999	-999	-999
7/14/2014 8:00	0.9	119	14.6	62	0	446	1.597265221	0.118	1.25	105.6666667	-999	-999	-999	-999	-999	-999	-999	-999	-999	-999	-999	-999
7/14/2014 9:00	1.7	127	16.2	53	0	633	2.250824544	0.074	0.974	134	-999	-999	-999	-999	-999	-999	-999	-999	-999	-999	-999	-999
7/14/2014 10:00	2.5	143	17	48	0	557	1.886395127	0.072	0.891	-999	-999	-999	-999	-999	-999	-999	-999	-999	-999	-999	-999	-999
7/14/2014 11:00	2.8	136	16.9	47	0	648	1.31678079	0.073	1.021	-999	-999	-999	-999	-999	-999	-999	-999	-999	-999	-999	-999	-999
7/14/2014 12:00	2.6	117	16.1	49	0	391	1.053581825	0.092	1.415	-999	-999	-999	-999	-999	-999	-999	-999	-999	-999	-999	-999	-999
7/14/2014 13:00	1.6	153	16.3	49	0	772	0.895799429	0.097	1.912	-999	-999	-999	-999	-999	-999	-999	-999	-999	-999	-999	-999	-999
7/14/2014 14:00	1.1	351	16.1	55	0	490	1.166462666	0.122	2.018	-999	-999	-999	-999	-999	-999	-999	-999	-999	-999	-999	-999	-999
7/14/2014 15:00	1.8	156	16.9	53	0	392	1.393282862	0.085	2.093	746	-999	-999	-999	-999	-999	-999	-999	-999	-999	-999	-999	-999
7/14/2014 16:00	2.8	133	16	58	0	312	1.261065942	0.046	2.222	902.3636364	-999	-999	-999	-999	-999	-999	-999	-999	-999	-999	-999	-999
7/14/2014 17:00	1.9	153	15.2	62	0.1	269	1.166528927	0.077	2.435	717.5833333	-999	-999	-999	-999	-999	-999	-999	-999	-999	-999	-999	-999
7/14/2014 18:00	1.8	162	14.7	62	0	92	1.515356868	0.056	2.321	701.5	-999	-999	-999	-999	-999	-999	-999	-999	-999	-999	-999	-999
7/14/2014 19:00	1.9	175	13.4	73	0	27	1.63639863	0.016	1.989	518.5	-999	-999	-999	-999	-999	-999	-999	-999	-999	-999	-999	-999
7/14/2014 20:00	1.2	177	12.8	76	0	2	1.51175241	0.009	1.938	317.9090909	-999	-999	-999	-999	-999	-999	-999	-999	-999	-999	-999	-999
7/14/2014 21:00	0.9	178	12.5	79	0	0	1.46795352	0.001	1.783	222.5	-999	-999	-999	-999	-999	-999	-999	-999	-999	-999	-999	-999
7/14/2014 22:00	1.5	182	11.2	87	0	0	1.533634182	0.024	2.273	216.25	-999	-999	-999	-999	-999	-999	-999	-999	-999	-999	-999	-999
7/14/2014 23:00	1.6	161	10.1	90	0	0	1.551769474	0.019	1.871	167.3333333	-999	-999	-999	-999	-999	-999	-999	-999	-999	-999	-999	-999
7/15/2014 0:00	0.5	159	10	89	0	0	-999	0.003	1.703	170.25	-999	-999	-999	-999	-999	-999	-999	-999	-999	-999	-999	-999
7/15/2014 1:00	0.7	339	9.8	89	0	0	-999	0.025	1.776	148.3636364	-999	-999	-999	-999	-999	-999	-999	-999	-999	-999	-999	-999
7/15/2014 2:00	0.9	290	9	89	0	0	0.952830682	0.014	1.4	93	-999	-999	-999	-999	-999	-999	-999	-999	-999	-999	-999	-999
7/15/2014 3:00	1	301	8.4	87	0	0	0.844795391	-0.001	1.004	66.25	-999	-999	-999	-999	-999	-999	-999	-999	-999	-999	-999	-999
7/15/2014 4:00	1	303	8.3	84	0	0	0.67659426	-0.003	0.789	82.66666667	-999	-999	-999	-999	-999	-999	-999	-999	-999	-999	-999	-999
7/15/2014 5:00	0.9	305	7.3	88	0	2	0.549344616	0.014	0.812	52.18181818	-999	-999	-999	-999	-999	-999	-999	-999	-999	-999	-999	-999
7/15/2014 6:00	0.9	281	7.7	84	0	16	0.421468404	0.05	0.732	58.75	-999	-999	-999	-999	-999	-999	-999	-999	-999	-999	-999	-999
7/15/2014 7:00	1.3	2	13.2	60	0	259	0.797814997	0.14	0.95	53.72727273	-999	-999	-999	-999	-999	-999	-999	-999	-999	-999	-999	-999
7/15/2014 8:00	2.3	24	17.1	43	0	449	3.988782356	0.265	1.297	108.5833333	-999	-999	-999	-999	-999	-999	-999	-999	-999	-999	-999	-999
7/15/2014 9:00	2.4	27	18.6	38	0	620	3.675321829	0.454	1.431	139.9090909	-999	-999	-999	-999	-999	-999	-999	-999	-999	-999	-999	-999
7/15/2014 10:00	1.6	32	19.9	33	0	784	2.828143366	0.208	1.207	155.9090909	-999	-999	-999	-999	-999	-999	-999	-999	-999	-999	-999	-999
7/15/2014 11:00	3	159	19	47	0	704	2.219644241	0.138	1.385	-999	-999	-999	-999	-999	-999	-999	-999	-999	-999	-999	-999	-999
7/15/2014 12:00	3.8	153	18.1	50	0	765	1.582306966	0.132	1.735	414.2	-999	-999	-999	-999	-999	-999	-999	-999	-999	-999	-999	-999
7/15/2014 13:00	3.1	145	17	56	0	464	1.205776136	0.133	2.244	425.4166667	-999	-999	-999	-999	-999	-999	-999	-999	-999	-999	-999	-999
7/15/2014 14:00	1.3	153	15.5	64	0.3	263	1.0310303	0.086	2.369	443.5714286	-999	-999	-999	-999	-999	-999	-999	-999	-999	-999	-999	-999
7/15/2014 15:00	1	178	13.7	82	1.8	224	1.027142348	0.141	2.027	538.75	-999	-999	-999	-999	-999	-999	-999	-999	-999	-999	-999	-999
7/15/2014 16:00	0.8	159	14.6	79	0	370	0.939012721	0.183	2.131	575.1666667	-999	-999	-999	-999	-999	-999	-999	-999	-999	-999	-999	-999
7/15/2014 17:00	1.5	182	13.6	77	0	202	0.907769838	0.069	1.413	484.5	-999	-999	-999	-999	-999	-999	-999	-999	-999	-999	-999	-999
7/15/2014 18:00	0.9	219	12.8	80	0	38	0.780121004	0.037	1.5	411.2727273	-999	-999	-999	-999	-999	-999	-999	-999	-999	-999	-999	-999
7/15/2014 19:00	2.9	322	12	69	1	8	0.680541569	0.043	0.682	193.6666667	-999	-999	-999	-999	-999	-999	-999	-999	-999	-999	-999	-999
7/15/2014 20:00	0.9	325	11.9	64	0	6	0.498917918	0.048	0.676	109.1666667	-999	-999	-999	-999	-999	-999	-999	-999	-999	-999	-999	-999
7/15/2014 21:00	0.6	270	14	53	0.1	0	0.286567492	0.012	0.607	72.63636364	-999	-999	-999	-999	-999	-999	-999	-999	-999	-999	-999	-999
7/15/2014 22:00	0.2	225	10.1	78	0	0	0.203910708	-0.002	0.877	57.58333333	-999	-999	-999	-999	-999	-999	-999	-999	-999	-999	-999	-999
7/15/2014 23:00	1.9	341	10.2	75	0	0	0.187555536	0.026	1.16	53	-999	-999	-999	-999	-999	-999	-999	-999	-999	-999	-999	-999
7/16/2014 0:00	1.1	310	10.4	77	0.1	0	-999	0.011	1.471	75.33333333	-999	-999	-999	-999	-999	-999	-999	-999	-999	-999	-999	-999
7/16/2014 1:00	1.1	280	8.9	86	0	0	-999	0.033	1.116	52.84210526	-999	-999	-999	-999	-999	-999	-999	-999	-999	-999	-999	-999
7/16/2014 2:00	2.1	331	12	64	0.2	0	0.364121781	-0.004	0.537	27.53333333	-999	-999	-999	-999	-999	-999	-999	-999	-999	-999	-999	-999
7/16/2014 3:00	2	341	11.6	65	0	0	0.335654277	0	0.629	51.5	-999	-999	-999	-999	-999	-999	-999	-999	-999	-999	-999	-999
7/16/2014 4:00	0.4	171	9.4	80	0	0	0.257383922	-999	-999	38.16666667	-999	-999	-999	-999	-999	-999	-999	-999	-999	-999	-999	-999
7/16/2014 5:00	0.4	258	7.3	93	0	1	0.23009603	0.017	1.664	51.58333333	-999	-999	-999	-999	-999	-999	-999	-999	-999	-999	-999	-999
7/16/2014 6:00	0.6	268	7.3	93	0	19	0.227282082	0.064	1.174	35	-999	-999	-999	-999	-999	-999	-999	-999	-999	-999	-999	-999
7/16/2014 7:00	2.2	326	14.2	62	0	245	0.182866257	0.143	0.992	46.3	-999	-999	-999	-999	-999	-999	-999	-999	-999	-999	-999	-999
7/16/2014 8:00	2.1	18	15.2	56	0	467	0.507698734	0.408	1.84	93.72727273	-999	-999	-999	-999	-999	-999	-999	-999	-999	-999	-999	-999
7/16/2014 9:00	1.3	101	14.4	65	0	512	1.787260168	0.19	1.427	56.18181818	-999	-999	-999	-999	-999	-999	-999	-999	-999	-999	-999	-999
7/16/2014 10:00	2.5	148	13.3	77	0	688	1.815100333	0.219	1.714	296	-999	-999	-999	-999	-999	-999	-999	-999	-999	-999	-999	-999
7/16/2014 11:00	2.9	149	14.4	70	0	599	1.46507249	0.118	1.393	-999	-999	-999	-999	-999	-999	-999	-999	-999	-999	-999	-999	-999
7/16/2014 12:00	2.6	150	14.2	69	0	396	1.191124312	0.098	1.519	-999	-999	-999	-999	-999	-999	-999	-999	-999	-999	-999	-999	-999
7/16/2014 13:00	0.6	217	12	83	0	45	1.168271042	0.092	2.411	-999	-999	-999	-999	-999	-999	-999	-999	-999	-999	-999	-999	-999
7/16/2014 14:00	0.5	175	11.1	89	0.6	107	1.23933401	0.127	2.915	-999	-999	-999	-999	-999	-999	-999	-999	-999	-999	-999	-999	-999
7/16/2014 15:00	0.4	159	11	91	1.1	167	1.159550551	0.317	3.3	585.375	-999	-999	-999	-999	-999	-999	-999	-999	-999	-999	-999	-999
7/16/2014 16:00	1.2	160	10.5	93	0.5	75	0.883885122	0.093	2.097	403.1818182	-999	-999	-999	-999	-999	-999	-999	-999	-999	-999	-999	-999
7/16/2014 17:00	0.7	359	10.3	93	0.8	58	0.687616324	0.19	2.244	290.8333333	-999	-999	-999	-999	-999	-999	-999	-999	-999	-999	-999	-999
7/16/2014 18:00	1.1	350	9.4	88	1.4	44	0.548240685	0.239	2.071	267.25	-999	-999	-999	-999	-999	-999	-999	-999	-999	-999	-999	-999
7/16/2014 19:00	1.5	345	8.9	92	0.2	22	0.396280095	0.118	1.606	183.5833333	-999	-999	-999	-999	-999	-999	-999	-999	-999	-999	-999	-999
7/16/2014 20:00	0.4	191	8.8	93	0.1	1	0.255586103	0.014	1.156	224.9090909	-999	-999	-999	-999	-999	-999	-999	-999	-999	-999	-999	-999
7/16/2014 21:00	0.4	286	8.5	93	0	0	0.135544259	0.017	1.375	109.4166667	-999	-999	-999	-999	-999	-999	-999	-999	-999	-999	-999	-999
7/16/2014 22:00	0.6	288	6.9	93	0	0	0.060067538	0.246	2.084	66.18181818	-999	-999	-999	-999	-999	-999	-999	-999	-999	-999	-999	-999
7/16/2014 23:00	0.7	310	5.9	93	0	0	0.018685814	0.055	0.748	27.16666667	-999	-999	-999	-999	-999	-999	-999	-999	-999	-999	-999	-999
7/17/2014 0:00	1	293	5.7	93	0	0	-999	0.037	0.643	39	-999	-999	-999	-999	-999	-999	-999	-999	-999	-999	-999	-999
7/17/2014 1:00	1.3	297	5.7	93	0	0	-999	0.012	0.403	50.66666667	-999	-999	-999	-999	-999	-999	-999	-999	-999	-999	-999	-999
7/17/2014 2:00	1.2	285	5.7	93	0	0	0.105977778	0.008	0.331	42.45454545	-999	-999	-999	-999	-999	-999	-999	-999	-999	-999	-999	-999
7/17/2014 3:00	0.8	305	5.6	93	0	0	0.115916338	0.028	0.511	44.8	-999	-999	-999	-999	-999	-999	-999	-999	-999	-999	-999	-999
7/17/2014 4:00	0.9	317	4.5	93	0	0	0.087624155	0.086	0.725	43.18181818	-999	-999	-999	-999	-999	-999	-999	-999	-999	-999	-999	-999
7/17/2014 5:00	0.6	297	3.9	93	0	2	0.064874208	0.124	0.677	36.72727273	-999	-999	-999	-999	-999	-999	-999	-999	-999	-999	-999	-999
7/17/2014 6:00	0.7	300	3.9	93	0	16	0.039763742	0.537	1.242	34.16666667	-999	-999	-999	-999	-999	-999	-999	-999	-999	-999	-999	-999
7/17/2014 7:00	0.3	359	6.3	93	0	240	0.00298034	1.147	2.466	40.25	-999	-999	-999	-999	-999	-999	-999	-999	-999	-999	-999	-999
7/17/2014 8:00	0.8	103	9.9	82	0	451	-0.006702196	0.17	0.904	86.5	-999	-999	-999	-999	-999	-999	-999	-999	-999	-999	-999	-999
7/17/2014 9:00	1.5	126	11.5	75	0	662	0.143851779	0.059	0.643	114.7272727	-999	-999	-999	-999	-999	-999	-999	-999	-999	-999	-999	-999
7/17/2014 10:00	2.1	149	12.6	73	0	736	0.505251711	0.086	0.649	171.3846154	2	0.43	6.38	3.42	9.94	2.15	8.47	2.01	2.79	1375.9	75	172
7/17/2014 11:00	2.2	164	13	73	0	568	0.685284225	0.071	0.798	234.5	2.17	0.541	7.5	3.7	11.2	2.22	10.1	3.55	3.4	1655	112.2	275.7
7/17/2014 12:00	2.4	154	14	70	0	691	0.665740066	0.21	1.767	249.5833333	-999	-999	8.22	-999	-999	-999	-999	-999	-999	2015.4	155.3	410.5
7/17/2014 13:00	2.4	160	14.1	70	0	591	0.554873056	0.169	2.077	332.2727273	-999	-999	-999	-999	-999	-999	-999	-999	-999	-999	-999	-999
7/17/2014 14:00	2.2	161	14.1	71	0	441	0.511361085	0.078	1.892	560.0833333	2.75	0.305	10.51	6.27	17.6	5.18	22.25	6.37	9.42	2766.9	238.7	639.5
7/17/2014 15:00	2.3	160	13.6	75	0	270	0.4913471	0.033	2.064	544.5	3.02	0.247	9.44	5.7	22.39	4.94	31.59	8.89	12.74	3836.3	362.7	975.6
7/17/2014 16:00	1.7	195	13	80	0.1	271	0.477908611	0.036	2.212	452.4166667	3.16	0.246	8.36	9.27	27.39	4.17	29.81	11.87	13.73	3823.6	432.3	1145.1
7/17/2014 17:00	1.6	158	14.2	73	0	385	0.482039185	0.067	2.004	354.4166667	3.41	0.303	7.15	9.18	25.48	4.3	35.12	9.52	12.31	3890.9	368.2	960.6
7/17/2014 18:00	1.7	153	13.3	76	0	82	0.489113341	0.06	2.225	403.7272727	3.66	0.36	8.24	8.45	31	8.73	47.6	12.63	19.15	4287	445.5	1148.4
7/17/2014 19:00	0.9	184	12.3	81	0	35	0.457072239	0.006	2.129	353.5833333	3.66	-999	7.34	7	34.53	6.05	46.25	13.21	18.69	5293.6	476.1	1213.8
7/17/2014 20:00	0.6	250	10.8	87	0	5	0.434181744	0.015	1.8	189.6666667	-999	-999	-999	-999	-999	-999	-999	-999	-999	-999	-999	-999
7/17/2014 21:00	0.5	297	9.3	91	0	0	0.397182552	0.125	1.845	87.5	-999	-999	-999	-999	-999	-999	-999	-999	-999	-999	-999	-999
7/17/2014 22:00	0.9	300	8.5	91	0	0	0.355767679	0.058	1.211	53	3.56	-999	4.74	7.2	31.67	6.9	41.59	14.25	16.76	-999	-999	-999
7/17/2014 23:00	1.2	310	8.2	86	0	0	0.295784586	0.015	0.794	70.72727273	2.56	0.435	5.1	5.1	18.07	3.6	24.27	5.68	7.85	-999	-999	-999
7/18/2014 0:00	0.7	276	8	82	0	0	-999	0.023	0.639	41.63636364	-999	-999	-999	-999	-999	-999	-999	-999	-999	-999	-999	-999
7/18/2014 1:00	0.9	290	8.1	75	0	0	-999	0.014	0.369	54.5	1.61	0.368	4.22	3.19	8.82	1.65	7.54	1.62	0.13	-999	-999	-999
7/18/2014 2:00	0.9	309	9.4	62	0	0	0.180969621	0.018	0.411	41.77777778	1.81	0.358	4.83	2.63	7.47	1.31	7.37	1.49	1.75	1279.1	62.2	131
7/18/2014 3:00	1.1	316	11.8	48	0	0	0.146688454	-0.003	0.525	45.3	1.58	0.27	4.49	2.6	6.61	1.09	6.07	1.31	1.24	-999	-999	-999
7/18/2014 4:00	1.6	332	13.3	42	0	0	0.108827505	-999	-999	57.5	1.76	0.254	5.9	3.74	8.88	1.61	7.2	1.7	1.69	-999	-999	-999
7/18/2014 5:00	1.9	321	14.4	38	0	2	0.073258397	0.006	0.646	70.16666667	1.57	0.31	5.68	2.96	7.99	1.52	5.92	1.29	1.76	-999	-999	-999
7/18/2014 6:00	1.9	326	14.8	38	0	25	0.065716922	0.133	0.992	71.33333333	1.59	0.323	6.48	2.85	7.86	2.11	6.02	1.42	1.69	1677.8	106.4	152.2
7/18/2014 7:00	1.8	336	16.1	39	0	256	0.074062236	-999	-999	79.09090909	1.55	0.36	6.21	3.12	8.95	2.31	6.71	1.73	2.26	1663.3	124.9	291.2
7/18/2014 8:00	1.6	325	17.8	35	0	360	0.270656143	0.363	2.027	118.9166667	1.76	0.348	5.83	2.91	7.83	1.22	5.01	1.61	1.83	1968.8	109.4	175.4
7/18/2014 9:00	2.6	313	17.3	37	0	317	0.650842091	0.184	1.275	149.6666667	1.66	0.322	6.56	3.16	7.08	1.27	3.98	0.95	1.32	1482.6	85.9	132.9
7/18/2014 10:00	3.3	318	15.5	46	0.6	164	0.696792846	0.201	1.283	277.3333333	1.68	0.417	6.06	3.52	6.24	0.8	4.69	0.98	1.41	1491.1	81.4	140.8
7/18/2014 11:00	1.9	298	14.6	55	0	267	0.572453324	0.287	1.407	317.8333333	1.61	0.344	5.26	2.76	5.96	1.53	3.46	1.01	1.14	1293.1	59.2	106.5
7/18/2014 12:00	2.9	280	18.2	36	0	674	0.564740436	0.04	0.689	327.5454545	1.58	0.417	6.2	2.98	6.22	1.14	2.71	0.89	0.93	1186.8	49.1	97.3
7/18/2014 13:00	2.6	308	19.7	33	0	996	0.886332114	0.084	0.837	352.6666667	1.69	0.425	6	2.91	6.66	1.56	4.19	1.01	1.28	1479.5	67.6	130.7
7/18/2014 14:00	2.7	320	20.7	29	0	1025	1.466147367	0.804	2.522	255	-999	-999	-999	-999	-999	-999	-999	-999	-999	-999	-999	-999
7/18/2014 15:00	1.6	294	20.4	25	0	501	1.410308878	0.262	1.259	185.75	1.6	0.434	6.65	2.85	5.89	1.1	3.54	0.82	1.09	1214.7	43.9	82.5
7/18/2014 16:00	1.7	344	19.9	27	0	223	0.980774014	0.41	1.742	176.3636364	1.55	0.369	6.91	2.5	4.38	0.97	2.18	0.47	0.57	1073.6	38.3	84.4
7/18/2014 17:00	2.1	1	18.9	33	0	332	0.762763073	0.392	1.819	52.83333333	1.58	0.332	6.67	2.46	5.23	1.07	2.67	0.55	0.56	1201.2	41.7	97.4
7/18/2014 18:00	1.5	162	18.4	37	0	205	0.712876991	0.06	0.977	31	1.72	0.577	6.48	2.41	5.67	0.72	3.56	0.79	0.95	1313.7	57.3	188.7
7/18/2014 19:00	1.4	197	16.5	47	0	64	0.581339766	0.052	1.339	21.8	2.87	0.372	7.375	3.235	8.365	2.2	6.65	1.61	2.04	1404.75	66.7	151.25
7/18/2014 20:00	1.2	258	14.3	55	0	5	0.492256156	0.023	1.709	33.58333333	2.77	0.495	6.11	3.36	8.7	1.07	6.64	1.63	2.58	-999	-999	-999
7/18/2014 21:00	0.9	317	12.6	58	0	0	0.43278927	0.038	1.611	31.44444444	2.58	0.523	5.94	2.77	8.1	1.48	5.79	1.57	2.1	-999	-999	-999
7/18/2014 22:00	1	306	11.4	56	0	0	0.330311654	0.036	1.328	39.54545455	1.98	-999	5.81	3.26	6.33	1.24	3.92	0.71	1.4	-999	-999	-999
7/18/2014 23:00	1.3	321	13.7	39	0	0	0.233180261	0.015	1.485	43.66666667	-999	-999	-999	-999	-999	-999	-999	-999	-999	-999	-999	-999
7/19/2014 0:00	1.1	312	12.8	40	0	0	-999	0.018	1.749	48.18181818	1.6	-999	6.32	3.75	8.02	1.46	4.24	0.83	1.33	1970.5	85.2	125.8
7/19/2014 1:00	1.3	301	11.8	43	0	0	-999	-0.004	1.888	36.75	-999	-999	-999	-999	-999	-999	-999	-999	-999	-999	-999	-999
7/19/2014 2:00	1.4	316	13.3	37	0	0	0.181350262	-0.001	1.815	43.83333333	-999	-999	-999	-999	-999	-999	-999	-999	-999	-999	-999	-999
7/19/2014 3:00	1.2	326	12.9	38	0	0	0.175909099	0.013	1.586	39.5	-999	-999	-999	-999	-999	-999	-999	-999	-999	-999	-999	-999
7/19/2014 4:00	0.9	284	9.5	51	0	0	0.156248985	0.012	1.137	29.66666667	-999	-999	-999	-999	-999	-999	-999	-999	-999	-999	-999	-999
7/19/2014 5:00	0.7	280	8.7	54	0	2	0.129706448	0.022	1.047	16.54545455	-999	-999	-999	-999	-999	-999	-999	-999	-999	-999	-999	-999
7/19/2014 6:00	1	326	12.3	42	0	43	0.1025846	0.009	1.027	25.22222222	-999	-999	-999	-999	-999	-999	-999	-999	-999	-999	-999	-999
7/19/2014 7:00	1.6	357	16.5	30	0	227	0.078327036	0.131	1.355	33.6	-999	-999	-999	-999	-999	-999	-999	-999	-999	-999	-999	-999
7/19/2014 8:00	1.7	351	19	25	0	442	0.350422591	0.142	1.206	35	-999	-999	-999	-999	-999	-999	-999	-999	-999	-999	-999	-999
7/19/2014 9:00	2.3	323	19.9	22	0	600	1.024391795	0.094	0.999	32	1.48	-999	5.73	1.99	3.13	0.68	2.61	0.3	0.53	996.2	108.1	18.8
7/19/2014 10:00	2.3	279	20.5	22	0	765	1.367510554	0.047	0.809	-999	1.45	0.485	9.07	2.66	4.8	1.01	2.43	0.42	0.73	1276.3	52.5	101.4
7/19/2014 11:00	2	284	21.6	23	0	907	1.518638199	0.057	0.889	-999	1.49	0.425	6.45	2.55	5.4	0.92	2.77	0.61	0.7	1332.9	64.1	95.4
7/19/2014 12:00	2.8	266	22	22	-999	959	1.59850147	0.048	0.917	-999	1.52	0.382	7.93	3.26	5.89	1.07	3.16	0.78	1	1501.6	59.5	110
7/19/2014 13:00	1.4	281	22.8	22	0	1041	1.643870655	0.067	1.083	-999	1.525	0.4365	7.82	2.955	6.315	1.29	3.41	0.81	1.09	1404.05	51.2	102.2
7/19/2014 14:00	3.3	256	23.2	20	0	949	1.495358113	0.07	1.067	-999	1.52	0.449	8.32	2.78	5.92	1.35	3.28	0.86	1.14	1290.4	52.9	118.2
7/19/2014 15:00	2.5	287	23.6	17	0	748	1.209409415	0.06	0.821	-999	1.49	0.568	7.35	2.42	4.36	1.14	2.52	0.51	0.57	1088.8	38.9	72
7/19/2014 16:00	1.9	333	24.1	15	0	683	1.042872093	0.072	0.657	-999	-999	-999	-999	-999	-999	-999	-999	-999	-999	-999	-999	-999
7/19/2014 17:00	2.2	301	23.7	15	0	494	0.902345874	0.074	0.844	-999	1.46	0.55	7.65	2.47	5.25	1.18	2.9	0.84	1.15	997.4	29.5	64
7/19/2014 18:00	1.8	357	22.1	23	0	163	0.838034782	0.032	1.393	-999	1.51	0.582	7.65	3.46	7.16	1.61	4.2	1.27	1.45	-999	-999	-999
7/19/2014 19:00	1.3	344	21.4	24	0	90	0.670058314	0.041	1.221	-999	1.58	0.453	6.86	3.04	6.4	1.5	4.03	1.05	1.41	1335.6	60.8	106.3
7/19/2014 20:00	1.2	300	19.1	27	0	4	0.540828827	0.014	1.25	-999	1.52	0.555	7.64	2.85	6.89	1.48	4.17	1.06	1.42	-999	-999	-999
7/19/2014 21:00	1.5	301	17.7	29	0	0	0.43126583	0.011	1.06	-999	1.68	0.438	7.08	2.19	6.95	1.3	4.96	1.19	1.65	-999	-999	-999
7/19/2014 22:00	1.3	299	16.6	30	0	0	0.362962969	0.029	1.106	-999	1.6	0.407	6.55	2.61	6.77	1.48	4.38	1.09	1.57	-999	-999	-999
7/19/2014 23:00	1.4	305	18.1	27	0	0	0.295176978	0.022	0.91	-999	1.62	0.544	6.58	2.66	6.71	1.62	4.55	1.09	1.41	-999	-999	-999
7/20/2014 0:00	1.2	315	18.2	27	0	0	-999	0.019	0.766	-999	1.55	0.534	6.52	2.67	6.21	1.26	3.53	0.92	1.14	-999	-999	-999
7/20/2014 1:00	1.5	322	17.1	27	0	0	-999	-0.002	0.607	-999	1.44	0.545	5.93	2.44	5.17	0.97	3.07	0.62	0.83	-999	-999	-999
7/20/2014 2:00	1.5	310	17	25	0	0	0.182725767	0.011	0.616	-999	-999	-999	-999	-999	-999	-999	-999	-999	-999	-999	-999	-999
7/20/2014 3:00	1.2	307	16.1	27	0	0	0.172911157	0.013	0.645	-999	1.44	0.531	5.35	2.06	4.34	1.01	2.52	0.61	0.7	-999	-999	-999
7/20/2014 4:00	0.9	283	14.8	30	0	0	0.161078309	-999	-999	-999	1.34	0.535	5.47	2.02	4.53	1.48	2.45	0.89	2.1	-999	-999	-999
7/20/2014 5:00	1	317	14.9	30	0	2	0.145566155	0.026	0.613	-999	1.5	0.652	6.76	2.51	5	1.22	3.23	0.79	1.02	-999	-999	-999
7/20/2014 6:00	1.1	314	15.6	30	0	23	0.137043583	0.028	0.68	-999	1.53	0.609	6.28	2.4	5.31	1	3.32	0.81	1.06	-999	-999	-999
7/20/2014 7:00	1.6	2	17.2	28	0	226	0.149367936	0.448	2.095	-999	1.49	0.549	6.37	2.32	5.11	1.23	2.93	0.62	0.8	-999	-999	-999
7/20/2014 8:00	3.2	24	20.5	21	0	430	0.436413024	0.748	2.929	-999	1.39	0.492	6.72	2.11	4.36	1.02	2.31	0.63	0.67	1072	44.3	85.3
7/20/2014 9:00	3.5	28	21.6	20	0	639	0.916586985	0.418	1.859	-999	1.38	0.518	7.02	2.28	4.74	0.84	2.73	0.57	0.64	1076.3	48.5	89.5
7/20/2014 10:00	1.7	3	22.9	21	0	793	1.138435553	0.163	1.178	-999	1.41	0.53	7.48	2.33	4.86	1.49	2.71	0.61	-999	1106.4	54.5	102.5
7/20/2014 11:00	1.9	293	23.1	21	0	736	1.286094809	0.079	0.871	-999	1.39	0.638	6.92	3.02	5.19	0.98	2.42	0.64	0.71	1143.4	56	113.9
7/20/2014 12:00	1.3	304	23.5	21	0	841	1.082711052	0.061	0.786	-999	-999	-999	-999	-999	-999	-999	-999	-999	-999	-999	-999	-999
7/20/2014 13:00	1.5	280	24.3	20	0	889	1.070274995	0.054	0.754	-999	1.42	0.631	6.9	2.31	5.05	1.36	2.53	0.58	0.63	1023.9	35.5	66.1
7/20/2014 14:00	1.2	272	23.2	22	0	262	1.003848557	0.044	0.692	-999	1.41	0.611	8.04	2.31	5.55	1.52	2.8	0.67	0.63	1030.3	33.6	65.1
7/20/2014 15:00	1.7	355	23.6	22	0	225	0.71063043	0.073	0.794	-999	1.37	0.809	7.38	2.44	5.3	1.27	2.82	0.51	0.52	974.2	102.5	344.2
7/20/2014 16:00	2.2	285	22.3	25	0	36	0.610615516	0.02	0.956	-999	1.43	0.999	7.3	3.04	5.3	1.02	2.64	0.47	0.64	984.3	122.2	195.2
7/20/2014 17:00	2.1	304	16.2	53	1.1	143	0.578840622	0.043	0.889	-999	1.38	0.87	7.38	2.4	5.345	1.095	2.595	0.59	0.68	928.05	34.2	63.95
7/20/2014 18:00	0.8	6	18.4	42	0	237	0.478238915	0.089	0.813	-999	1.4	0.848	7.69	1.69	4.87	1.43	2.37	0.43	0.44	908.8	35	56.7
7/20/2014 19:00	0.9	269	18.1	42	0	19	0.508559098	0.106	1.004	-999	1.38	0.79	7.48	1.67	5.09	1.15	2.93	0.6	0.66	1056.9	54	77.9
7/20/2014 20:00	1.4	292	18.3	36	0	2	0.504239856	0.015	0.495	-999	1.35	0.797	7.29	2.41	5.23	1.13	2.96	0.63	0.67	1196.8	65.8	91.1
7/20/2014 21:00	0.5	281	16.5	42	0	0	0.480156554	0.012	0.642	-999	-999	-999	-999	-999	-999	-999	-999	-999	-999	-999	-999	-999
7/20/2014 22:00	1.3	303	15.1	46	0	0	0.471135917	0.023	0.861	-999	1.49	0.879	6.83	2.54	5.84	1.02	3.37	0.7	0.73	-999	-999	-999
7/20/2014 23:00	1.4	318	14.5	44	0	0	0.415146232	0.014	0.537	-999	1.39	0.783	8.14	2.2	4.96	0.85	2.81	0.56	0.58	-999	-999	-999
7/21/2014 0:00	0.9	302	14.4	39	0	0	-999	0.007	0.394	-999	1.25	0.943	7.9	1.95	4.6	0.65	2.06	0.49	0.38	-999	-999	-999
7/21/2014 1:00	0.9	331	14.5	42	0	0	-999	0.017	0.452	-999	1.27	0.792	7.05	2.27	4.42	0.74	2.21	0.46	0.41	-999	-999	-999
7/21/2014 2:00	1.7	312	16.3	38	0	0	0.243216445	0.015	0.44	-999	1.39	1.025	7.72	2.45	5.43	0.87	2.94	0.48	0.45	-999	-999	-999
7/21/2014 3:00	1.6	340	16	40	0	0	0.25453348	0.019	0.472	-999	1.41	1.037	7.82	2.34	5.09	1.1	2.88	0.52	0.67	-999	-999	-999
7/21/2014 4:00	1.9	355	15.9	41	0	0	0.244485414	0.006	0.469	-999	1.34	0.942	8.07	2.23	5.16	0.97	2.48	0.52	0.64	-999	-999	-999
7/21/2014 5:00	2.1	349	15.4	43	0	1	0.240266949	-0.001	0.506	-999	1.42	0.981	8.34	2.35	4.97	1.22	2.59	0.39	0.42	-999	-999	-999
7/21/2014 6:00	2.4	341	15.5	44	0	16	0.218078684	0.252	1.193	-999	1.43	0.929	7.53	2.53	5.23	1.01	2.86	0.45	0.42	994.8	45.2	67.5
7/21/2014 7:00	2.2	352	16	41	0	45	0.202357801	0.454	1.77	-999	-999	-999	-999	-999	-999	-999	-999	-999	-999	-999	-999	-999
7/21/2014 8:00	1.3	343	17.1	37	0	123	0.184680494	0.537	2.229	-999	1.29	0.996	9.14	2.3	4.78	1.17	2.32	0.44	0.46	816.8	35.8	57.7
7/21/2014 9:00	2.5	295	19.2	31	0	377	0.229810515	0.318	1.088	-999	1.2	1.11	9.32	2.05	4.31	0.83	2.04	0.33	0.29	708.8	34.6	54.8
7/21/2014 10:00	1.5	1	20.7	26	0	509	0.324930495	0.277	1.023	-999	1.18	1.091	7.92	1.74	3.49	0.83	1.41	0.16	0.11	562.9	20.4	29.8
7/21/2014 11:00	2.3	25	22.2	23	0	806	-999	0.189	0.812	-999	0.98	0.955	7.2	1.53	3.3	0.76	1.27	0.2	0.07	537.4	14.3	25.2
7/21/2014 12:00	2.5	278	22.3	22	0	803	-999	0.091	0.596	-999	0.93	0.989	7.595	1.635	3.3	0.605	1.365	0.235	0.175	535.65	19.4	35.15
7/21/2014 13:00	1.4	250	22.5	24	0	842	0.796987306	0.053	0.475	134.3333333	0.93	0.95	7.05	1.46	3.05	0.76	1.24	0.22	0.13	522.5	22.1	24.9
7/21/2014 14:00	2.1	264	23.1	21	0	756	0.73904249	0.082	0.633	366.1666667	0.98	1.062	7.15	1.46	3.49	0.5	1.43	0.15	0.16	556.1	14.9	27.6
7/21/2014 15:00	1.2	243	23.8	21	0	805	0.709537887	0.034	0.571	154.6363636	1	0.87	6.92	1.5	3.29	1.06	1.22	0.26	0.18	545.8	15.7	30.4
7/21/2014 16:00	1.8	275	24.1	18	0	624	0.687752272	0.064	0.562	126.4166667	-999	-999	-999	-999	-999	-999	-999	-999	-999	-999	-999	-999
7/21/2014 17:00	0.9	334	23.9	22	0	510	0.649717254	0.149	0.907	129.3333333	1.23	1.034	7.18	1.47	3.8	0.53	2.32	0.56	0.45	-999	-999	-999
7/21/2014 18:00	0.6	36	22.7	25	0	268	0.597756955	0.065	0.907	105.75	1.54	0.832	7.27	1.73	5.04	1.27	4.59	0.9	1.05	814.6	56.3	147.7
7/21/2014 19:00	1.5	243	20.5	31	0	35	0.492468302	0.034	1.011	140.0833333	1.84	0.778	8.35	1.83	7.05	1.37	7.29	1.84	2.45	1255.5	135.8	364.4
7/21/2014 20:00	0.9	313	18.4	36	0	3	0.349636715	0.029	1.285	137.0909091	2	0.739	8.05	1.93	7.72	1.36	9.59	2.5	3.63	-999	-999	-999
7/21/2014 21:00	1.2	284	16.8	39	0	0	0.234043821	0.032	1.365	169.5833333	1.98	0.778	8.09	1.98	7.84	1.72	9.8	3.02	4.73	-999	-999	-999
7/21/2014 22:00	1.2	305	16.5	36	0	0	0.153762391	0.033	1.076	155.3333333	1.34	0.927	7.41	1.41	5.36	0.75	5.18	1.33	1.74	-999	-999	-999
7/21/2014 23:00	1.4	320	15	40	0	0	0.102392746	0.005	0.745	166.8333333	1.85	0.628	8	2.17	7.1	1.02	8.1	2.19	3.36	-999	-999	-999
7/22/2014 0:00	1.3	335	14.5	42	0	0	-999	0.021	1.062	153.2727273	2.08	1.125	8.9	1.9	8.82	3.25	14.1	4.59	6.22	-999	-999	-999
7/22/2014 1:00	1.2	318	14.7	41	0	0	-999	0.04	1.039	150	2.12	0.954	6.32	3.2	11.34	1.83	15.71	4.97	6.2	-999	-999	-999
7/22/2014 2:00	1.1	313	14.2	43	0	0	0.011251453	0.01	0.97	144.0833333	-999	-999	-999	-999	-999	-999	-999	-999	-999	-999	-999	-999
7/22/2014 3:00	1	328	14.6	38	0	0	0.018617083	0.018	0.546	134.5833333	1.65	0.556	5.12	2.31	6.68	1.59	9.44	2.71	3.61	-999	-999	-999
7/22/2014 4:00	0.8	307	13.5	40	0	0	0.007529837	-999	-999	105.0909091	-999	-999	-999	-999	-999	-999	-999	-999	-999	-999	-999	-999
7/22/2014 5:00	1	290	12.9	40	0	1	-0.004077781	0.016	0.357	49.08333333	1	0.585	5.24	1.28	2.76	0.75	2.08	0.44	0.76	-999	-999	-999
7/22/2014 6:00	0.8	288	11.9	44	0	13	-0.021085284	0.022	0.363	78.75	1.25	0.729	5.24	1.11	2.7	0.85	1.95	0.24	0.39	-999	-999	-999
7/22/2014 7:00	0.9	339	15.4	41	0	228	-0.037220375	-999	-999	111.0833333	1.15	0.753	6.32	1.48	3.27	0.7	1.59	0.38	0.54	-999	-999	-999
7/22/2014 8:00	0.9	91	20.3	29	0	449	0.148634904	0.207	1.209	162.8181818	1.1	1.043	7.03	1.58	3.41	1.14	2.44	0.42	0.57	919.4	73.7	115.8
7/22/2014 9:00	0.7	156	22.2	21	0	635	0.601386662	0.091	0.593	149.9166667	0.96	0.957	6.53	1.68	2.73	0.79	1.42	0.37	0.3	714.9	52.8	93.7
7/22/2014 10:00	1.9	219	23.2	15	0	796	0.788840317	0.059	0.348	116.5	0.98	0.888	7.17	1.38	2.37	0.91	1.16	0.14	0.15	538.5	21	33.6
7/22/2014 11:00	2.4	265	23.4	13	0	905	0.793677707	0.058	0.378	138.3333333	0.99	0.764	7.08	1.06	1.98	0.72	0.82	-999	-999	529.2	14.2	28.2
7/22/2014 12:00	2.2	279	24.1	14	0	954	0.805683841	0.057	0.435	168	1.06	0.61	8.18	1.41	3.06	0.97	1.48	0.34	0.52	609.3	30.4	73.4
7/22/2014 13:00	1.3	211	24	19	0	732	0.852440302	0.129	1.086	233.6666667	3.19	0.294	9.66	4.43	16	3.74	26.57	6.82	9.61	3298	455.5	1237.2
7/22/2014 14:00	4	138	23.2	32	0	817	0.663377032	0.095	2.508	761.25	2.94	0.408	9.37	6.9	26.29	6.24	41.11	10.65	16.41	5362.9	566.5	1568.9
7/22/2014 15:00	4.2	140	23.3	34	0	838	0.613939225	0.081	2.513	858	-999	-999	-999	-999	-999	-999	-999	-999	-999	-999	-999	-999
7/22/2014 16:00	3	132	21.7	37	0	319	0.75429186	0.056	2.686	907.5833333	2.97	0.305	11.72	8.35	30.18	7.47	46.9	12.9	18.37	5095.5	614.2	1614
7/22/2014 17:00	2.3	139	21.2	39	0	199	0.741185197	0.047	2.652	835.9090909	2.58	0.3	9.14	7.53	27.52	6.11	43.45	11.98	17.46	4944.1	606.6	1554.4
7/22/2014 18:00	2.5	141	21.4	38	0	211	0.856289026	-999	-999	935.1666667	3.5	0.308	8.7	10.02	37.05	8.99	59.38	16.27	23.91	6674.3	749	1921.8
7/22/2014 19:00	1.7	176	20.3	37	0	67	1.026891273	0.025	3.207	943.5	3.7	0.425	8.89	8.03	27.72	6.42	39.78	10.27	14.66	3430.5	312.9	841.7
7/22/2014 20:00	1.1	213	18.3	45	0	5	1.136601589	0.017	3.924	856.9166667	5.18	0.42	10.54	9.37	32.31	8.06	43.31	11.95	15.25	3508.9	321.8	887.3
7/22/2014 21:00	0.3	265	16.6	54	0	0	0.998677028	0.005	3.73	681.5454545	4.7	0.371	9.63	11.75	38.99	9.25	59.91	15.39	20.88	6365	648.9	1654.1
7/22/2014 22:00	0.7	310	14.4	64	0	0	0.822638403	0.006	3.051	486.8333333	3.92	0.371	8.78	10.41	39.35	9.68	61.65	16.09	23.5	7377.5	753.5	1947.7
7/22/2014 23:00	1.4	298	15.2	63	0	0	0.716950533	0.013	2.325	361.0833333	-999	-999	-999	-999	-999	-999	-999	-999	-999	-999	-999	-999
7/23/2014 0:00	1.5	283	14.3	64	0	0	-999	0.004	1.968	272.9166667	3.33	0.4395	8.48	7.68	29.325	7.25	38.585	10.045	14.35	-999	-999	-999
7/23/2014 1:00	1.3	307	13.5	58	0	0	-999	0.003	1.366	214.4545455	2.34	0.419	7.93	4.72	15.72	2.86	20.45	5.05	7.01	-999	-999	-999
7/23/2014 2:00	0.9	318	13	54	0	0	-999	-0.013	1.099	227.0909091	2.17	0.568	6.8	4.17	14.2	3.25	19.11	4.56	6.42	-999	-999	-999
7/23/2014 3:00	0.8	308	11.8	56	0	0	-999	0.003	0.913	163.3846154	-999	-999	-999	-999	-999	-999	-999	-999	-999	-999	-999	-999
7/23/2014 4:00	1.5	297	13.5	48	0	0	-999	0.001	0.887	221.9090909	-999	-999	-999	-999	-999	-999	-999	-999	-999	-999	-999	-999
7/23/2014 5:00	1.6	290	14.2	43	0	1	-999	-0.015	0.737	207.8181818	-999	-999	-999	-999	-999	-999	-999	-999	-999	-999	-999	-999
7/23/2014 6:00	1.1	299	12.2	49	0	13	-999	0.005	0.637	152.75	-999	-999	-999	-999	-999	-999	-999	-999	-999	-999	-999	-999
7/23/2014 7:00	0.8	333	14.9	49	0	222	-999	0.731	3.03	175	1.68	-999	6.63	2.44	7.51	2.69	9.96	2.34	3.99	-999	-999	-999
7/23/2014 8:00	0.9	126	20.9	35	0	445	-999	0.896	3.629	219.5833333	-999	-999	-999	-999	-999	-999	-999	-999	-999	-999	-999	-999
7/23/2014 9:00	1.8	134	23.2	26	0	629	-999	0.032	0.846	203.9166667	1.58	0.747	7.69	1.96	4.84	1	5.94	2.17	2.37	1049.4	74.2	187.6
7/23/2014 10:00	2.3	127	24.4	25	0	799	-999	0.052	0.92	297.6363636	1.32	0.513	7.7	2.39	5.09	1.61	4.38	1.08	1.41	786.7	45.8	108.4
7/23/2014 11:00	2.5	138	24	32	0	754	-999	0.084	1.403	439.3846154	2.18	0.694	7.83	3.67	12.6	3.45	14.26	2.96	3.93	1945.1	168.8	431.4
7/23/2014 12:00	3.1	146	24.2	36	0	977	-999	0.069	1.794	574.8	2.06	0.832	10.75	3.75	13.05	3.34	13.81	2.83	4.08	1990.1	146.9	382.1
7/23/2014 13:00	3.4	153	23.1	40	0	559	-999	0.06	1.919	775	-999	-999	-999	-999	-999	-999	-999	-999	-999	-999	-999	-999
7/23/2014 14:00	2.6	149	19.7	63	1.6	225	-999	0.021	3.086	1157.75	-999	-999	-999	-999	-999	-999	-999	-999	-999	-999	-999	-999
7/23/2014 15:00	1.2	284	14.2	85	8.2	33	-999	0.235	2.608	593.5833333	-999	-999	-999	-999	-999	-999	-999	-999	-999	-999	-999	-999
7/23/2014 16:00	0.8	242	13.4	81	0.8	122	-999	0.264	1.846	251.5	-999	-999	-999	-999	-999	-999	-999	-999	-999	-999	-999	-999
7/23/2014 17:00	0.1	174	16.3	73	0	327	-999	0.211	1.273	185.0833333	-999	-999	-999	-999	-999	-999	-999	-999	-999	-999	-999	-999
7/23/2014 18:00	1	277	14.9	80	0	78	-999	0.077	0.58	101.4545455	-999	-999	-999	-999	-999	-999	-999	-999	-999	-999	-999	-999
7/23/2014 19:00	0.6	271	14.3	78	0	75	-999	0.12	0.793	82.16666667	-999	-999	-999	-999	-999	-999	-999	-999	-999	-999	-999	-999
7/23/2014 20:00	1	301	12.3	80	0	9	-999	0.111	0.61	47.5	-999	-999	-999	-999	-999	-999	-999	-999	-999	-999	-999	-999
7/23/2014 21:00	1.2	308	12.9	68	0	0	-999	0.055	0.549	64.25	-999	-999	-999	-999	-999	-999	-999	-999	-999	-999	-999	-999
7/23/2014 22:00	1.2	317	13.9	57	0	0	-999	0.008	0.453	82.2	-999	-999	-999	-999	-999	-999	-999	-999	-999	-999	-999	-999
7/23/2014 23:00	1.2	328	13.6	56	0	0	-999	0.002	0.393	73.33333333	-999	-999	-999	-999	-999	-999	-999	-999	-999	-999	-999	-999
7/24/2014 0:00	1.3	327	13.5	54	0	0	-999	-0.012	0.338	52.58333333	-999	-999	-999	-999	-999	-999	-999	-999	-999	-999	-999	-999
7/24/2014 1:00	1.3	323	15.1	46	0	0	-999	0.011	0.31	103.5833333	-999	-999	-999	-999	-999	-999	-999	-999	-999	-999	-999	-999
7/24/2014 2:00	0.6	307	14.2	50	0	0	-999	0.011	0.323	81.45454545	-999	-999	-999	-999	-999	-999	-999	-999	-999	-999	-999	-999
7/24/2014 3:00	1.9	340	15.7	43	0	0	-999	0.05	0.384	104.4166667	-999	-999	-999	-999	-999	-999	-999	-999	-999	-999	-999	-999
7/24/2014 4:00	2.1	341	17.9	37	0	0	-999	-999	-999	147	-999	-999	-999	-999	-999	-999	-999	-999	-999	-999	-999	-999
7/24/2014 5:00	1.7	307	18.5	35	0	1	-999	0.001	0.44	125.3846154	-999	-999	-999	-999	-999	-999	-999	-999	-999	-999	-999	-999
7/24/2014 6:00	4.8	257	19.9	32	0	29	-999	-0.008	0.495	120.7	-999	-999	-999	-999	-999	-999	-999	-999	-999	-999	-999	-999
7/24/2014 7:00	4.6	263	21.1	30	0	272	-999	0.03	0.639	133.8	-999	-999	-999	-999	-999	-999	-999	-999	-999	-999	-999	-999
7/24/2014 8:00	3.4	270	20.7	33	0	228	-999	0.002	0.664	175.3333333	-999	-999	-999	-999	-999	-999	-999	-999	-999	-999	-999	-999
7/24/2014 9:00	5.2	265	21.4	32	0	530	-999	0.133	0.949	148.5833333	-999	-999	-999	-999	-999	-999	-999	-999	-999	-999	-999	-999
7/24/2014 10:00	6.3	263	22.2	30	0	813	-999	0.248	1.211	154.1666667	-999	-999	-999	-999	-999	-999	-999	-999	-999	-999	-999	-999
7/24/2014 11:00	5	262	23.3	27	0	925	-999	0.132	0.919	158.5714286	-999	-999	-999	-999	-999	-999	-999	-999	-999	-999	-999	-999
7/24/2014 12:00	4.6	266	21.9	32	0	528	-999	0.095	0.856	214.2	-999	-999	-999	-999	-999	-999	-999	-999	-999	-999	-999	-999
7/24/2014 13:00	3	267	21.9	32	0	335	-999	0.092	0.86	221.75	-999	-999	-999	-999	-999	-999	-999	-999	-999	-999	-999	-999
7/24/2014 14:00	3.1	360	20.3	40	0	231	-999	0.314	1.522	256.8333333	-999	-999	-999	-999	-999	-999	-999	-999	-999	-999	-999	-999
7/24/2014 15:00	2.2	336	20.1	43	0	178	-999	0.278	1.449	220.7272727	-999	-999	-999	-999	-999	-999	-999	-999	-999	-999	-999	-999
7/24/2014 16:00	1.9	269	22.2	33	0	725	-999	0.072	0.782	190.75	-999	-999	-999	-999	-999	-999	-999	-999	-999	-999	-999	-999
7/24/2014 17:00	2.7	274	22.4	32	0	582	-999	0.03	0.548	201.7272727	-999	-999	-999	-999	-999	-999	-999	-999	-999	-999	-999	-999
7/24/2014 18:00	1.5	305	22.6	32	0	393	-999	0.034	0.578	171.6666667	-999	-999	-999	-999	-999	-999	-999	-999	-999	-999	-999	-999
7/24/2014 19:00	2.9	273	21.1	36	0	75	-999	0.031	0.646	174.2727273	-999	-999	-999	-999	-999	-999	-999	-999	-999	-999	-999	-999
7/24/2014 20:00	1.7	317	19.7	41	0	5	-999	0.006	0.734	208.1818182	-999	-999	-999	-999	-999	-999	-999	-999	-999	-999	-999	-999
7/24/2014 21:00	1.5	318	19.1	41	0	0	-999	0.006	0.742	224.3333333	-999	-999	-999	-999	-999	-999	-999	-999	-999	-999	-999	-999
7/24/2014 22:00	0.8	287	19.6	35	0	0	-999	-0.007	0.746	264	-999	-999	-999	-999	-999	-999	-999	-999	-999	-999	-999	-999
7/24/2014 23:00	2	259	18.6	41	0	0	-999	0.019	0.692	224.8181818	-999	-999	-999	-999	-999	-999	-999	-999	-999	-999	-999	-999
7/25/2014 0:00	2.3	313	18.7	38	0	0	-999	0.003	0.563	269.9583333	-999	-999	-999	-999	-999	-999	-999	-999	-999	-999	-999	-999
7/25/2014 1:00	1.7	309	18.4	35	0	0	-999	-0.01	0.512	239.4583333	-999	-999	-999	-999	-999	-999	-999	-999	-999	-999	-999	-999
7/25/2014 2:00	2.2	359	17	41	0	0	-999	0.028	0.514	259	-999	-999	-999	-999	-999	-999	-999	-999	-999	-999	-999	-999
7/25/2014 3:00	0.3	308	17.2	40	0	0	-999	0.008	0.526	190.5833333	-999	-999	-999	-999	-999	-999	-999	-999	-999	-999	-999	-999
7/25/2014 4:00	1.7	292	18.4	40	0	0	-999	-0.011	0.547	197.9090909	-999	-999	-999	-999	-999	-999	-999	-999	-999	-999	-999	-999
7/25/2014 5:00	2	298	18.2	40	0	2	-999	0.002	0.553	192.5	-999	-999	-999	-999	-999	-999	-999	-999	-999	-999	-999	-999
7/25/2014 6:00	1	280	18.1	40	0	43	-999	0.01	0.644	183.375	-999	-999	-999	-999	-999	-999	-999	-999	-999	-999	-999	-999
7/25/2014 7:00	2.9	274	19.8	36	0	204	-999	0.042	0.739	178.173913	-999	-999	-999	-999	-999	-999	-999	-999	-999	-999	-999	-999
7/25/2014 8:00	2	305	21.2	34	0	427	-999	0.359	1.778	166.9090909	-999	-999	-999	-999	-999	-999	-999	-999	-999	-999	-999	-999
7/25/2014 9:00	3.5	274	21.7	31	0	568	-999	0.301	1.61	228.7826087	-999	-999	-999	-999	-999	-999	-999	-999	-999	-999	-999	-999
7/25/2014 10:00	4.6	266	22	30	0	710	-999	0.305	1.473	244.5833333	-999	-999	-999	-999	-999	-999	-999	-999	-999	-999	-999	-999
7/25/2014 11:00	3.1	268	23.1	24	0	911	-999	0.139	1.337	352.2083333	-999	-999	-999	-999	-999	-999	-999	-999	-999	-999	-999	-999
7/25/2014 12:00	2.2	264	23.2	28	0	862	-999	0.033	0.802	299	-999	-999	-999	-999	-999	-999	-999	-999	-999	-999	-999	-999
7/25/2014 13:00	0.7	279	22.7	29	0	368	-999	0.187	1.432	-999	-999	-999	-999	-999	-999	-999	-999	-999	-999	-999	-999	-999
7/25/2014 14:00	1.5	95	22	35	0.1	348	-999	0.373	4.248	-999	-999	-999	-999	-999	-999	-999	-999	-999	-999	-999	-999	-999
7/25/2014 15:00	2.9	331	19.2	42	0	297	-999	0.215	2.546	-999	-999	-999	-999	-999	-999	-999	-999	-999	-999	-999	-999	-999
7/25/2014 16:00	1.8	287	21.3	33	0	292	-999	0.11	1.398	285.5555556	-999	-999	-999	-999	-999	-999	-999	-999	-999	-999	-999	-999
7/25/2014 17:00	0.6	240	19.1	42	0	171	-999	0.027	0.84	262.5454545	-999	-999	-999	-999	-999	-999	-999	-999	-999	-999	-999	-999
7/25/2014 18:00	3.7	284	16.8	50	1.7	20	-999	0.011	0.874	252.7083333	-999	-999	-999	-999	-999	-999	-999	-999	-999	-999	-999	-999
7/25/2014 19:00	0.8	314	12.1	80	0.7	96	-999	0.041	0.679	242.2083333	-999	-999	-999	-999	-999	-999	-999	-999	-999	-999	-999	-999
7/25/2014 20:00	1.5	319	13.9	67	0	12	-999	0.056	0.674	170.1666667	-999	-999	-999	-999	-999	-999	-999	-999	-999	-999	-999	-999
7/25/2014 21:00	2.6	322	15.4	55	0	0	-999	0.045	0.73	230.6818182	-999	-999	-999	-999	-999	-999	-999	-999	-999	-999	-999	-999
7/25/2014 22:00	1.5	316	16.5	47	0	0	-999	0.02	0.662	224.7272727	-999	-999	-999	-999	-999	-999	-999	-999	-999	-999	-999	-999
7/25/2014 23:00	1.3	324	17.4	41	0	0	-999	0.018	0.742	236.7083333	-999	-999	-999	-999	-999	-999	-999	-999	-999	-999	-999	-999
7/26/2014 0:00	1.6	325	16.2	48	0	0	-999	0.025	0.631	222.4166667	-999	-999	-999	-999	-999	-999	-999	-999	-999	-999	-999	-999
7/26/2014 1:00	2.1	311	17.3	41	0	0	-999	-0.041	0.527	212.3636364	-999	-999	-999	-999	-999	-999	-999	-999	-999	-999	-999	-999
7/26/2014 2:00	4	283	18.5	36	0.1	0	-999	-0.045	0.47	209	-999	-999	-999	-999	-999	-999	-999	-999	-999	-999	-999	-999
7/26/2014 3:00	2.2	318	17.7	40	0	0	-999	-0.005	0.481	171.5	-999	-999	-999	-999	-999	-999	-999	-999	-999	-999	-999	-999
7/26/2014 4:00	2.8	317	17.8	40	0	0	-999	-999	-999	158.8181818	-999	-999	-999	-999	-999	-999	-999	-999	-999	-999	-999	-999
7/26/2014 5:00	2.7	333	17.9	40	0	1	-999	0.011	0.619	160.1818182	-999	-999	-999	-999	-999	-999	-999	-999	-999	-999	-999	-999
7/26/2014 6:00	2.1	342	17.9	39	0	21	-999	0.007	0.782	193.0833333	-999	-999	-999	-999	-999	-999	-999	-999	-999	-999	-999	-999
7/26/2014 7:00	1.7	13	16.8	45	0	32	-999	-999	-999	202.5833333	-999	-999	-999	-999	-999	-999	-999	-999	-999	-999	-999	-999
7/26/2014 8:00	0.6	297	17.1	45	0	127	-999	0.052	1.244	198.6666667	-999	-999	-999	-999	-999	-999	-999	-999	-999	-999	-999	-999
7/26/2014 9:00	0.8	90	18.7	43	0	259	-999	0.09	1.224	225.25	-999	-999	-999	-999	-999	-999	-999	-999	-999	-999	-999	-999
7/26/2014 10:00	0.6	134	19.3	42	0	440	-999	0.111	1.167	255.6363636	-999	-999	-999	-999	-999	-999	-999	-999	-999	-999	-999	-999
7/26/2014 11:00	1	56	21.2	35	0	624	-999	0.054	1.011	290.1666667	-999	-999	-999	-999	-999	-999	-999	-999	-999	-999	-999	-999
7/26/2014 12:00	2.3	330	22	34	0	581	-999	0.04	1.189	440.25	-999	-999	-999	-999	-999	-999	-999	-999	-999	-999	-999	-999
7/26/2014 13:00	2.9	339	18.4	48	1	370	-999	0.243	1.835	504.5	-999	-999	-999	-999	-999	-999	-999	-999	-999	-999	-999	-999
7/26/2014 14:00	0.8	277	16.3	71	0.1	153	-999	-999	-999	387.4545455	-999	-999	-999	-999	-999	-999	-999	-999	-999	-999	-999	-999
7/26/2014 15:00	1.2	241	19	46	0	504	-999	-999	-999	377.0833333	-999	-999	-999	-999	-999	-999	-999	-999	-999	-999	-999	-999
7/26/2014 16:00	0.9	204	20.7	39	0	169	-999	-999	-999	413.8333333	-999	-999	-999	-999	-999	-999	-999	-999	-999	-999	-999	-999
7/26/2014 17:00	0.9	344	18.7	54	0	109	-999	-999	-999	839.1666667	-999	-999	-999	-999	-999	-999	-999	-999	-999	-999	-999	-999
7/26/2014 18:00	0.7	289	14.8	70	7.1	15	-999	-999	-999	1006	-999	-999	-999	-999	-999	-999	-999	-999	-999	-999	-999	-999
7/26/2014 19:00	0.7	203	11.6	89	0.1	31	-999	-999	-999	680.3333333	-999	-999	-999	-999	-999	-999	-999	-999	-999	-999	-999	-999
7/26/2014 20:00	1.4	270	12.4	71	0	2	-999	-999	-999	409.5	-999	-999	-999	-999	-999	-999	-999	-999	-999	-999	-999	-999
7/26/2014 21:00	1.1	273	11.4	75	0	0	-999	-999	-999	159.5	-999	-999	-999	-999	-999	-999	-999	-999	-999	-999	-999	-999
7/26/2014 22:00	1.2	284	11	70	0	0	-999	-999	-999	151.8181818	-999	-999	-999	-999	-999	-999	-999	-999	-999	-999	-999	-999
7/26/2014 23:00	1.5	286	11.4	63	0	0	-999	-999	-999	114.4166667	-999	-999	-999	-999	-999	-999	-999	-999	-999	-999	-999	-999
7/27/2014 0:00	2	270	11.4	58	0	0	-999	-999	-999	150.5	-999	-999	-999	-999	-999	-999	-999	-999	-999	-999	-999	-999
7/27/2014 1:00	2.1	271	11.6	55	0	0	-999	-0.01	0.419	122.3333333	-999	-999	-999	-999	-999	-999	-999	-999	-999	-999	-999	-999
7/27/2014 2:00	1.5	291	11.6	52	0	0	-999	-0.008	0.439	118.9166667	-999	-999	-999	-999	-999	-999	-999	-999	-999	-999	-999	-999
7/27/2014 3:00	1.6	296	10	61	0	0	-999	0.008	0.313	103.3636364	-999	-999	-999	-999	-999	-999	-999	-999	-999	-999	-999	-999
7/27/2014 4:00	1.4	285	10.2	57	0	0	-999	0.04	0.386	119.3333333	-999	-999	-999	-999	-999	-999	-999	-999	-999	-999	-999	-999
7/27/2014 5:00	1.2	298	9	64	0	1	-999	0.017	0.47	109.5833333	-999	-999	-999	-999	-999	-999	-999	-999	-999	-999	-999	-999
7/27/2014 6:00	1	300	8.8	67	0	21	-999	0.443	1.459	114.6666667	-999	-999	-999	-999	-999	-999	-999	-999	-999	-999	-999	-999
7/27/2014 7:00	0.6	346	10.4	71	0	187	-999	0.575	2.312	118.6363636	-999	-999	-999	-999	-999	-999	-999	-999	-999	-999	-999	-999
7/27/2014 8:00	0.4	88	14.7	55	0	409	-999	0.061	1.06	307.5	-999	-999	-999	-999	-999	-999	-999	-999	-999	-999	-999	-999
7/27/2014 9:00	0.9	87	16.4	49	0	581	-999	0.055	1.14	390.6666667	-999	-999	-999	-999	-999	-999	-999	-999	-999	-999	-999	-999
7/27/2014 10:00	1.2	112	17	59	0	634	-999	0.107	1.53	500.0833333	-999	-999	-999	-999	-999	-999	-999	-999	-999	-999	-999	-999
7/27/2014 11:00	2.6	142	16.6	71	0	710	-999	0.106	1.876	615.4545455	-999	-999	-999	-999	-999	-999	-999	-999	-999	-999	-999	-999
7/27/2014 12:00	2.8	153	16.5	75	0	440	-999	0.08	1.776	639.1666667	-999	-999	-999	-999	-999	-999	-999	-999	-999	-999	-999	-999
7/27/2014 13:00	1.8	169	14.6	85	0	183	-999	0.058	1.809	591.75	-999	-999	-999	-999	-999	-999	-999	-999	-999	-999	-999	-999
7/27/2014 14:00	1.7	147	15.2	82	0	511	-999	0.1	1.819	604.6666667	-999	-999	-999	-999	-999	-999	-999	-999	-999	-999	-999	-999
7/27/2014 15:00	2.6	145	16.7	75	0	508	-999	0.054	1.56	660.3636364	-999	-999	-999	-999	-999	-999	-999	-999	-999	-999	-999	-999
7/27/2014 16:00	1.8	167	16.1	77	0	357	-999	0.075	1.769	641.5	-999	-999	-999	-999	-999	-999	-999	-999	-999	-999	-999	-999
7/27/2014 17:00	1.5	173	15.5	82	0	197	-999	0.053	2.135	754.1666667	-999	-999	-999	-999	-999	-999	-999	-999	-999	-999	-999	-999
7/27/2014 18:00	1.5	185	15.2	82	0	106	-999	0.021	2.145	690.7272727	-999	-999	-999	-999	-999	-999	-999	-999	-999	-999	-999	-999
7/27/2014 19:00	0.8	338	12.6	82	8.6	23	-999	0.006	1.785	635.1666667	-999	-999	-999	-999	-999	-999	-999	-999	-999	-999	-999	-999
7/27/2014 20:00	1.4	279	11	90	0	6	-999	0.036	0.976	388.75	-999	-999	-999	-999	-999	-999	-999	-999	-999	-999	-999	-999
7/27/2014 21:00	1.3	289	10.9	90	0	0	-999	-0.005	1.153	352	-999	-999	-999	-999	-999	-999	-999	-999	-999	-999	-999	-999
7/27/2014 22:00	1	287	9.8	90	0	0	-999	0.009	0.812	264.4166667	-999	-999	-999	-999	-999	-999	-999	-999	-999	-999	-999	-999
7/27/2014 23:00	0.7	272	9.3	93	0	0	-999	0.105	1.526	173.0909091	-999	-999	-999	-999	-999	-999	-999	-999	-999	-999	-999	-999
7/28/2014 0:00	0.6	287	9.6	93	0	0	-999	0.009	1.512	161.8181818	-999	-999	-999	-999	-999	-999	-999	-999	-999	-999	-999	-999
7/28/2014 1:00	0.9	314	10.3	93	0	0	-999	0.007	1.712	165.8333333	-999	-999	-999	-999	-999	-999	-999	-999	-999	-999	-999	-999
7/28/2014 2:00	1.2	303	10.1	92	0	0	-999	0.016	1.228	233.9166667	-999	-999	-999	-999	-999	-999	-999	-999	-999	-999	-999	-999
7/28/2014 3:00	1.3	310	9.9	91	0	0	-999	0.007	0.945	201.3636364	-999	-999	-999	-999	-999	-999	-999	-999	-999	-999	-999	-999
7/28/2014 4:00	1.5	296	9.5	88	0	0	-999	-999	-999	198.8333333	-999	-999	-999	-999	-999	-999	-999	-999	-999	-999	-999	-999
7/28/2014 5:00	1.9	291	9.2	85	0	1	-999	0.003	0.576	170.3333333	-999	-999	-999	-999	-999	-999	-999	-999	-999	-999	-999	-999
7/28/2014 6:00	1.7	304	9.4	84	0	33	-999	0.12	1.075	171.25	-999	-999	-999	-999	-999	-999	-999	-999	-999	-999	-999	-999
7/28/2014 7:00	0.9	331	11.4	88	0	195	-999	0.441	2.096	182.0909091	-999	-999	-999	-999	-999	-999	-999	-999	-999	-999	-999	-999
7/28/2014 8:00	0.6	7	14.6	75	0	414	-999	0.781	2.736	229.25	-999	-999	-999	-999	-999	-999	-999	-999	-999	-999	-999	-999
7/28/2014 9:00	1.4	142	17.2	59	0	603	-999	0.08	0.999	363.8333333	-999	-999	-999	-999	-999	-999	-999	-999	-999	-999	-999	-999
7/28/2014 10:00	1.7	158	18.1	58	0	782	-999	0.078	1.093	428.6	-999	-999	-999	-999	-999	-999	-999	-999	-999	-999	-999	-999
7/28/2014 11:00	2.2	157	19.1	58	0	911	-999	0.104	1.465	-999	-999	-999	-999	-999	-999	-999	-999	-999	-999	-999	-999	-999
7/28/2014 12:00	1	186	16.8	67	4.7	254	-999	0.017	1.376	478	-999	-999	-999	-999	-999	-999	-999	-999	-999	-999	-999	-999
7/28/2014 13:00	1.1	249	15.2	83	0.3	307	-999	0.179	1.926	591.1666667	-999	-999	-999	-999	-999	-999	-999	-999	-999	-999	-999	-999
7/28/2014 14:00	0.6	359	13.8	87	0.4	292	-999	0.269	2.337	427.5833333	-999	-999	-999	-999	-999	-999	-999	-999	-999	-999	-999	-999
7/28/2014 15:00	0.9	149	16.4	72	0	589	-999	0.053	1.668	621.6666667	-999	-999	-999	-999	-999	-999	-999	-999	-999	-999	-999	-999
7/28/2014 16:00	0.4	177	17.2	64	0	283	-999	0.043	1.708	575.7272727	-999	-999	-999	-999	-999	-999	-999	-999	-999	-999	-999	-999
7/28/2014 17:00	0.8	178	16.7	66	0	166	-999	0.05	1.717	512.9166667	-999	-999	-999	-999	-999	-999	-999	-999	-999	-999	-999	-999
7/28/2014 18:00	1.3	176	16.5	61	0	190	-999	0.033	1.405	496.0833333	-999	-999	-999	-999	-999	-999	-999	-999	-999	-999	-999	-999
7/28/2014 19:00	0.8	268	14.7	74	0	61	-999	0.207	2.415	321.0833333	-999	-999	-999	-999	-999	-999	-999	-999	-999	-999	-999	-999
7/28/2014 20:00	1.2	293	12.8	79	0	2	-999	0.019	0.753	228.4545455	-999	-999	-999	-999	-999	-999	-999	-999	-999	-999	-999	-999
7/28/2014 21:00	0.9	318	11.7	78	0	0	-999	0.16	1.385	187.5	-999	-999	-999	-999	-999	-999	-999	-999	-999	-999	-999	-999
7/28/2014 22:00	0.8	304	10.6	86	0	0	-999	0.058	1.186	170.6666667	-999	-999	-999	-999	-999	-999	-999	-999	-999	-999	-999	-999
7/28/2014 23:00	1.2	320	11.9	88	0	0	-999	0.028	3.244	386.3333333	-999	-999	-999	-999	-999	-999	-999	-999	-999	-999	-999	-999
7/29/2014 0:00	1.4	297	11.1	87	0	0	-999	0.005	1.904	230.4545455	-999	-999	-999	-999	-999	-999	-999	-999	-999	-999	-999	-999
7/29/2014 1:00	1.6	282	10.9	86	0	0	-999	0.009	2.026	273.3333333	-999	-999	-999	-999	-999	-999	-999	-999	-999	-999	-999	-999
7/29/2014 2:00	1.3	298	10.3	84	0	0	-999	0.046	1.346	257.0833333	-999	-999	-999	-999	-999	-999	-999	-999	-999	-999	-999	-999
7/29/2014 3:00	1	331	10.2	82	0	0	-999	0.025	1.239	194.9166667	-999	-999	-999	-999	-999	-999	-999	-999	-999	-999	-999	-999
7/29/2014 4:00	1	324	10.5	79	0	0	-999	0.02	1.048	227.2727273	-999	-999	-999	-999	-999	-999	-999	-999	-999	-999	-999	-999
7/29/2014 5:00	1.4	305	10.7	75	0	1	-999	0.002	0.909	216.8333333	-999	-999	-999	-999	-999	-999	-999	-999	-999	-999	-999	-999
7/29/2014 6:00	1	311	10.8	78	0	26	-999	0.047	1.205	209.25	-999	-999	-999	-999	-999	-999	-999	-999	-999	-999	-999	-999
7/29/2014 7:00	0.5	338	12.4	79	0	154	-999	0.2	1.934	288.0833333	-999	-999	-999	-999	-999	-999	-999	-999	-999	-999	-999	-999
7/29/2014 8:00	0.5	14	14.8	69	0	246	-999	0.216	3.14	610.75	-999	-999	-999	-999	-999	-999	-999	-999	-999	-999	-999	-999
7/29/2014 9:00	0.9	20	15.1	69	0.2	183	-999	0.43	4.192	635.1818182	-999	-999	-999	-999	-999	-999	-999	-999	-999	-999	-999	-999
7/29/2014 10:00	1	338	13.8	84	1	143	-999	0.238	3.235	575.5833333	-999	-999	-999	-999	-999	-999	-999	-999	-999	-999	-999	-999
7/29/2014 11:00	1.2	345	12.4	77	0.2	122	-999	0.147	2.015	424.1666667	-999	-999	-999	-999	-999	-999	-999	-999	-999	-999	-999	-999
7/29/2014 12:00	0.6	303	11.4	81	9.5	77	-999	0.134	1.804	406	-999	-999	-999	-999	-999	-999	-999	-999	-999	-999	-999	-999
7/29/2014 13:00	0.1	314	11.3	87	0.8	222	-999	0.211	2.139	409.5454545	-999	-999	-999	-999	-999	-999	-999	-999	-999	-999	-999	-999
7/29/2014 14:00	0.6	319	12.7	82	0	215	-999	0.626	3.947	368.0833333	-999	-999	-999	-999	-999	-999	-999	-999	-999	-999	-999	-999
7/29/2014 15:00	0.2	328	12.7	83	0.3	107	-999	0.58	4.276	354	-999	-999	-999	-999	-999	-999	-999	-999	-999	-999	-999	-999
7/29/2014 16:00	1.1	341	11.8	91	1.2	63	-999	0.663	4.057	299.5	-999	-999	-999	-999	-999	-999	-999	-999	-999	-999	-999	-999
7/29/2014 17:00	1	339	11	92	0.5	62	-999	0.407	3.684	357.0909091	-999	-999	-999	-999	-999	-999	-999	-999	-999	-999	-999	-999
7/29/2014 18:00	0.5	179	10.2	93	1.7	26	-999	0.044	0.987	328.9166667	-999	-999	-999	-999	-999	-999	-999	-999	-999	-999	-999	-999
7/29/2014 19:00	0.3	348	10.1	93	1	11	-999	0.006	1.172	304.1666667	-999	-999	-999	-999	-999	-999	-999	-999	-999	-999	-999	-999
7/29/2014 20:00	0.5	339	10	93	0.9	0	-999	-0.023	1.444	324.5	-999	-999	-999	-999	-999	-999	-999	-999	-999	-999	-999	-999
7/29/2014 21:00	0.9	348	9.8	93	0.6	0	-999	0.012	0.796	335.7272727	-999	-999	-999	-999	-999	-999	-999	-999	-999	-999	-999	-999
7/29/2014 22:00	0.1	179	9.7	93	0.1	0	-999	0.032	1.3	298.5833333	-999	-999	-999	-999	-999	-999	-999	-999	-999	-999	-999	-999
7/29/2014 23:00	0.8	351	9.5	93	2.6	0	-999	0.024	0.601	259.75	-999	-999	-999	-999	-999	-999	-999	-999	-999	-999	-999	-999
7/30/2014 0:00	1.7	331	9	93	3.5	0	-999	-0.011	0.598	305.5833333	-999	-999	-999	-999	-999	-999	-999	-999	-999	-999	-999	-999
7/30/2014 1:00	1.3	310	9.1	93	0.4	0	-999	0.013	0.76	267.3333333	-999	-999	-999	-999	-999	-999	-999	-999	-999	-999	-999	-999
7/30/2014 2:00	0.6	360	9.1	93	2.6	0	-999	-0.013	0.563	248.1818182	-999	-999	-999	-999	-999	-999	-999	-999	-999	-999	-999	-999
7/30/2014 3:00	1.5	198	8.5	93	3.1	0	-999	0.014	0.427	295.75	-999	-999	-999	-999	-999	-999	-999	-999	-999	-999	-999	-999
7/30/2014 4:00	0.5	162	8.1	93	1	0	-999	-999	-999	301.75	-999	-999	-999	-999	-999	-999	-999	-999	-999	-999	-999	-999
7/30/2014 5:00	0.3	27	8	93	0.3	0	-999	0.022	0.487	261.3333333	-999	-999	-999	-999	-999	-999	-999	-999	-999	-999	-999	-999
7/30/2014 6:00	0.4	217	8	93	0.6	12	-999	-0.012	0.45	274.7272727	-999	-999	-999	-999	-999	-999	-999	-999	-999	-999	-999	-999
7/30/2014 7:00	0.9	148	8.1	93	2.8	32	-999	-999	-999	286.6666667	-999	-999	-999	-999	-999	-999	-999	-999	-999	-999	-999	-999
7/30/2014 8:00	1	155	8.3	93	3.1	53	-999	0.059	0.946	322.9166667	-999	-999	-999	-999	-999	-999	-999	-999	-999	-999	-999	-999
7/30/2014 9:00	1.7	188	8.3	93	3.6	89	-999	0.046	0.467	303.7142857	-999	-999	-999	-999	-999	-999	-999	-999	-999	-999	-999	-999
7/30/2014 10:00	1.7	212	8.2	93	2.7	139	-999	0.044	0.339	-999	1.51	-999	4.72	5.2	12.19	-999	16.68	5.17	5.04	-999	-999	-999
7/30/2014 11:00	1.1	200	8.5	93	0.7	157	-999	0.019	0.264	-999	1.25	-999	5.9	3.34	11.7	3.08	13.48	2.06	4.18	1579.5	109.4	256.9
7/30/2014 12:00	1.5	190	8.5	93	2.1	178	-999	0.07	0.489	-999	1.48	0.437	10.77	3.9	13.1	2.83	14.39	2.94	4.2	2217.5	125.6	321.3
7/30/2014 13:00	1.6	178	8.7	93	0.6	231	-999	0.064	0.527	-999	1.605	0.3585	6.7	4.065	13.925	4.11	16.935	3.16	4.1	2470.05	157.05	412.75
7/30/2014 14:00	1.5	183	9	93	1.5	280	-999	0.022	0.382	-999	1.64	-999	6.44	4.49	15.72	4.47	19.43	4.53	6.39	2787.8	195.5	512.8
7/30/2014 15:00	1.6	179	9.1	93	0.1	177	-999	0.041	0.38	-999	1.52	0.643	6.48	4.07	14.04	3.01	15.39	3.55	4.9	2271	138.6	338.8
7/30/2014 16:00	1.4	186	8.7	93	2.5	144	-999	0.053	0.397	355	1.68	0.403	6.43	4.25	15.5	3.4	17.43	4.08	5.64	2478.3	167	412.8
7/30/2014 17:00	1.4	190	8.8	93	0.3	100	-999	0.03	0.408	375.8333333	2.14	0.722	6.88	4.76	17.55	3.96	22.21	5.28	7.17	-999	-999	-999
7/30/2014 18:00	1.3	191	8.5	93	0.3	47	-999	0.02	0.527	399.8333333	-999	-999	-999	-999	-999	-999	-999	-999	-999	-999	-999	-999
7/30/2014 19:00	1	208	8	93	0.4	14	-999	0.025	0.477	340.0833333	-999	-999	-999	-999	-999	-999	-999	-999	-999	-999	-999	-999
7/30/2014 20:00	0.3	289	7.7	93	1	1	-999	0.018	0.759	364.2727273	-999	-999	-999	-999	-999	-999	-999	-999	-999	-999	-999	-999
7/30/2014 21:00	0.2	37	7.5	93	0.2	0	-999	0.01	0.683	364	-999	-999	-999	-999	-999	-999	-999	-999	-999	-999	-999	-999
7/30/2014 22:00	0.4	203	7.6	93	0	0	-999	0.007	0.462	347.9166667	-999	-999	-999	-999	-999	-999	-999	-999	-999	-999	-999	-999
7/30/2014 23:00	0.7	156	7.5	93	0	0	-999	0.017	0.524	280.25	-999	-999	-999	-999	-999	-999	-999	-999	-999	-999	-999	-999
7/31/2014 0:00	0.1	212	7.4	93	0	0	-999	0.015	0.402	275.9166667	-999	-999	-999	-999	-999	-999	-999	-999	-999	-999	-999	-999
7/31/2014 1:00	0.6	323	7.2	93	0	0	-999	0.032	0.462	228.2727273	-999	-999	-999	-999	-999	-999	-999	-999	-999	-999	-999	-999
7/31/2014 2:00	1	327	6.9	93	0	0	-999	0.023	0.333	161.75	-999	-999	-999	-999	-999	-999	-999	-999	-999	-999	-999	-999
7/31/2014 3:00	1.3	288	6.9	92	0	0	-999	0.014	0.326	169.25	-999	-999	-999	-999	-999	-999	-999	-999	-999	-999	-999	-999
7/31/2014 4:00	0.7	317	7	93	0	0	-999	0.006	0.437	141.8333333	-999	-999	-999	-999	-999	-999	-999	-999	-999	-999	-999	-999
7/31/2014 5:00	0.6	309	7.6	93	0.2	0	-999	0.001	0.586	123.4545455	-999	-999	-999	-999	-999	-999	-999	-999	-999	-999	-999	-999
7/31/2014 6:00	0.3	328	7.7	93	1.6	13	-999	-0.005	1.174	172.9166667	-999	-999	-999	-999	-999	-999	-999	-999	-999	-999	-999	-999
7/31/2014 7:00	0.1	65	7.9	93	0.8	51	-999	0.101	1.499	241.25	-999	-999	-999	-999	-999	-999	-999	-999	-999	-999	-999	-999
7/31/2014 8:00	0.3	113	8.5	93	0	115	-999	0.245	2.072	284.75	-999	-999	-999	-999	-999	-999	-999	-999	-999	-999	-999	-999
7/31/2014 9:00	0.8	152	9.8	88	0	237	-999	0.16	1.115	314.1818182	-999	-999	-999	-999	-999	-999	-999	-999	-999	-999	-999	-999
7/31/2014 10:00	1.5	146	11.1	76	0	549	-999	0.11	0.84	353.8333333	-999	-999	-999	-999	-999	-999	-999	-999	-999	-999	-999	-999
7/31/2014 11:00	1.2	165	12.3	61	0	576	-999	0.053	0.546	323	1.64	0.643	5.74	3.81	11.58	2.06	12.81	3.16	3.87	1911.6	118.6	278.9
7/31/2014 12:00	1.4	169	12.4	61	0	378	-999	0.047	0.51	298.0833333	-999	-999	-999	-999	-999	-999	-999	-999	-999	-999	-999	-999
7/31/2014 13:00	1.2	145	12.4	61	0	339	-999	0.027	0.591	278.8181818	-999	-999	-999	-999	-999	-999	-999	-999	-999	-999	-999	-999
7/31/2014 14:00	1.9	129	13.6	59	0	821	-999	0.036	0.628	277.4166667	2.02	0.571	6.32	3.58	12.01	2.86	12.27	2.49	2.93	1483.5	84.3	191.3
7/31/2014 15:00	1.7	205	13.8	62	0	589	-999	0.036	0.653	356.6666667	-999	-999	-999	-999	-999	-999	-999	-999	-999	-999	-999	-999
7/31/2014 16:00	1.9	143	14.1	60	0	546	-999	0.059	1.153	505.4166667	2.2	0.679	6.72	3.6	12.15	2.67	12.48	2.45	3.34	1417.1	83.2	201.1
7/31/2014 17:00	2.2	141	13.8	61	0	364	-999	0.081	1.535	589	-999	-999	-999	-999	-999	-999	-999	-999	-999	-999	-999	-999
7/31/2014 18:00	1.6	167	12.6	63	0	166	-999	0.085	1.126	460	-999	-999	-999	-999	-999	-999	-999	-999	-999	-999	-999	-999
7/31/2014 19:00	1.5	221	10.8	70	0	42	-999	0.063	0.946	324	2.43	0.388	6.02	3.83	13.63	4.38	14.55	3.74	4.11	1513.9	150.2	364.5
7/31/2014 20:00	0.5	271	8.9	79	0	3	-999	0.099	1.746	213.3333333	-999	-999	-999	-999	-999	-999	-999	-999	-999	-999	-999	-999
7/31/2014 21:00	1.1	313	7.8	78	0	0	-999	0.179	1.446	198.8181818	2.42	0.545	4.9	4.09	12.49	4	14.58	3.21	4.47	-999	-999	-999
7/31/2014 22:00	1.5	325	6.7	76	0	0	-999	0.007	0.726	158.5833333	1.94	0.459	4.7	3.11	11.18	2.22	12.58	2.85	3.5	-999	-999	-999
7/31/2014 23:00	1.4	312	6	76	0	0	-999	-0.007	0.486	190.3333333	1.89	0.568	4.7	3.13	11.48	2.43	15.55	3.37	5.09	-999	-999	-999
8/1/2014 0:00	1.2	330	5.6	79	0	0	-999	-0.004	0.581	-999	1.95	0.396	4.7	2.93	10.62	1.97	13.89	2.9	4.05	-999	-999	-999
8/1/2014 1:00	1.1	326	5.7	81	0	0	-999	0.007	0.816	165.8	2.09	0.369	4.53	2.81	10.38	1.79	11.62	2.42	3	-999	-999	-999
8/1/2014 2:00	1.2	326	6.1	77	0	0	-999	0.016	0.736	147.9090909	-999	-999	-999	-999	-999	-999	-999	-999	-999	-999	-999	-999
8/1/2014 3:00	1	328	5.7	78	0	0	-999	0.032	0.646	148.5833333	-999	-999	-999	-999	-999	-999	-999	-999	-999	-999	-999	-999
8/1/2014 4:00	0.9	324	5.5	79	0	0	-999	-999	-999	129.0833333	-999	-999	-999	-999	-999	-999	-999	-999	-999	-999	-999	-999
8/1/2014 5:00	0.6	296	3.9	89	0	1	-999	0.071	0.97	90.91666667	-999	-999	-999	-999	-999	-999	-999	-999	-999	-999	-999	-999
8/1/2014 6:00	0.8	305	5.6	82	0	34	-999	0.165	1.057	114.0909091	-999	-999	-999	-999	-999	-999	-999	-999	-999	-999	-999	-999
8/1/2014 7:00	0.2	314	7	84	0	84	-999	0.669	2.561	96.83333333	-999	-999	-999	-999	-999	-999	-999	-999	-999	-999	-999	-999
8/1/2014 8:00	1.1	146	10.2	76	0	270	-999	1.228	3.407	238.1666667	2.05	0.464	5.14	3.68	10.65	2.13	9.41	2.04	2.89	-999	-999	-999
8/1/2014 9:00	3	123	12.7	63	0	620	-999	0.092	1.006	348.3333333	1.79	0.463	4.72	4.08	12.04	2.69	11.22	2.57	2.99	1527.7	59.8	130.2
8/1/2014 10:00	2.6	117	14.2	56	0	856	-999	0.078	0.951	379	1.89	0.659	5.65	4.26	11.51	2.96	10.89	2.23	2.55	1567.7	64.9	139.8
8/1/2014 11:00	2.5	130	14.8	54	0	715	-999	0.075	0.992	388.8333333	1.82	0.631	5.88	3.14	11.94	2.21	12.07	2.03	2.35	1347.1	59.5	122.8
8/1/2014 12:00	2.7	139	14.2	60	0	461	-999	0.045	1.214	479.8333333	2.11	0.552	5.45	4.23	12.33	3.01	12.04	2.4	3	1584.8	54.6	149.6
8/1/2014 13:00	2.6	143	14.9	54	0	638	-999	0.076	1.647	586.75	2.48	0.397	6.41	3.72	11.77	3.27	13.05	2.59	3.27	1593.6	75.4	162.4
8/1/2014 14:00	3	142	14.5	53	0	383	-999	0.109	2.188	677.3636364	3.27	0.499	6.09	4.64	13.43	2.7	15.27	3.19	4.17	1695.7	85.8	201.7
8/1/2014 15:00	2.5	157	14.8	52	0	621	-999	0.184	3.297	845.0833333	6.81	0.353	6.29	4.04	14.43	4.16	15.38	3.42	4.22	1630.5	79.1	174.7
8/1/2014 16:00	1.8	158	13.9	54	0	132	-999	0.127	3.616	860.0833333	5.64	0.361	8.48	4.51	15.23	3.12	14.63	3.62	4.7	1428.7	79.9	184.2
8/1/2014 17:00	1.4	160	13.6	61	0	229	-999	0.251	5.024	938.4545455	10.17	0.312	7.63	5.12	18.87	3.96	19.39	5.54	8.06	2271.2	131.9	282
8/1/2014 18:00	1.9	157	14.1	55	0	229	-999	0.13	4.287	917.0909091	7.16	0.379	8.38	5.2	18.21	4.18	17.58	5.56	7.06	1742.2	106.1	226.7
8/1/2014 19:00	1.1	224	11.9	67	0	41	-999	0.06	3.085	624.4166667	7.06	0.196	-999	5.22	18.34	3.73	18.31	4.98	7.17	1833.3	117.2	266.5
8/1/2014 20:00	0.5	250	10	72	0	4	-999	0.009	3.182	342.5833333	-999	-999	-999	-999	-999	-999	-999	-999	-999	-999	-999	-999
8/1/2014 21:00	0.5	270	7.7	79	0	0	-999	0.055	2.878	273.4166667	5.02	0.311	4.27	3.31	13.24	2.62	13.93	3.39	4.48	-999	-999	-999
8/1/2014 22:00	0.7	291	6.9	80	0	0	-999	0.041	2.436	186.3636364	4.27	0.388	4.35	3.35	11.79	2.23	11.16	2.51	3.76	-999	-999	-999
8/1/2014 23:00	0.8	298	6	79	0	0	-999	0.038	1.701	129.1666667	3.32	0.484	4.21	2.71	10.07	1.87	9.44	1.97	2.72	-999	-999	-999
8/2/2014 0:00	0.8	282	4.8	79	0	0	-999	0.021	0.792	101.25	1.99	0.422	3.38	1.96	6.97	1.19	7.14	1.32	1.81	-999	-999	-999
8/2/2014 1:00	1	300	4.8	76	0	0	-999	-0.002	0.636	102.75	1.54	0.452	3.22	1.83	6.65	1.26	6.25	1.08	1.63	-999	-999	-999
8/2/2014 2:00	0.9	299	4.8	74	0	0	-999	0.015	0.463	95.83333333	1.42	0.571	3.75	1.83	6.34	1.85	6.27	0.88	1.28	-999	-999	-999
8/2/2014 3:00	1	316	4.9	69	0	0	-999	0.031	0.437	83	-999	-999	-999	-999	-999	-999	-999	-999	-999	-999	-999	-999
8/2/2014 4:00	1.4	321	5.8	65	0	0	-999	0.028	0.346	91	1.48	0.369	3.28	1.83	6.59	1.15	6.78	0.91	1.4	-999	-999	-999
8/2/2014 5:00	1.6	304	6.4	60	0	1	-999	-0.003	0.25	102	1.35	0.382	4.52	1.87	6.34	1.24	7.16	1.03	1.3	1152.2	44.5	84.7
8/2/2014 6:00	1.6	300	6.1	59	0	12	-999	0.007	0.267	103	1.41	0.573	3.9	1.86	5.55	1.53	6.11	1.01	1.08	-999	-999	-999
8/2/2014 7:00	0.7	319	7.4	66	0	163	-999	0.272	1.26	81.54545455	-999	-999	-999	-999	-999	-999	-999	-999	-999	-999	-999	-999
8/2/2014 8:00	0.6	68	12.5	47	0	430	-999	0.307	1.371	154.6666667	1.32	0.703	4.66	1.89	4.87	1.07	4.43	1.16	1.14	-999	-999	-999
8/2/2014 9:00	1.4	166	15.4	26	0	617	-999	0.019	0.465	189.4166667	1.24	0.267	4.58	-999	5.56	-999	3.53	-999	-999	972.8	24.9	51.5
8/2/2014 10:00	1.9	136	16.3	27	0	769	-999	0.072	0.542	197.4166667	1.39	0.167	4.83	2.06	6.29	1.65	5.53	0.95	0.82	960.4	68	153.5
8/2/2014 11:00	2.2	138	16.8	29	0	879	-999	-999	-999	220.1818182	-999	-999	-999	-999	-999	-999	-999	-999	-999	-999	-999	-999
8/2/2014 12:00	2.2	147	17.6	27	0	940	-999	0.068	0.668	271.5	-999	-999	-999	-999	-999	-999	-999	-999	-999	-999	-999	-999
8/2/2014 13:00	2.6	136	17.9	29	0	942	-999	0.069	0.816	-999	1.605	0.344	5.745	2.62	7.795	1.87	6.55	1.175	1.335	1017	33.4	77.75
8/2/2014 14:00	3	141	17.9	32	0	896	-999	0.099	0.948	320.0909091	1.99	-999	5.23	3.48	13.12	2.17	13.82	3.1	3.66	1869.4	143.8	366.8
8/2/2014 15:00	2.9	139	17.9	35	0	749	-999	0.067	1.246	352.8333333	2.12	0.396	6.71	5.31	17.85	3.09	22.95	4.87	6.15	2680	305.8	771.6
8/2/2014 16:00	2.7	141	18	36	0	658	-999	0.074	1.42	497.8333333	-999	0.673	-999	-999	-999	-999	-999	-999	-999	-999	-999	-999
8/2/2014 17:00	2.3	139	17.6	38	0	448	-999	0.087	1.966	656.2727273	-999	-999	-999	-999	-999	-999	-999	-999	-999	-999	-999	-999
8/2/2014 18:00	2.4	141	16.9	40	0	262	-999	0.107	2.304	697.5833333	4.05	0.225	6.48	6.54	25.19	5.46	38.13	10.04	13.36	4089.2	431.1	1131.2
8/2/2014 19:00	1.5	208	14.6	45	0	30	-999	0.061	1.725	464.1666667	3.415	0.404	5.335	5.035	18.415	4.29	20.84	5.65	6.905	2212.2	357.5	1046.75
8/2/2014 20:00	0.3	277	11.7	55	0	1	-999	0.023	1.489	274.75	-999	-999	-999	-999	-999	-999	-999	-999	-999	-999	-999	-999
8/2/2014 21:00	0.7	330	10.8	57	0	0	-999	0.012	1.245	252.0909091	3.11	0.436	4.63	4.48	16.02	2.99	18.93	5.88	7.77	-999	-999	-999
8/2/2014 22:00	0.5	328	8.9	68	0	0	-999	0.009	1.264	210.0833333	-999	-999	-999	-999	-999	-999	-999	-999	-999	-999	-999	-999
8/2/2014 23:00	0.9	326	8.8	68	0	0	-999	0.002	1.15	179.0833333	3.13	0.601	3.82	4.88	13.26	1.79	17.88	3.6	5.27	-999	-999	-999
8/3/2014 0:00	0.8	327	8.6	70	0	0	-999	-0.012	1.471	177.5	2.74	0.265	3.71	3.99	12.45	1.88	12.58	2.71	3.69	-999	-999	-999
8/3/2014 1:00	1	326	8.3	73	0	0	-999	-0.001	1.187	170.5454545	-999	-999	-999	-999	-999	-999	-999	-999	-999	-999	-999	-999
8/3/2014 2:00	1.4	323	9.1	64	0	0	-999	-0.013	1.259	222.0833333	3.23	0.548	5.38	3.59	12.94	3	14.99	3.4	4.36	-999	-999	-999
8/3/2014 3:00	1.5	313	9.2	62	0	0	-999	-0.007	1.186	221.5833333	2.96	0.365	4.32	3.07	11.09	2.61	12.92	2.99	3.79	-999	-999	-999
8/3/2014 4:00	1.5	323	8.9	59	0	0	-999	-999	-999	192	2.5	0.389	4.11	2.78	9.89	1.61	9.76	2.13	2.93	-999	-999	-999
8/3/2014 5:00	1.5	297	8.7	55	0	0	-999	0.027	0.778	199.4545455	2.27	0.268	3.6	2.58	7.58	1.37	8.36	1.99	2.93	1608.4	122	287.7
8/3/2014 6:00	0.8	318	7.1	65	0	12	-999	0.039	0.585	126.9166667	1.86	0.232	3.35	2.33	8.35	2.49	10.49	1.93	2.49	-999	-999	-999
8/3/2014 7:00	0.6	320	8.9	67	0	154	-999	-999	-999	134.4166667	-999	-999	-999	-999	-999	-999	-999	-999	-999	-999	-999	-999
8/3/2014 8:00	0.6	93	14.8	51	0	419	-999	0.178	2.206	395.9166667	3.83	0.406	4.14	2.95	12.79	3.02	13.58	3.29	4.19	1539.9	136.2	327.7
8/3/2014 9:00	0.9	61	17.3	39	0	605	-999	0.115	1.905	490.3636364	-999	-999	-999	-999	-999	-999	-999	-999	-999	-999	-999	-999
8/3/2014 10:00	1.4	42	19.3	31	0	757	-999	0.066	1.008	317.8333333	1.62	0.374	5.49	2.43	8.58	2.52	8.19	1.74	2.03	1108.8	76.2	156
8/3/2014 11:00	1.6	124	19.7	36	0	910	-999	0.071	1.263	377.25	2.61	0.173	6.61	4.21	15.11	3.31	15.34	3.64	4.52	1975.3	179.6	449.5
8/3/2014 12:00	2.7	142	18.9	41	0	502	-999	0.064	1.558	481.0833333	2.46	0.62	6.26	3.71	13.19	3.08	14.11	3.29	3.89	1697.8	135.9	328.2
8/3/2014 13:00	2.5	154	20.1	34	0	967	-999	0.074	1.366	432.7272727	-999	-999	-999	-999	-999	-999	-999	-999	-999	-999	-999	-999
8/3/2014 14:00	2.5	141	19.4	36	0	464	-999	0.058	1.344	375.8333333	-999	-999	-999	-999	-999	-999	-999	-999	-999	-999	-999	-999
8/3/2014 15:00	1.9	159	18.5	43	0	362	-999	0.108	1.672	457.5833333	-999	-999	-999	-999	-999	-999	-999	-999	-999	-999	-999	-999
8/3/2014 16:00	2.6	143	18.4	39	0	534	-999	0.026	1.03	366.9166667	-999	-999	-999	-999	-999	-999	-999	-999	-999	-999	-999	-999
8/3/2014 17:00	1.2	154	19.1	35	0	377	-999	0.064	0.916	301.6666667	-999	-999	-999	-999	-999	-999	-999	-999	-999	-999	-999	-999
8/3/2014 18:00	1.2	170	17.6	42	0	157	-999	0.051	0.975	283.9090909	1.77	0.299	4.79	2.92	9.12	1.85	10.15	2.29	3.11	1483.2	94.7	239
8/3/2014 19:00	0.9	241	15.3	57	0	41	-999	0.017	0.977	191.9166667	1.72	0.249	4.81	2.44	9.94	1.43	11.06	2.33	3.11	1526.1	157.4	486.9
8/3/2014 20:00	0.5	266	13.7	62	0	2	-999	0.015	1.52	178.3333333	1.89	0.177	5.28	2.7	11.7	2.54	12.65	3.05	4.35	-999	-999	-999
8/3/2014 21:00	0.6	271	12.1	69	0	0	-999	0.034	2.023	290	2.99	0.192	5.9	5.48	24.77	5.51	38.07	9.63	12.95	-999	-999	-999
8/3/2014 22:00	0.5	312	10.9	71	0	0	-999	0.022	1.63	-999	3.33	0.189	5.13	6.55	29.64	6.65	46.61	13.69	17.73	-999	-999	-999
8/3/2014 23:00	0.7	326	10.9	64	0	0	-999	0.025	1.746	-999	3.14	0.141	4.53	6.22	26.72	5.61	39.86	9.93	13.5	-999	-999	-999
8/4/2014 0:00	1	317	11.7	58	0	0	-999	0.015	1.183	180.75	2.8	0.309	3.56	4.22	18.91	3.79	25.35	5.93	7.97	-999	-999	-999
8/4/2014 1:00	1	315	11.7	56	0	0	-999	0.04	1.304	212.9166667	2.93	0.721	4.45	3.79	19.56	3.91	21.78	4.94	6.5	-999	-999	-999
8/4/2014 2:00	1.4	327	10.9	59	0	0	-999	0.015	1.305	210.2727273	-999	-999	-999	-999	-999	-999	-999	-999	-999	-999	-999	-999
8/4/2014 3:00	1.3	286	10.6	57	0	0	-999	-0.002	1.243	223.5833333	2.8	0.277	5.51	3.37	16	3.38	19.65	4.08	5.32	-999	-999	-999
8/4/2014 4:00	1.5	310	10.2	52	0	0	-999	0.019	0.689	181.25	-999	-999	-999	-999	-999	-999	-999	-999	-999	-999	-999	-999
8/4/2014 5:00	1.7	323	10.4	48	0	0	-999	0.001	0.536	124	1.5	0.624	3.47	2.22	7.78	1.54	8.02	1.43	1.79	-999	-999	-999
8/4/2014 6:00	1.4	312	11.2	48	0	21	-999	0.039	0.514	119.8181818	-999	-999	-999	-999	-999	-999	-999	-999	-999	-999	-999	-999
8/4/2014 7:00	1.1	293	11.8	55	0	106	-999	0.297	1.258	126.9166667	1.66	0.412	4.36	1.95	8.35	1.76	8.82	1.51	2.11	-999	-999	-999
8/4/2014 8:00	0.3	21	15.2	55	0	311	-999	0.429	2.268	210.6666667	2.16	0.38	4.51	2.71	10.12	2.58	11.82	2.61	3.34	1525.1	114.4	247.8
8/4/2014 9:00	0.5	15	18.1	40	0	498	-999	0.099	1.313	300.75	1.8	0.451	5.68	2.38	8.88	1.74	8.21	1.72	2.02	1262.4	58.6	130
8/4/2014 10:00	1.6	8	19.1	39	0	619	-999	0.141	1.674	346.8571429	2.34	0.231	6.7	3.07	11.62	2.74	11.46	2.36	2.99	1563.1	110.5	217.1
8/4/2014 11:00	1.3	12	19.5	38	0	484	-999	0.189	1.749	413	-999	-999	-999	-999	-999	-999	-999	-999	-999	-999	-999	-999
8/4/2014 12:00	0.5	148	17.7	52	0.8	130	-999	0.121	2.024	417.3636364	2.23	0.2815	6.23	4.34	16.465	3.76	20.275	4.805	6.655	2677.8	203.75	502.35
8/4/2014 13:00	0.4	203	13.6	78	1.2	85	-999	0.212	2.213	326.75	1.94	0.18	5.46	3.43	14.37	2.47	16.19	3.86	5.38	-999	-999	-999
8/4/2014 14:00	1.2	271	12.2	86	4.5	105	-999	0.178	1.911	286.9166667	2.01	0.31	5.81	4.24	15.05	3.25	16.34	3.82	5.61	-999	-999	-999
8/4/2014 15:00	1	351	13.4	83	0	200	-999	0.206	1.549	301.9166667	-999	-999	-999	-999	-999	-999	-999	-999	-999	-999	-999	-999
8/4/2014 16:00	1.2	323	13	82	0	44	-999	0.232	2.293	270.3636364	2.41	0.424	5.05	3.82	14.96	2.93	17.07	3.83	5.07	2209.4	173.8	392.9
8/4/2014 17:00	1.1	347	11.6	83	0.3	99	-999	0.132	1.304	258.0833333	1.77	0.354	5.97	3.25	10.96	1.87	11.07	2.35	3.05	1592	99.4	223.7
8/4/2014 18:00	1.1	350	11.8	79	0	89	-999	0.028	0.831	260.1666667	1.84	0.356	5.54	3.3	11.11	2.08	11.1	2.34	3.15	1587.2	95.3	185.6
8/4/2014 19:00	1.2	296	12	80	0	41	-999	0.054	0.757	177.75	1.71	0.315	4.84	2.65	10.21	1.93	10.69	2.26	2.81	1564.7	104.9	243.6
8/4/2014 20:00	1.5	289	11.7	79	0	3	-999	0.05	0.704	125.3636364	1.88	0.597	4.89	3.26	10.87	2.75	10.47	2.07	2.75	-999	-999	-999
8/4/2014 21:00	1.5	292	11.6	76	0	0	-999	0.04	0.372	135.4166667	1.66	0.486	6	2.84	9.79	2.19	9.34	1.76	2.32	-999	-999	-999
8/4/2014 22:00	1.3	296	10.8	80	0	0	-999	0.004	0.38	99.83333333	1.74	0.55	4.97	2.66	9.81	2.27	9.16	1.77	2.28	-999	-999	-999
8/4/2014 23:00	1.1	315	9.5	83	0	0	-999	0.019	0.377	101.75	1.59	0.577	4.975	2.505	9.35	1.845	8.535	1.495	1.925	-999	-999	-999
8/5/2014 0:00	1.1	307	9.5	81	0	0	-999	-0.011	0.255	103.4166667	-999	-999	-999	-999	-999	-999	-999	-999	-999	-999	-999	-999
8/5/2014 1:00	1.6	299	9.8	77	0	0	-999	0.011	0.323	111.2727273	1.57	0.569	5.69	2.98	9.91	2.5	9.4	1.64	2.35	-999	-999	-999
8/5/2014 2:00	1.4	302	10.4	76	0	0	-999	-0.003	0.447	112.6666667	1.65	0.448	5.42	2.77	9.51	2.02	9.32	1.7	2.18	1558.7	80.2	140.2
8/5/2014 3:00	1.8	279	11.5	68	0	0	-999	0.048	0.368	107.6666667	1.85	0.432	4.86	3.23	10.03	1.76	11.05	1.81	2.34	1595.6	77.4	158.2
8/5/2014 4:00	0.8	286	10.7	74	0	0	-999	-999	-999	123.25	2.44	0.398	6.11	3.28	11.95	2.62	12.72	2.53	3.37	-999	-999	-999
8/5/2014 5:00	1.2	313	11.6	69	0.2	0	-999	0.01	0.614	126.3636364	2.34	0.511	4.82	3.03	11.32	2.74	11.87	2.49	3.12	-999	-999	-999
8/5/2014 6:00	1	307	10.4	82	0.2	6	-999	0.022	0.913	124	2.32	0.527	5.45	3.16	11.64	2.08	12.17	2.54	3.38	-999	-999	-999
8/5/2014 7:00	1	323	11.4	76	0	58	-999	0.034	0.71	168.5	1.56	0.894	6.94	3.05	10.12	1.76	9.76	1.69	2.16	-999	-999	-999
8/5/2014 8:00	1.1	16	13.2	71	0	343	-999	0.262	1.623	182.5	1.66	0.852	5.79	2.88	10.92	1.91	10.29	1.99	2.56	-999	-999	-999
8/5/2014 9:00	1.7	13	16.2	53	0	547	-999	0.081	0.673	212.2727273	1.35	0.88	7.34	2.66	9.66	1.56	9.5	1.7	1.79	1526.2	68.7	152.5
8/5/2014 10:00	1.6	33	16.1	51	0	386	-999	0.102	0.713	222.0833333	-999	-999	-999	-999	-999	-999	-999	-999	-999	-999	-999	-999
8/5/2014 11:00	1.3	12	16.3	52	0	408	-999	0.112	0.747	221.1666667	1.225	1.0875	6.265	2.485	7.745	1.535	6.36	0.97	1.02	1103.35	49.05	108.2
8/5/2014 12:00	1.4	69	17.1	51	0	751	-999	0.091	0.782	248.8333333	1.61	0.638	6.43	3.67	10.77	1.67	9.43	1.76	1.86	1451.4	63.2	138.9
8/5/2014 13:00	2.5	149	16.1	59	0	250	-999	0.08	1.148	340.5454545	2.44	0.606	6.44	3.98	12.35	2.57	11.81	2.04	2.4	1565.2	67.2	151.1
8/5/2014 14:00	2	175	15.1	65	-999	374	-999	0.089	1.033	315.1666667	1.78	0.92	6.47	2.91	10.88	2.23	10.05	1.59	1.9	1388.4	54.5	110.2
8/5/2014 15:00	1	162	14.4	69	0.7	196	-999	0.074	0.994	318.75	1.86	0.659	5.89	2.86	10.95	1.91	10.32	1.94	2.34	1506.8	72.1	166.1
8/5/2014 16:00	0.9	316	13	79	0.5	182	-999	0.109	0.981	263.25	1.68	0.758	6.91	2.63	8.91	1.8	7.26	1.34	1.47	1202.6	71.5	125.5
8/5/2014 17:00	0.5	237	13.4	76	0.1	278	-999	0.047	0.626	233.5833333	1.4	0.905	5.43	2.29	7.79	1.26	5.55	0.88	1.02	1009.2	41	89
8/5/2014 18:00	1.2	151	13.5	75	0	242	-999	0.083	1.189	251.2727273	1.54	0.906	7.05	2.59	8.81	1.76	7.85	1.42	1.55	1313.9	60.1	139.6
8/5/2014 19:00	0.7	252	11.9	83	0	18	-999	0.074	0.725	163.1666667	-999	-999	-999	-999	-999	-999	-999	-999	-999	-999	-999	-999
8/5/2014 20:00	0.6	290	10.6	84	0	1	-999	0.037	0.541	102.8333333	1.78	1.02	6.25	2.3	6.7	1.4	5.12	0.84	1.08	-999	-999	-999
8/5/2014 21:00	0.9	322	9.8	83	0	0	-999	0.002	0.347	85.66666667	1.12	0.967	4.9	2.66	5.84	1.1	3.83	0.94	0.8	-999	-999	-999
8/5/2014 22:00	1.3	314	10	80	0	0	-999	0.025	0.399	101.6363636	1.235	0.9285	5.655	2	6.195	1.185	4.995	0.925	1.075	-999	-999	-999
8/5/2014 23:00	1.4	315	10.3	83	0.6	0	-999	-0.012	0.483	149.9166667	1.24	1.067	4.82	1.64	5.12	0.91	3.54	0.63	0.58	930.3	65.9	138.5
8/6/2014 0:00	1.6	297	10.2	79	0	0	-999	0.008	0.407	121.9166667	1.18	1.019	5.36	2.16	5.11	1.06	3.14	0.55	0.7	-999	-999	-999
8/6/2014 1:00	0.6	274	9.9	78	0.1	0	-999	0.025	0.355	121.3333333	4.8	1.073	5.47	1.88	4.87	1	3.74	0.57	0.73	854.8	87.4	280.6
8/6/2014 2:00	1.6	313	12.3	64	0	0	-999	-0.008	0.354	137.1818182	1.47	1.422	7.2	2.06	5.27	0.72	3.24	0.49	0.48	-999	-999	-999
8/6/2014 3:00	2.7	300	13	57	0	0	-999	-0.001	0.377	174.5833333	1.3	1.247	6.18	2.28	5.17	0.92	2.96	0.58	0.58	750	44.3	91.6
8/6/2014 4:00	3.7	289	13.6	54	0	0	-999	0.034	0.522	195.75	-999	-999	-999	-999	-999	-999	-999	-999	-999	-999	-999	-999
8/6/2014 5:00	2.4	317	13	55	0	0	-999	0.03	0.618	196.5	1.31	1.231	6.49	2.5	5.38	1.44	3.32	0.59	0.56	889.7	48.4	74.6
8/6/2014 6:00	3.1	293	13	55	0	24	-999	0.028	0.606	168.6363636	1.23	0.999	5.9	1.89	4.97	1.46	2.69	0.66	0.65	824.3	47.5	88.6
8/6/2014 7:00	4.8	287	14.4	50	0	163	-999	0.065	0.507	195.6666667	1.41	0.901	5.9	2.14	4.87	1.02	2.64	0.55	0.37	736.4	31.4	54.5
8/6/2014 8:00	4.1	308	14.2	49	0	167	-999	0.132	0.816	180.5833333	1.36	0.837	5.96	1.95	4.49	0.79	2.51	0.42	0.27	682.3	28.9	96.8
8/6/2014 9:00	3.5	303	15.8	44	0	569	-999	0.084	0.684	192.0833333	1.4	0.879	5.55	2.19	4.96	0.87	2.72	0.56	0.62	721.8	33.2	50.3
8/6/2014 10:00	3.4	334	16.5	43	0	729	-999	0.076	0.675	210.5	1.33	0.749	5.895	2.21	5.375	0.75	2.565	0.355	0.225	-999	-999	-999
8/6/2014 11:00	2.2	322	17.1	42	0	772	-999	0.087	0.631	201.3636364	1.44	0.834	6.1	1.97	4.67	0.91	2.57	0.46	0.34	670.5	27.6	47.8
8/6/2014 12:00	1.8	309	17.4	39	0	628	-999	0.02	0.487	197.75	1.39	0.802	7.41	1.8	4.23	1.04	2.46	0.38	0.29	674.6	38.5	50.7
8/6/2014 13:00	1.6	318	17.5	36	0	490	-999	0.013	0.454	205.9166667	-999	-999	-999	-999	-999	-999	-999	-999	-999	-999	-999	-999
8/6/2014 14:00	2.1	298	19.2	29	0	653	-999	0.018	0.421	199.4166667	1.65	0.781	6.36	2	3.97	0.85	1.81	0.49	0.34	627.1	16.9	22.3
8/6/2014 15:00	2.1	257	18.2	32	0	214	-999	0.043	0.392	187.8181818	1.81	0.685	5.85	1.8	3.58	1.06	2.09	0.39	0.38	620.6	25.9	63.7
8/6/2014 16:00	2.9	273	18.3	30	0	538	-999	0.019	0.38	216.6666667	1.57	0.57	6.17	2	3.38	1.24	1.87	0.3	0.23	572.1	20.8	40
8/6/2014 17:00	2.8	285	18.9	29	0	482	-999	0.025	0.342	192.4166667	1.45	0.568	5.03	1.52	4.26	0.8	1.38	0.33	0.25	574.1	23.3	52.8
8/6/2014 18:00	1.2	331	18.3	32	0	271	-999	0.032	0.547	215.4166667	1.46	0.505	5.89	1.8	3.88	0.87	2.12	0.29	0.17	592.5	22.2	41.8
8/6/2014 19:00	1.3	280	15.3	46	0	23	-999	0.087	0.608	151.1818182	1.45	0.567	5.47	1.47	4.51	1.02	1.82	0.31	0.35	-999	-999	-999
8/6/2014 20:00	0.7	336	13.5	54	0	1	-999	0.016	0.924	124.5833333	1.36	0.703	4.6	1.82	3.85	0.98	2.07	0.4	0.47	-999	-999	-999
8/6/2014 21:00	1.2	311	14.2	62	0	0	-999	0.043	1.963	242.75	2.56	0.521	6.29	3.08	10.21	2.34	13.92	3.87	5.88	3868.2	507.9	1385.7
8/6/2014 22:00	0.8	283	12.7	61	0	0	-999	0.002	1.129	155	2.08	0.644	5.34	2.51	8.59	2.23	9.95	2.72	3.78	-999	-999	-999
8/6/2014 23:00	1	274	11.2	62	0	0	-999	0.038	0.532	104.1818182	-999	-999	-999	-999	-999	-999	-999	-999	-999	-999	-999	-999
8/7/2014 0:00	0.8	295	10.2	68	0	0	-999	0.028	0.607	91.33333333	1.57	0.639	5.62	1.72	4.65	1.57	3.21	0.79	1.14	-999	-999	-999
8/7/2014 1:00	0.8	306	9.3	76	0	0	-999	0.014	0.831	72.92857143	1.99	0.512	4.83	1.89	5.86	1.11	6.14	1.37	1.92	-999	-999	-999
8/7/2014 2:00	1.2	282	9.4	73	0	0	-999	0.016	0.704	-999	1.97	0.622	6.08	2.67	7.96	2.05	8.52	2.34	3.51	2664.3	303.7	789.5
8/7/2014 3:00	1.5	283	9.1	68	0	0	-999	0.019	0.531	74.875	1.63	0.5655	6.69	1.86	5.58	1.38	5.81	1.255	1.895	-999	-999	-999
8/7/2014 4:00	1.4	290	8.8	63	0	0	-999	-999	-999	69.63636364	1.35	0.68	6.47	1.82	3.75	1.06	3.52	0.83	1	1058.6	88.1	181.2
8/7/2014 5:00	0.9	307	8.7	63	0	0	-999	0.017	0.318	69.70833333	1.24	0.64	6.16	1.66	3.97	0.57	2.49	0.49	0.56	-999	-999	-999
8/7/2014 6:00	1	312	8.9	61	0	16	-999	0.023	0.493	75.75	1.28	0.637	5.77	1.59	3.74	0.8	2.54	0.66	0.84	-999	-999	-999
8/7/2014 7:00	1.2	339	10.4	62	0	145	-999	-999	-999	69.54545455	1.25	0.589	6.29	1.64	4.17	0.96	2.36	0.5	0.9	-999	-999	-999
8/7/2014 8:00	1.4	27	15.4	47	0	418	-999	0.219	0.995	138.4545455	-999	-999	-999	-999	-999	-999	-999	-999	-999	-999	-999	-999
8/7/2014 9:00	1	38	16.6	41	0	409	-999	0.147	0.917	145.7916667	1.29	0.654	6.42	1.84	4.01	0.53	3.03	0.58	0.79	888.7	70.7	95.5
8/7/2014 10:00	1	48	15.3	51	0	369	-999	0.127	1.083	200.875	1.89	0.495	6.4	2.16	5.84	1.35	5.85	1.32	1.84	1126.3	98.1	200
8/7/2014 11:00	2.6	22	15.7	48	0	659	-999	0.181	0.959	186.5	1.36	0.541	6.39	1.54	4.81	0.88	3.42	0.88	1.04	891.8	69.1	142.9
8/7/2014 12:00	1.7	7	13.1	63	0	168	-999	-999	-999	189.8636364	1.6	0.546	6.7	1.9	5.25	1.24	4.28	0.96	1.15	1060.8	71.7	146.4
8/7/2014 13:00	2.3	16	14.5	58	0	852	-999	-999	-999	159.2083333	1.5	0.542	6.27	1.76	4.66	0.97	2.99	0.49	0.67	857.5	48.1	71.3
8/7/2014 14:00	0.7	77	16.8	49	0	889	-999	0.075	0.783	159.7083333	1.29	0.614	5.97	1.59	4.18	0.68	2.21	0.49	0.48	852.2	48.8	82.4
8/7/2014 15:00	0.6	149	18.9	32	0	813	-999	0.045	0.569	149.3333333	1.21	0.604	6.55	1.28	3.43	0.72	1.45	0.31	0.18	593.5	19.1	31.4
8/7/2014 16:00	2.5	332	18.7	33	0	515	-999	0.059	0.571	127.9545455	1.19	0.571	6.16	1.39	3.38	0.83	1.79	0.29	0.3	-999	-999	-999
8/7/2014 17:00	0.4	199	17.4	44	0	350	-999	0.052	0.594	143.25	1.37	0.495	6.03	1.9	4.57	0.52	2.55	0.69	0.74	770.7	36.8	72
8/7/2014 18:00	1.5	321	15.1	48	0	145	-999	0.045	0.658	179.75	1.74	0.539	6.43	2.23	6.14	1.35	4.93	1.07	1.33	893	58	123.5
8/7/2014 19:00	1.1	274	12.8	54	0	15	-999	0.045	0.638	130.9583333	1.32	0.595	6.17	1.51	3.45	0.52	2.14	0.32	0.32	694.9	40.1	66.9
8/7/2014 20:00	1.1	232	11.1	63	0	1	-999	0.021	0.776	107.0909091	2.52	0.66	5.58	1.52	3.88	0.79	2.28	0.44	0.52	-999	-999	-999
8/7/2014 21:00	0.5	263	9.5	73	0	0	-999	0.038	1.364	136.7916667	1.71	0.59	5.8	1.64	4.79	0.79	3.38	0.84	1.05	-999	-999	-999
8/7/2014 22:00	0.7	287	8.5	81	0	0	-999	0.019	1.487	137.25	2.75	0.487	5.59	2.61	10.26	1.96	12.99	3.71	5.71	-999	-999	-999
8/7/2014 23:00	1.2	298	8.8	77	0	0	-999	-0.023	0.975	148.75	2.62	0.447	5.24	2.62	10.62	1.97	15.18	4.24	6.26	-999	-999	-999
8/8/2014 0:00	1.6	304	8	74	0	0	-999	-0.003	0.616	123.6153846	1.97	0.583	5.88	2.07	7.34	1.24	9.27	2.37	3.37	1776.9	185.7	458
8/8/2014 1:00	1.1	313	7.1	80	0	0	-999	-0.002	0.873	131	2.44	0.557	5.26	2.48	9.54	1.85	13.03	3.44	5.3	-999	-999	-999
8/8/2014 2:00	0.7	300	6.7	77	0	0	-999	0.001	0.754	119.75	1.96	0.48	5.34	1.89	6.3	1.09	7.4	1.82	2.42	-999	-999	-999
8/8/2014 3:00	1.5	322	6.7	66	0	0	-999	0.001	0.38	80.75	1.44	0.534	4.25	1.46	3.98	0.58	2.87	0.77	0.85	-999	-999	-999
8/8/2014 4:00	1.9	299	7.4	58	0	0	-999	0.03	0.21	91.16666667	1.36	0.519	4.98	1.54	3.18	0.81	2.54	0.69	0.63	759.5	48.6	95.7
8/8/2014 5:00	1.5	308	6.6	61	0	0	-999	0.017	0.311	80.72727273	1.46	0.469	4.56	1.82	3.7	1.3	2.55	0.54	0.59	-999	-999	-999
8/8/2014 6:00	1.4	303	7	60	0	21	-999	0.068	0.473	70.33333333	1.4	0.686	4.48	1.41	3.69	0.75	2.2	0.57	0.67	-999	-999	-999
8/8/2014 7:00	0.9	339	9	60	0	118	-999	0.292	1.172	74.75	1.58	0.783	4.83	1.39	4.36	0.55	3.47	0.62	0.85	-999	-999	-999
8/8/2014 8:00	0.8	17	13.4	48	0	361	-999	0.499	2.053	120.1666667	-999	-999	-999	-999	-999	-999	-999	-999	-999	-999	-999	-999
8/8/2014 9:00	0.5	45	16.6	33	0	584	-999	0.375	1.456	140	1.29	0.725	6.6	1.7	3.66	0.71	2.42	0.59	0.58	658.9	34.8	58.7
8/8/2014 10:00	1.8	239	17.5	27	0	686	-999	0.012	0.594	136.1666667	1.35	0.965	6.39	1.59	3.85	0.88	2.48	0.51	0.78	637.3	44.8	52.4
8/8/2014 11:00	1.4	241	18.1	27	0	708	-999	0.015	0.605	125	1.35	0.715	6.5	1.84	3.49	0.79	1.98	0.21	0.24	581	23.1	41.1
8/8/2014 12:00	1.3	291	18.6	26	0	659	-999	0.022	0.655	145.5454545	1.28	0.763	6.16	1.51	3.48	0.68	1.73	0.46	0.45	573.7	19.8	32.3
8/8/2014 13:00	1	263	18.7	27	0	526	-999	0.04	0.731	145.4166667	1.27	0.705	6.36	1.71	3.91	0.88	1.76	0.3	0.33	633.1	23.2	38.1
8/8/2014 14:00	1.5	23	17.7	39	0	543	-999	0.079	1.333	291.5	3.26	0.351	6.37	3.35	12.18	2.63	16.82	4.22	5.6	2106	238.3	634.7
8/8/2014 15:00	2.7	276	17.1	35	0	647	-999	0.139	1.18	252.0833333	1.31	0.458	5.71	1.87	4.84	1.26	3.45	0.65	0.8	672.6	26	49.3
8/8/2014 16:00	1.2	128	18.9	30	0	605	-999	0.064	0.846	182.0833333	1.51	0.591	6.2	1.82	4.78	1.04	4.09	0.91	0.94	889	57.6	142.6
8/8/2014 17:00	1.5	179	18.4	39	0	495	-999	0.077	2.128	446.7272727	4.06	0.349	7.53	5.48	23.39	4.51	40.7	10.69	13.92	5899.3	635.1	1656.9
8/8/2014 18:00	2.1	163	17.3	47	0	268	-999	0.102	3.883	762.75	-999	-999	-999	-999	-999	-999	-999	-999	-999	-999	-999	-999
8/8/2014 19:00	1.4	218	14.5	59	0	17	-999	0.038	3.295	684.4166667	5.86	0.715	9.34	8.85	38.99	9.42	66.51	19.37	26.77	9022.9	1033.6	2685.1
8/8/2014 20:00	0.7	245	12.5	65	0	1	-999	0.013	2.75	386.8333333	4.74	0.234	7.2	6.97	32.12	6.94	52.1	14.94	20.54	7802.9	933.6	2484.9
8/8/2014 21:00	0.8	283	10.6	67	0	0	-999	0.013	1.599	215.5454545	4.46	0.38	7.36	6.88	31.15	6.7	52.33	15.22	22.36	-999	-999	-999
8/8/2014 22:00	0.9	298	9.9	66	0	0	-999	0.015	1.479	166.5833333	2.34	0.372	5.19	2.88	12.82	2.1	17.49	5.12	7.75	-999	-999	-999
8/8/2014 23:00	1.4	321	10.5	60	0	0	-999	0.012	1.186	192.3333333	2.175	0.4105	5.37	3.175	12.015	2.51	16.86	4.59	6.72	-999	-999	-999
8/9/2014 0:00	1.1	275	10.5	58	0	0	-999	0.028	0.619	121.0833333	1.97	0.407	4.81	2.41	8.28	1.46	7.91	2.3	3.31	-999	-999	-999
8/9/2014 1:00	0.9	291	10.1	61	0	0	-999	-0.002	0.608	116.8181818	1.77	0.467	4.77	2.39	8.52	1.45	8.74	2.42	3.59	-999	-999	-999
8/9/2014 2:00	1.2	312	9.8	60	0	0	0.743777067	-0.001	0.647	105.75	1.63	0.562	4.45	2.12	7.76	1.2	6.77	1.55	2.35	-999	-999	-999
8/9/2014 3:00	1.5	327	11.2	54	0	0	0.759836786	-0.028	0.633	148.8333333	-999	-999	-999	-999	-999	-999	-999	-999	-999	-999	-999	-999
8/9/2014 4:00	1.4	308	11.1	55	0	0	0.675470579	-999	-999	162.1666667	1.56	0.314	4.58	2.28	6.21	1.02	5.13	1.42	1.67	-999	-999	-999
8/9/2014 5:00	1.2	309	10.7	56	0	0	0.618203984	0.019	0.863	154.3636364	1.74	0.448	4.66	2.23	6.96	1.24	5.89	1.53	2.07	1849.5	135.7	298.6
8/9/2014 6:00	1.3	274	8.4	66	0	14	0.568536417	0.019	0.568	88.58333333	1.75	0.415	4.85	2.18	6.89	0.98	5.04	1.24	1.75	-999	-999	-999
8/9/2014 7:00	0.5	292	9.7	66	0	111	0.543138456	0.062	0.8	107.8333333	1.61	0.373	5.4	2.17	6.83	1.24	4.94	1.31	1.74	-999	-999	-999
8/9/2014 8:00	0.8	302	13.9	51	0	200	0.519562844	0.124	1.153	307.8	1.59	0.398	5.05	2.2	6.56	1.3	3.93	0.8	0.94	1563.8	95.6	260.8
8/9/2014 9:00	2.1	342	16.1	42	0	466	0.617072426	0.072	1.106	313.4545455	1.59	0.397	5.28	2.8	7.07	1.43	4.89	1.13	1.34	1795.4	113.3	217.4
8/9/2014 10:00	2.2	336	17.2	37	0	726	0.894628936	0.09	1.062	322.25	1.65	0.26	6.05	2.67	6.84	1.58	4.9	1.02	1.19	1613.8	92.4	174.1
8/9/2014 11:00	1.6	283	18.1	32	0	715	1.390972627	0.066	0.891	298	1.46	0.416	6.85	2.49	6.06	1.45	4.38	1.02	0.99	1386.7	69.1	124.7
8/9/2014 12:00	1.4	344	17.3	39	0	548	1.587066413	0.113	1.063	311.7272727	1.5	0.36	4.89	2.21	6.43	1.33	4.44	1.1	1.19	1406.9	85.6	183.1
8/9/2014 13:00	3.2	286	17.2	34	0	481	1.285678517	0.077	0.83	306.8333333	-999	-999	-999	-999	-999	-999	-999	-999	-999	-999	-999	-999
8/9/2014 14:00	2.1	282	18.7	30	0	861	1.149393877	0.015	0.624	261.1666667	1.44	0.413	5.3	2.1	4.6	1.22	2.52	0.5	0.57	989	32.2	64.7
8/9/2014 15:00	2.4	301	18.5	32	0	586	1.303043217	0.047	0.645	235.25	1.55	0.337	4.51	2.07	5.15	1.27	2.55	0.45	0.38	996.5	27	57.3
8/9/2014 16:00	1.4	324	17.8	34	0	479	1.301440696	0.054	0.679	231.9090909	1.49	0.254	4.78	2.01	4.57	0.85	2.67	0.58	0.41	929.2	25.2	63.3
8/9/2014 17:00	2.5	150	16.9	46	0	391	1.157395907	0.095	1.265	301.6666667	2.4	0.266	6.29	3.27	10.7	2.43	12.61	2.87	2.99	2087.9	178.1	464.9
8/9/2014 18:00	1.7	180	15.8	50	0	142	1.094133922	0.056	1.17	322.0833333	2.03	0.3	5.94	3.52	9.58	2.47	11.4	2.73	3.68	1912.5	152	398.4
8/9/2014 19:00	0.3	24	14.4	57	0	24	0.991210075	0.019	1.282	294.75	2.31	0.315	5.73	3.24	9.54	2.08	10.7	2.64	3.27	1985.5	164.9	424.9
8/9/2014 20:00	1.2	221	13.5	59	0	1	0.869444008	0.01	1.224	275.5454545	2.7	0.458	5.44	3.05	9.19	2.21	9.67	2.4	3.23	1967.6	179.6	474.3
8/9/2014 21:00	0.5	308	12.5	65	0	0	0.775566227	0.045	1.514	274.5833333	3.2	0.305	5.58	2.91	9.02	1.88	10.12	2.33	2.93	2141.9	203.3	572.7
8/9/2014 22:00	0.3	12	11.8	67	0	0	0.71438317	0.154	1.633	236.75	2.41	0.323	5.32	2.68	8.47	1.59	8.02	1.8	1.86	1871.3	172.4	394.6
8/9/2014 23:00	0.8	277	9.9	74	0	0	0.655345948	0.009	1.305	171.4166667	-999	-999	-999	-999	-999	-999	-999	-999	-999	-999	-999	-999
8/10/2014 0:00	0.8	309	9	76	0	0	-999	0.024	1.355	146.1818182	2.81	0.448	4.39	2.76	8.41	1.79	8.28	2.12	2.92	-999	-999	-999
8/10/2014 1:00	0.8	295	8.5	77	0	0	-999	0.002	1.001	141.0833333	2.9	0.296	5.04	2.86	8.79	1.84	8.61	2.11	3.31	-999	-999	-999
8/10/2014 2:00	0.3	312	9.2	76	0	0	0.432859157	-0.015	1.024	156.6666667	3.06	0.337	4.72	2.69	9.2	2.15	8.78	1.97	3.03	-999	-999	-999
8/10/2014 3:00	0.6	267	8.6	80	0	0	0.467078318	-0.001	0.9	132	2.88	0.37	5.355	2.9	8.71	1.8	7.925	1.765	2.47	-999	-999	-999
8/10/2014 4:00	1	288	7.2	83	0	0	0.459651824	0.011	0.897	116.4545455	1.7	0.365	4.64	2.54	8.33	1.45	7.44	1.44	1.82	-999	-999	-999
8/10/2014 5:00	0.9	268	6.7	85	0	0	0.399667375	0.002	0.806	111	1.64	0.463	4.49	2.65	8.5	1.88	7.05	1.38	1.93	-999	-999	-999
8/10/2014 6:00	1.2	297	6.8	83	0	14	0.362479486	0.031	0.763	112.0833333	1.67	0.399	4.67	2.52	8.32	1.74	6.91	1.26	1.84	-999	-999	-999
8/10/2014 7:00	0.5	346	7.6	85	0	135	0.332084728	1.06	3.442	118.5	1.62	0.595	6.46	2.72	9.01	1.87	7.22	1.45	1.9	-999	-999	-999
8/10/2014 8:00	1.5	121	11.6	71	0	386	0.313600032	0.176	1.333	247.4545455	-999	-999	-999	-999	-999	-999	-999	-999	-999	-999	-999	-999
8/10/2014 9:00	1.9	124	12.9	65	0	571	0.338301187	0.083	1.175	309.0833333	1.63	0.417	5.47	3	9.22	2.1	8.94	1.71	2.35	1637.4	110.8	264.2
8/10/2014 10:00	2.3	137	13.5	64	0	592	0.470251198	0.071	0.99	279.6666667	1.53	0.345	5.31	2.98	9	1.92	7.79	1.53	1.58	1574.4	101.2	236.9
8/10/2014 11:00	2.3	138	14.2	61	0	554	0.72706599	0.063	0.915	305.5833333	1.64	0.438	5.79	3.24	8.72	2.35	7.4	1.65	2.42	1528.2	82.5	197.8
8/10/2014 12:00	0.7	140	12.2	72	6.4	126	0.94463537	0.057	0.836	261.75	1.7	0.386	5.45	2.99	9.09	1.74	7.84	1.48	1.89	1448	96.1	263.3
8/10/2014 13:00	0.3	183	11.5	85	0	214	0.978353266	0.11	0.827	226.0909091	1.62	0.515	5.64	2.96	8.75	1.92	6.97	1.37	2.07	1391.9	77.2	170.6
8/10/2014 14:00	1.3	153	12.2	83	0.3	215	0.933007774	0.063	0.958	293.5833333	2.04	0.343	5.96	3.31	9.89	2.21	8.97	1.85	2.45	1467.1	74.6	182.8
8/10/2014 15:00	0.2	214	10.2	88	1.8	199	0.882035485	0.082	1.124	322.1666667	2.1	0.322	5.1	3.09	9.34	1.92	8.27	1.72	2.19	1335.7	76.5	166.1
8/10/2014 16:00	1.2	138	11.6	84	0	302	0.808205201	0.098	1.04	317.4166667	1.95	0.285	5.6	3.36	9.87	1.92	9.01	1.97	2.5	1480.9	82.7	209.1
8/10/2014 17:00	0.8	146	12.1	84	0	232	0.772276238	0.091	1.159	306.3636364	2.16	0.278	6.56	3.53	11.13	2.41	11.4	2.23	2.85	1694	113.4	316
8/10/2014 18:00	0.8	169	12.1	84	0	141	0.753881271	0.063	0.977	273	-999	-999	-999	-999	-999	-999	-999	-999	-999	-999	-999	-999
8/10/2014 19:00	0.8	252	10.7	89	0	28	0.704021935	0.044	0.761	168.5	2.28	0.323	5.79	3.38	11.11	2.78	10.03	2.29	3.31	1672.4	125.4	374.6
8/10/2014 20:00	0.7	320	8.8	90	0	1	0.649637768	0.128	1.121	100.6666667	1.97	0.34	4.84	2.94	9.83	1.72	10.06	2.04	3.15	-999	-999	-999
8/10/2014 21:00	1.1	331	7.7	89	0	0	0.551572439	0.044	0.864	90	1.78	0.455	4.52	2.65	8.48	1.71	8.08	1.74	2.46	-999	-999	-999
8/10/2014 22:00	1.2	335	7.6	84	0	0	0.462605876	0.014	0.511	113.9166667	1.86	0.329	4.56	2.66	8.02	1.24	7.52	1.48	2.17	-999	-999	-999
8/10/2014 23:00	1	331	6.9	85	0	0	0.388318214	0.029	0.67	91.5	1.74	0.338	3.88	2.41	7.22	1.67	6.97	1.33	1.72	-999	-999	-999
8/11/2014 0:00	1.1	336	6.6	85	0	0	-999	0.043	0.413	78.33333333	1.64	0.4375	4.9	2.29	6.535	1.79	5.46	0.88	1.235	-999	-999	-999
8/11/2014 1:00	1.3	338	6.6	82	0	0	-999	0.044	0.35	84.09090909	1.51	0.365	3.42	1.74	5.85	1.4	4.13	0.71	0.98	-999	-999	-999
8/11/2014 2:00	1.4	312	6.6	81	0	0	0.291303687	0.015	0.271	99.66666667	1.53	0.378	3.95	2.36	6.79	1.7	4.97	0.93	1.28	-999	-999	-999
8/11/2014 3:00	1.6	294	6.4	78	0	0	0.28055588	0.051	0.314	97.66666667	-999	-999	-999	-999	-999	-999	-999	-999	-999	-999	-999	-999
8/11/2014 4:00	1.4	319	6	79	0	0	0.274248656	-999	-999	88.58333333	1.44	0.429	4.48	2.01	5.19	1.09	3.49	0.73	0.97	-999	-999	-999
8/11/2014 5:00	1.7	315	6.2	76	0	0	0.255098524	0.013	0.309	101.5	1.66	0.463	4.73	2.53	6.53	1.26	5.82	1.38	1.65	-999	-999	-999
8/11/2014 6:00	1.3	296	6	75	0	10	0.212679287	0.008	0.352	100.8181818	1.53	0.339	4.4	1.96	5.18	1.41	4.65	0.85	1.22	-999	-999	-999
8/11/2014 7:00	1.2	323	8.7	68	0	139	0.191253935	-999	-999	93.66666667	1.48	0.406	4.42	2.39	5.48	1.36	5.01	0.68	0.92	-999	-999	-999
8/11/2014 8:00	0.4	49	12	66	0	409	0.156571485	1.491	4.015	184.8333333	1.53	0.235	4.12	1.97	6.43	1.69	5.97	1.53	2.01	1290.9	83.2	176.3
8/11/2014 9:00	1	119	14.9	47	0	594	0.183514892	0.087	0.899	258.1666667	1.74	0.268	5.6	2.87	8.63	1.8	9.65	2.38	3.32	1582.9	103.1	259.7
8/11/2014 10:00	1.6	129	15.9	43	0	763	0.37890558	0.01	0.707	268.7272727	1.82	0.304	5.45	2.83	8.78	1.91	10.66	2.43	2.93	1582.2	103.9	272.7
8/11/2014 11:00	1.6	118	16.9	41	0	899	0.658745275	0.089	0.798	262.25	1.69	0.326	5.19	2.69	8.97	1.53	9.83	2.23	2.53	1600.4	104.9	266.1
8/11/2014 12:00	2.4	124	17.3	45	0	955	0.809698611	0.099	0.947	314.0833333	1.59	0.382	5.14	2.64	9.95	2.44	12.29	3	4.09	1788.5	120	313.4
8/11/2014 13:00	2.9	135	17.9	43	0	987	1.783196916	0.1	1.362	337.6666667	1.96	0.254	5.31	3.23	11.26	2.13	13.11	2.85	3.95	1707.8	100.2	259
8/11/2014 14:00	2.5	144	18.3	43	0	893	2.30691633	0.107	2.006	484.7272727	3.17	0.157	5.77	3.64	13	2.62	16.35	3.49	4.66	1781.2	105.3	268.3
8/11/2014 15:00	2.4	144	18.1	43	0	724	2.152866592	0.066	2.216	526.25	4.4	0.168	7.3	4.12	15.06	3.32	18.85	4.05	5.26	1815.1	100.8	264
8/11/2014 16:00	2.4	138	18	42	0	580	1.75516392	0.093	2.942	612.5	4.45	0.155	6.59	5.01	15.28	3.28	18.65	4.23	4.84	1830.6	106.9	249.6
8/11/2014 17:00	2.5	143	17.4	40	0	285	1.346211834	0.086	3.258	661.9166667	4.47	0.166	7.92	4.61	15.84	3.36	18.77	4.33	4.82	1868.5	120	283.5
8/11/2014 18:00	1.3	198	16.2	45	0	159	1.077441019	0.083	2.604	610.0909091	4.89	0.226	7.49	5.21	18.63	3.9	24.36	5.81	6.5	2415	223.7	564.5
8/11/2014 19:00	1.4	224	13.7	51	0	18	0.858064958	0.028	1.972	433.9166667	5.63	0.158	6.43	4.945	18.595	4.12	26.19	6.715	8.615	-999	-999	-999
8/11/2014 20:00	0.8	260	11	60	0	1	0.710198994	0.001	1.753	245	-999	-999	-999	-999	-999	-999	-999	-999	-999	-999	-999	-999
8/11/2014 21:00	0.4	282	9.2	66	0	0	0.598995354	0.003	1.757	186.9166667	4.6	0.226	5.62	4.47	15.91	4.03	19.77	5.9	8.76	-999	-999	-999
8/11/2014 22:00	0.7	324	8.8	64	0	0	0.490381371	0.015	1.428	150.2727273	3.93	0.157	3.92	3.4	12.11	3.65	14.5	3.95	5.74	-999	-999	-999
8/11/2014 23:00	1	324	9.3	62	0	0	0.411265688	0.036	1.607	230.6666667	5.24	0.3	4.7	3.69	13.48	2.36	15.48	4.6	6.04	-999	-999	-999
8/12/2014 0:00	1.4	296	10.2	59	0	0	-999	-0.006	1.696	351.5	4.89	0.186	5.59	4.05	13.23	3.88	15.34	4.33	6.08	-999	-999	-999
8/12/2014 1:00	1.4	289	9.9	60	0	0	-999	-0.004	1.401	286.5833333	4.75	0.198	5.8	4.02	13.41	3.74	15.98	4.39	6.05	-999	-999	-999
8/12/2014 2:00	1.6	301	9.4	58	0	0	0.277262118	0	0.906	224	2.94	0.317	4.94	3.21	10.45	3.26	11.32	2.83	4.05	1409.8	93.9	212.3
8/12/2014 3:00	1.7	302	9.6	55	0	0	0.257778799	0.035	0.695	180.0833333	2.73	0.354	4.71	2.74	7.9	2.86	8.67	2.08	2.81	1185.7	71.6	143
8/12/2014 4:00	1.7	309	9.5	51	0	0	0.220993327	0.005	0.338	112.4166667	1.68	0.315	4.91	2.31	5.81	0.91	4.56	0.76	1.14	-999	-999	-999
8/12/2014 5:00	1.8	311	9.7	49	0	0	0.187114004	-0.006	0.219	100.5833333	1.44	0.334	4.85	2.02	4.35	0.94	2.95	0.55	0.76	-999	-999	-999
8/12/2014 6:00	2.1	310	9.9	49	0	11	0.152705216	0.025	0.339	104.5	-999	-999	-999	-999	-999	-999	-999	-999	-999	-999	-999	-999
8/12/2014 7:00	0.8	329	9.4	62	0	130	0.13690459	0.115	0.746	79.63636364	1.42	0.42	4.9	1.88	4.23	0.96	2.41	0.37	0.77	-999	-999	-999
8/12/2014 8:00	0.6	20	14.8	51	0	397	0.139137742	0.489	1.988	118.75	1.44	0.309	3.71	1.87	5.05	1.35	2.75	0.88	1.29	-999	-999	-999
8/12/2014 9:00	1.2	109	18.5	30	0	570	0.125773797	0.072	0.79	179.3333333	1.31	0.358	4.66	1.98	4.54	0.89	2.77	0.7	0.9	893.6	32	58.8
8/12/2014 10:00	0.9	75	18.8	28	0	465	0.535106366	0.061	0.712	186.25	1.37	0.34	5.66	2.27	5.18	0.75	3.29	0.66	0.65	948.4	25.8	55.6
8/12/2014 11:00	1.4	72	20.1	26	0	919	0.876404197	0.072	0.648	204.6	1.35	0.324	6.55	1.98	4.34	0.79	2.62	0.41	0.44	880.7	28.8	41.8
8/12/2014 12:00	2.7	151	20.8	29	0	996	1.219145973	0.077	0.788	178.4166667	1.81	0.298	5.03	2.15	5.43	1.33	4.5	0.91	0.97	1026	40	91
8/12/2014 13:00	2.7	132	20.5	29	0	813	1.094524796	0.045	0.976	223.8333333	2.29	0.235	5.97	2.79	7.95	1.71	7.34	1.57	1.97	1307	63.9	161.7
8/12/2014 14:00	2.6	130	20.3	33	-999	646	0.978496173	0.063	2.03	468.9166667	4.115	0.237	6.1	3.625	11.8	2.595	13.55	3.09	3.47	1663.95	115.4	262.05
8/12/2014 15:00	3.3	130	20.6	34	-999	707	0.808587155	0.113	3.055	692	-999	-999	-999	-999	-999	-999	-999	-999	-999	-999	-999	-999
8/12/2014 16:00	3	129	20.3	32	0	481	0.71212365	0.19	4.837	733.7	-999	-999	-999	-999	-999	-999	-999	-999	-999	-999	-999	-999
8/12/2014 17:00	3.1	123	19.8	33	0	334	0.656113697	0.077	3.297	-999	4.77	0.346	7.07	4.83	16.11	3.45	19.26	5.11	6.04	1953.2	156.1	372.9
8/12/2014 18:00	3.2	125	19.3	34	0	207	0.555589935	0.048	2.857	-999	3.8	0.143	6.78	4.35	14.62	3.25	17.45	4.21	4.72	1948.6	151	356.1
8/12/2014 19:00	1.3	188	16.8	41	0	17	0.502822882	0.021	2.212	-999	3.44	0.2365	6.705	4.44	14.83	3.195	17.825	4.125	4.375	2460.65	217.45	553.25
8/12/2014 20:00	0.9	186	14.8	47	0	0	0.453455208	0.007	2.024	-999	3.71	0.276	5.31	3.78	13.75	2.8	16.7	4.15	5.99	-999	-999	-999
8/12/2014 21:00	1.1	185	14.1	47	0	0	0.382797203	0.048	2.552	-999	3.58	0.265	5.65	3.93	12.25	2.36	13.58	3.28	4.13	-999	-999	-999
8/12/2014 22:00	0.9	210	13.4	47	0	0	0.344723265	0.024	2.506	-999	3.96	0.27	5.37	3.33	10.66	2.08	11.22	2.49	3.29	-999	-999	-999
8/12/2014 23:00	0.8	264	10.9	54	0	0	0.307395061	-0.002	2.181	-999	3.43	0.291	4.74	3.07	8.84	1.57	8.58	1.72	2.41	-999	-999	-999
8/13/2014 0:00	1.1	319	11.9	53	0	0	-999	-0.02	1.425	-999	3.01	0.36	4.15	2.86	8.83	2.09	7.82	1.81	2.08	-999	-999	-999
8/13/2014 1:00	1.8	284	12.6	49	0	0	-999	-0.01	1.365	-999	-999	-999	-999	-999	-999	-999	-999	-999	-999	-999	-999	-999
8/13/2014 2:00	1.4	310	11.7	52	0	0	0.221969363	0.001	0.884	-999	2.77	0.389	5.21	2.97	7.91	1.56	7.31	1.71	2.38	-999	-999	-999
8/13/2014 3:00	1.4	299	13.3	46	0	0	0.209869228	-0.018	0.93	-999	2.96	0.319	4.87	2.83	7.97	1.33	7	1.75	2.11	-999	-999	-999
8/13/2014 4:00	1.7	299	12.9	48	0	0	0.19910043	-999	-999	-999	2.9	0.217	4.57	2.48	7.29	1.3	6.7	1.59	2.07	-999	-999	-999
8/13/2014 5:00	1.7	291	12.8	48	0	0	0.181614236	0.011	0.756	-999	2.89	0.393	5.29	2.61	7.88	2.01	6.17	1.64	2.17	-999	-999	-999
8/13/2014 6:00	0.7	304	11.9	56	0	18	0.164188773	0.102	1.311	-999	2.69	0.296	4.52	2.17	7.61	1.3	5.84	1.37	1.91	-999	-999	-999
8/13/2014 7:00	1.2	289	13.6	56	0	52	0.156508987	0.149	1.62	-999	2.54	0.235	4.61	2.52	7.42	1.02	5.78	1.34	1.81	-999	-999	-999
8/13/2014 8:00	0.9	315	15.2	54	0	155	0.183415127	0.44	3.472	-999	2.33	0.276	4.45	2.24	7.38	1.56	6.08	1.4	1.91	-999	-999	-999
8/13/2014 9:00	1.2	356	17.3	44	0	304	0.200012186	0.249	2.424	-999	2.61	0.319	6.14	2.85	8.77	2.13	7.86	2.03	2.69	-999	-999	-999
8/13/2014 10:00	1.2	37	19	36	0	631	0.172320675	0.15	1.787	-999	2.87	0.254	6.29	3.41	10.25	2.27	8.74	2.12	2.87	1519.2	102.1	228.2
8/13/2014 11:00	1.6	140	20	35	0	586	0.489496163	0.085	1.418	386.3	-999	-999	-999	-999	-999	-999	-999	-999	-999	-999	-999	-999
8/13/2014 12:00	1.7	131	19.9	36	0	421	0.906183777	0.064	1.329	343.25	2.51	0.341	6.55	2.72	7.94	1.7	8	1.82	2.18	1257.4	64.6	135.2
8/13/2014 13:00	2	144	20.1	38	0	429	0.867416932	0.048	1.61	368.5	2.74	0.194	6	2.71	8.22	1.78	7.8	1.88	2.57	1245.4	64.1	132.6
8/13/2014 14:00	2.7	144	19.7	41	0.2	342	0.803840857	0.097	1.853	370.6363636	2.72	0.3	6.29	3.72	11.79	2.69	11.09	2.91	3.77	1672.2	113.9	275.6
8/13/2014 15:00	0.7	302	17	61	0.5	375	0.762717371	0.305	2.436	421.5	2.62	0.262	6.17	3.45	10.43	2.41	9.57	2.53	2.93	1511.6	96.6	226.3
8/13/2014 16:00	0.8	251	18.4	50	0	194	0.745502381	0.078	1.986	461.25	2.95	0.189	5.59	3.81	12.83	2.7	13.71	3.61	4.42	1809.5	222.9	349
8/13/2014 17:00	1.2	207	17.9	49	0	133	0.695676929	0.017	1.704	441.9166667	3.61	0.264	6.06	3.8	12.8	2.54	14.45	3.53	4.35	1646.5	114.7	263.5
8/13/2014 18:00	0.1	28	17.4	54	0	57	0.657988755	0.019	1.588	344.4545455	2.99	0.226	6.46	2.9	9.71	2.06	9.1	2.24	2.97	1232	70.2	145.8
8/13/2014 19:00	0.7	316	16.1	58	0	10	0.674850683	0.028	2.342	248.9166667	2.94	0.224	6.15	3.16	10.41	2.36	9.18	2.64	3.34	-999	-999	-999
8/13/2014 20:00	0.6	252	14.8	61	0	0	0.680543654	0.041	2.192	250.9166667	2.8	0.328	5.05	2.83	9.2	1.67	8.59	2.08	2.76	-999	-999	-999
8/13/2014 21:00	0.8	181	15	59	0	0	0.651606571	0.014	1.844	288.8333333	4.25	0.267	4.74	3.18	10.83	1.97	10.43	2.93	3.96	-999	-999	-999
8/13/2014 22:00	0.8	279	14	62	0	0	0.597457813	0.026	1.676	175.1666667	3.28	0.502	5.3	2.9	9.53	1.54	7.34	1.99	2.67	-999	-999	-999
8/13/2014 23:00	0.7	276	13.1	71	0.1	0	0.540912151	0.011	1.091	129.0909091	2.55	0.559	5.38	2.71	8.84	1.65	6.72	1.49	1.78	-999	-999	-999
8/14/2014 0:00	1.1	323	13.8	66	0	0	-999	-0.002	1.16	16.58823529	2.96	0.241	5.06	2.56	8.9	1.74	7.31	1.44	1.54	-999	-999	-999
8/14/2014 1:00	0.9	304	13.4	64	0	0	-999	-0.003	0.955	15	2.71	0.313	4.28	2.92	9.96	1.74	7.51	1.33	1.59	-999	-999	-999
8/14/2014 2:00	1	288	13.1	64	0	0	0.345293877	0.013	0.8	10.45833333	2.62	0.318	5.27	2.62	8.91	1.61	7.86	1.36	1.79	-999	-999	-999
8/14/2014 3:00	1.1	343	13.9	61	0	0	0.315398513	0.007	0.914	12.5	2.16	0.322	4.88	2.86	9.83	2.02	8.81	1.53	1.78	-999	-999	-999
8/14/2014 4:00	0.6	270	13.4	62	0	0	0.289763555	0.004	0.614	12.5	2.17	0.449	4.06	2.75	9.74	1.98	9.09	1.7	2.11	-999	-999	-999
8/14/2014 5:00	0.7	317	12.4	67	0	0	0.268165532	0.021	0.703	8.916666667	1.51	0.518	3.92	2.45	10.76	2.22	9.88	1.7	2.13	-999	-999	-999
8/14/2014 6:00	0.6	299	12.6	66	0	11	0.245896441	0.746	2.512	8.875	-999	-999	-999	-999	-999	-999	-999	-999	-999	-999	-999	-999
8/14/2014 7:00	0.8	311	13.6	63	0	49	0.220716546	0.08	1.311	10.95454545	1.6	0.705	4.75	3.03	11.39	2.35	11.72	2.02	2.75	-999	-999	-999
8/14/2014 8:00	0.9	332	14.6	63	0	151	0.204670515	0.245	1.979	11.70833333	1.48	0.495	4.02	2.71	11.13	2.36	11.05	1.93	2.35	-999	-999	-999
8/14/2014 9:00	0.6	23	16.6	54	0	345	0.208729433	0.315	1.715	20.375	1.45	0.793	5.98	3.15	12.37	2.78	13.17	2.51	3.2	2273.4	121.8	284
8/14/2014 10:00	0.9	174	16.5	57	0	197	0.191983384	0.054	0.977	45.92857143	2.11	0.468	5.64	3.07	11.26	2.11	11.43	2.27	2.81	1831.4	99.2	237.3
8/14/2014 11:00	0.6	162	17.2	53	0	476	0.251249037	0.097	0.981	30.07142857	2	0.577	6.21	3.28	11.4	2.62	11.86	2.43	3.11	1895.1	96.8	231.6
8/14/2014 12:00	0.9	19	18.6	49	0	650	0.493836961	0.086	0.956	27	1.58	0.603	5.06	2.93	11.71	2.1	11.89	2.13	2.49	1952.1	88.8	209.5
8/14/2014 13:00	2	12	17.9	52	0	433	1.015392437	0.246	1.305	23.59090909	1.43	0.825	5.52	2.81	11.09	2.32	10.83	1.95	2.58	1793.1	90.5	206.6
8/14/2014 14:00	1.7	4	13.5	79	3.8	252	1.065262186	0.121	0.694	21.54166667	1.39	0.696	5.62	2.62	9.78	1.53	8.74	1.35	1.38	1490	72.5	146.4
8/14/2014 15:00	1	186	14.8	74	0	306	1.0203044	0.055	0.513	24.5	1.23	0.76	7.34	2.42	8.89	1.48	6.66	1.01	1.09	1225.6	44.5	97.5
8/14/2014 16:00	0.9	174	15.2	69	0	318	0.894400869	0.054	0.83	36.20833333	-999	-999	-999	-999	-999	-999	-999	-999	-999	-999	-999	-999
8/14/2014 17:00	0.8	12	17.1	59	0	499	0.772867571	0.064	0.692	27.90909091	2.3	0.592	6.28	3.155	12.2	2.31	12.515	2.315	2.6	1705.8	87.45	202.8
8/14/2014 18:00	1.6	332	17	55	0	225	0.701242265	0.055	0.521	22.91666667	1.4	0.632	5.85	2.83	10.46	1.88	9.68	1.42	1.42	1668.8	72	118.7
8/14/2014 19:00	1.8	339	15.4	57	0	14	0.693853958	0.049	0.447	20.04166667	1.35	0.579	7.48	2.4	10.14	1.95	9.39	1.42	1.46	1654.7	67.8	121.6
8/14/2014 20:00	1.8	336	14.6	57	0	0	0.66008495	0.023	0.41	22.04166667	1.28	-999	5.3	2.33	9.84	1.87	8.89	1.26	1.47	1506.1	61.3	110.2
8/14/2014 21:00	1.2	274	13	66	0	0	0.610625184	0.058	0.562	13.52	-999	-999	-999	-999	-999	-999	-999	-999	-999	-999	-999	-999
8/14/2014 22:00	1	303	13.6	59	0	0	0.530067231	0.026	0.385	12.31818182	1.57	0.434	4.78	2.12	8.64	1.65	7.49	1.09	1.3	1345.9	60.2	130.9
8/14/2014 23:00	1.7	333	14.8	47	0	0	0.468792986	0.006	0.415	15.83333333	1.33	0.405	4.75	1.99	7.83	1.32	7.24	1.01	1.11	-999	-999	-999
8/15/2014 0:00	1.4	318	14.4	48	0	0	-999	0.009	0.466	173.4166667	1.43	0.465	5.1	2.41	9.12	1.83	7.85	1.13	1.33	1847.3	113.2	160.7
8/15/2014 1:00	1.5	328	14.5	49	0	0	-999	-0.001	0.473	170.1666667	1.35	0.615	4.87	2.32	9.15	1.88	7.71	1.16	1.09	1613.4	83.4	124.7
8/15/2014 2:00	1.3	312	13.9	53	0	0	0.29157201	0.006	0.512	142.1818182	-999	-999	-999	-999	-999	-999	-999	-999	-999	-999	-999	-999
8/15/2014 3:00	1.8	343	13.9	54	0	0	0.250954324	0.041	0.596	150.5833333	1.4	0.697	5.09	2.46	10.59	2.37	8.91	1.45	1.64	-999	-999	-999
8/15/2014 4:00	2	6	13.1	60	0	0	0.231008971	-999	-999	147.4166667	1.22	0.62	5.48	2.66	10.49	1.93	9.28	1.62	1.75	1623	79.7	134.4
8/15/2014 5:00	1.8	331	13.1	55	0	0	0.212763447	0.038	0.694	124.4166667	1.38	0.679	4.78	2.34	9.47	1.97	8.21	1.52	1.55	-999	-999	-999
8/15/2014 6:00	2.3	344	13.4	56	0	11	0.183152139	0.085	0.746	144.3636364	1.37	0.786	5.68	2.62	9.89	1.97	8.29	1.3	1.47	1610.9	106.4	195
8/15/2014 7:00	1.9	333	14.5	52	0	122	0.155024107	-999	-999	156.8333333	1.37	0.735	5.85	2.84	8.94	1.75	7.33	1.39	1.47	1425	115.7	136
8/15/2014 8:00	2.2	332	16.4	43	0	280	0.138179959	0.269	1.467	164.25	-999	-999	-999	-999	-999	-999	-999	-999	-999	-999	-999	-999
8/15/2014 9:00	2.6	334	17.4	43	0	583	0.115583407	0.115	0.804	187.0833333	1.37	1.003	6.02	2.22	8.09	1.48	6.63	0.95	0.97	1336.2	82.1	210.7
8/15/2014 10:00	2.7	328	18	40	-999	738	0.10423414	0.505	1.95	203.4545455	2.05	-999	-999	-999	8.81	2.5	6.83	0.65	1.35	1063.8	47.8	79
8/15/2014 11:00	2.4	303	18.7	39	-999	852	0.304248989	0.202	0.966	184.1666667	2.15	-999	-999	-999	7.72	1.83	5.77	0.78	1.17	897.9	34.6	71
8/15/2014 12:00	2	285	19.5	36	-999	952	0.566972304	0.117	0.722	176.1666667	-999	-999	-999	-999	-999	-999	-999	-999	-999	-999	-999	-999
8/15/2014 13:00	2.1	272	18.6	36	0.1	256	0.761026617	0.104	0.715	166.5	2.43	-999	-999	-999	7.59	2.22	5.1	0.77	1.2	949.5	36.4	62.5
8/15/2014 14:00	1.9	262	14.1	60	0.3	79	0.741964115	0.147	1.091	145.6363636	-999	-999	-999	-999	-999	-999	-999	-999	-999	-999	-999	-999
8/15/2014 15:00	1.7	350	15.1	59	0.2	291	0.636244836	0.33	1.667	170.9166667	1.97	-999	-999	-999	6.11	1.79	4.27	0.61	1.28	-999	-999	-999
8/15/2014 16:00	0.3	249	14.8	64	0	156	0.532686283	0.072	0.574	145.6666667	1.45	-999	-999	-999	5.94	1.84	3.96	0.86	0.86	-999	-999	-999
8/15/2014 17:00	1.6	287	15.8	56	0.8	99	0.482298871	0.038	0.569	152.3333333	1.86	-999	-999	-999	6.55	1.62	4	0.63	1.01	-999	-999	-999
8/15/2014 18:00	1.9	316	12.2	65	0.3	44	0.421534904	0.023	0.334	147.8181818	1.14	0.629	5.74	1.78	5.28	0.79	3.45	0.96	1.11	-999	-999	-999
8/15/2014 19:00	2	323	13.7	54	0	16	0.351069858	0.024	0.634	128.8333333	1.28	0.696	5.93	1.97	5.93	1.46	4.88	1.04	1.19	-999	-999	-999
8/15/2014 20:00	2.2	326	14.7	44	0	0	0.278149674	0.047	0.495	143.1666667	1.3	0.779	6.03	2.07	5.92	1.1	4.7	0.95	1.2	1025.4	59.5	118.7
8/15/2014 21:00	2.1	324	14.4	42	0	0	0.230016965	0.026	0.397	129.9166667	1.34	0.818	5.93	1.92	5.48	1.3	5.22	0.98	1.02	1052.6	57.7	105.3
8/15/2014 22:00	2.3	314	14.5	42	0	0	0.161422222	0.014	0.363	147.5	1.29	0.617	6.21	2.05	6.42	1.33	5.61	1.09	1.4	1292.5	80	127.9
8/15/2014 23:00	1.2	309	14.3	42	0	0	0.124061168	-0.02	0.47	139.8181818	1.3	0.668	5.48	2.18	7.12	1.31	5.5	1.29	1.59	1391.5	89.3	133.9
8/16/2014 0:00	1.4	322	13.9	45	0	0	-999	0.012	0.58	15	-999	-999	-999	-999	-999	-999	-999	-999	-999	-999	-999	-999
8/16/2014 1:00	1.3	338	13.6	46	0	0	-999	0.007	0.572	14.66666667	1.47	0.823	5.58	2.34	7.35	1.44	6.14	1.55	1.98	-999	-999	-999
8/16/2014 2:00	1.4	332	12.9	49	0	0	0.16914415	0.029	0.532	13.66666667	1.43	0.773	5.66	2.24	7.48	1.8	5.76	1.29	1.64	-999	-999	-999
8/16/2014 3:00	1.5	322	14.2	45	0	0	0.159159428	0.048	0.482	13.81818182	1.45	0.711	5.57	2.36	8.35	1.84	7.86	1.76	2.48	1591.8	114.7	196
8/16/2014 4:00	1.5	310	13.4	48	0	0	0.142773798	0.025	0.491	13.33333333	1.3	0.613	5.6	2.21	7.6	1.48	6.76	1.64	2.34	-999	-999	-999
8/16/2014 5:00	1.7	320	13.1	48	0	0	0.152113458	0.004	0.484	12.83333333	1.53	0.792	5.34	2.26	7.8	1.5	7.29	1.8	2.24	1526.1	113.5	200.7
8/16/2014 6:00	1.2	308	12.8	46	0	9	0.142834354	-0.007	0.857	11.83333333	1.6	0.802	5.75	2.18	6.74	1.69	5.42	1.23	1.62	1229.5	90.3	159.3
8/16/2014 7:00	1.1	328	11.9	52	0	78	0.117931683	0.107	1.362	10.54545455	1.555	0.7385	4.865	2.02	5.97	1.625	4.755	0.995	1.315	-999	-999	-999
8/16/2014 8:00	1	15	16	41	0	385	0.097067008	0.35	2.092	18.58333333	1.52	0.727	5.74	1.93	5.49	0.75	4.01	0.91	1.09	861.2	50.7	89.2
8/16/2014 9:00	1.8	305	17.7	34	0	581	0.0798174	0.09	1.044	24.83333333	-999	-999	-999	-999	-999	-999	-999	-999	-999	-999	-999	-999
8/16/2014 10:00	2.9	297	18.5	29	0	741	0.075433782	0.04	0.629	23	1.52	0.754	5.52	1.88	4.48	0.63	2.65	0.7	0.46	660.6	27.8	55.3
8/16/2014 11:00	2.2	297	19.2	28	0	864	0.179803342	0.053	0.547	18.27272727	1.41	0.795	5.16	1.68	4.01	0.66	2.56	0.51	0.46	663.8	26.5	47.4
8/16/2014 12:00	2	276	19.8	25	0	949	0.450214496	0.048	0.579	19.83333333	1.48	0.774	5.48	1.8	4.23	0.63	2.29	0.57	0.45	656.9	20.6	39.7
8/16/2014 13:00	2.2	265	20.5	25	0	939	0.623317556	0.063	0.529	22.75	1.43	0.725	5.86	1.73	4.35	0.63	2.43	0.54	0.53	670.5	25.6	47.9
8/16/2014 14:00	1.4	275	20.6	24	0	791	0.700573719	-999	-999	22.16666667	1.5	0.704	5.84	1.87	4.85	1.02	2.56	0.48	0.41	673	25.3	47.1
8/16/2014 15:00	1.7	249	21.4	22	0	824	0.670978503	-999	-999	21.45454545	1.44	0.733	5.74	1.58	4.18	0.76	2.55	0.59	0.58	680.6	24.8	43.6
8/16/2014 16:00	2	271	21.7	19	0	652	0.626728992	-999	-999	20.33333333	1.38	0.548	5.72	1.51	3.74	0.84	1.69	0.35	0.27	571.1	17.9	39.4
8/16/2014 17:00	1.6	323	21.7	17	0	399	0.604425287	-999	-999	19.33333333	1.37	0.653	6.14	1.81	3.63	0.87	1.49	0.29	0.26	594.6	16.8	39
8/16/2014 18:00	1.7	300	20.7	21	0	203	0.561369705	0.065	0.618	23.75	1.48	0.578	5.69	1.84	3.87	0.92	2.56	0.45	0.43	652.9	28.1	62.1
8/16/2014 19:00	1.5	287	17.4	29	0	11	0.45730983	0.035	0.748	29.54545455	-999	-999	-999	-999	-999	-999	-999	-999	-999	-999	-999	-999
8/16/2014 20:00	1	297	15.1	35	0	0	0.399394937	0.029	0.781	27.25	1.94	0.781	5.38	1.79	5.44	0.96	4.17	0.95	1.34	740.4	45	100.8
8/16/2014 21:00	0.5	313	13.9	38	0	0	0.327374801	0.026	0.767	24.25	1.78	0.646	6.06	2.1	6.04	1.39	4.34	1	1.26	-999	-999	-999
8/16/2014 22:00	1	322	13.5	39	0	0	0.265829166	0.017	0.638	16.83333333	1.37	0.769	5.61	1.79	5.46	0.79	3.7	0.67	0.93	-999	-999	-999
8/16/2014 23:00	0.5	339	11.8	45	0	0	0.22704137	0.021	0.623	11.08333333	1.4	0.718	5.37	1.75	5.31	0.92	3.62	0.65	0.98	-999	-999	-999
8/17/2014 0:00	1.2	349	12.7	41	0	0	-999	0.012	0.75	90	1.33	1.008	5.43	1.62	4.76	0.87	3.14	0.73	0.68	-999	-999	-999
8/17/2014 1:00	1.3	346	12.8	39	0	0	-999	0.022	0.527	74.5	1.28	0.729	5.3	1.7	5.18	1.17	3.07	0.7	0.96	-999	-999	-999
8/17/2014 2:00	1.5	319	13	38	0	0	0.147081164	0	0.306	70.75	1.26	0.8	4.39	1.57	4.49	0.91	3.52	0.6	0.75	-999	-999	-999
8/17/2014 3:00	1.7	308	13.5	37	0	0	0.120070368	0.019	0.468	102.25	1.53	0.693	5.13	1.8	5.22	1.18	4	0.93	1.27	-999	-999	-999
8/17/2014 4:00	1.5	299	12.4	39	0	0	0.093976441	-999	-999	94.54545455	1.49	0.724	5.76	2.14	6.06	1.48	5.01	1.21	1.56	-999	-999	-999
8/17/2014 5:00	1	285	10.7	44	0	0	0.096757811	0.005	0.533	84.09090909	-999	-999	-999	-999	-999	-999	-999	-999	-999	-999	-999	-999
8/17/2014 6:00	1.1	280	10.5	45	0	8	0.074201689	0.015	0.441	89.91666667	1.37	0.757	5.64	2.12	5.53	2.47	4.29	1.19	1.58	1220.7	88	139.9
8/17/2014 7:00	0.9	315	10.5	51	0	116	0.056578588	0.242	1.216	83.41666667	1.34	0.577	6.23	1.85	5.54	1.14	4.47	1.14	1.43	-999	-999	-999
8/17/2014 8:00	0.7	147	16.9	35	0	401	0.043023641	0.12	0.782	129	1.31	0.673	6.04	1.85	5	0.8	4.09	0.95	1.19	-999	-999	-999
8/17/2014 9:00	1.2	4	19.4	27	0	519	0.028422498	-999	-999	156.3333333	1.36	0.673	5.82	1.92	5.89	1.01	4.66	1.2	1.77	1286.6	94.7	178.1
8/17/2014 10:00	2	21	20	26	0	746	0.007100381	-999	-999	142.5833333	1.33	0.735	6.41	1.91	5.1	1.07	4.33	1.05	1.3	1238.7	84.3	159.6
8/17/2014 11:00	1.2	299	20.7	25	0	804	0.022193682	-999	-999	158	1.32	0.623	5.56	1.55	4.4	0.98	4.08	0.72	0.93	975.7	58.7	105.6
8/17/2014 12:00	2.3	342	20.6	27	0	589	0.164100051	-999	-999	161.8181818	1.28	0.714	5.41	1.68	4.59	0.81	2.98	0.79	0.98	936	51.5	88.4
8/17/2014 13:00	1.8	281	21.4	24	0	792	0.302441228	0.048	0.53	182.1666667	1.26	0.638	5.19	1.62	4.71	0.85	3.48	0.83	0.88	891.3	51.5	80.2
8/17/2014 14:00	2.2	321	22.2	20	0	898	0.369059637	-999	-999	149.8333333	1.33	0.551	5.85	1.69	3.75	0.66	2.25	0.6	0.51	712.8	29.9	61.4
8/17/2014 15:00	1.8	302	22.6	17	0	788	0.465305217	-999	-999	131.0833333	-999	-999	-999	-999	-999	-999	-999	-999	-999	-999	-999	-999
8/17/2014 16:00	2	265	22.7	15	0	627	0.560639894	-999	-999	107.2727273	1.175	0.418	4.595	1.285	2.5	0.735	0.84	0.35	0.38	484.55	11.05	23.9
8/17/2014 17:00	1.2	235	21.8	21	0	381	0.502988018	-999	-999	152.75	1.92	0.464	6.23	3.66	14.03	2.83	20.5	6.06	7.96	3345.2	410.9	1038.5
8/17/2014 18:00	1.4	176	20	29	0	196	0.415713824	-999	-999	249.9166667	2.04	0.436	6.27	3.15	12.62	2.08	19.23	5.28	7.13	2898.4	355.4	897.4
8/17/2014 19:00	1	240	16	38	0	11	0.347928347	0.059	1.053	194	2.42	0.39	5.27	2.51	9.87	2.08	14.64	3.93	5.71	-999	-999	-999
8/17/2014 20:00	1	271	12.6	39	0	0	0.288923195	0.01	0.6	131.25	1.7	0.441	4.3	1.06	3.26	0.41	2.8	0.55	0.87	-999	-999	-999
8/17/2014 21:00	0.8	314	12.8	38	0	0	0.236845334	0.021	0.732	137.9090909	2.09	0.55	4.31	1.36	5.34	1.24	5.93	1.27	1.78	-999	-999	-999
8/17/2014 22:00	0.8	326	11.7	40	0	0	0.196981613	0.031	0.632	143.4166667	1.3	0.588	4.22	1.42	3.88	0.78	2.55	0.52	0.77	-999	-999	-999
8/17/2014 23:00	0.8	336	12.9	34	0	0	0.149548344	0.003	0.546	180.8333333	1.75	0.37	5.63	1.62	3.63	0.91	2.28	0.6	0.68	-999	-999	-999
8/18/2014 0:00	0.9	305	13.3	32	0	0	-999	0.006	0.517	197.6666667	-999	-999	-999	-999	-999	-999	-999	-999	-999	-999	-999	-999
8/18/2014 1:00	1.1	288	12.5	34	0	0	-999	-0.001	0.4	148.9090909	1.38	0.454	5.82	1.79	3.67	1.96	2	0.47	0.44	631.8	24.7	38.5
8/18/2014 2:00	1.1	317	11.7	37	0	0	0.109552229	-0.01	0.298	108.0833333	1.22	0.445	4.34	1.42	3.22	0.71	1.99	0.4	0.61	-999	-999	-999
8/18/2014 3:00	1.4	321	12.2	35	0	0	0.069758927	0.025	0.375	108.0833333	1.23	0.371	5.08	1.54	3.95	1.19	1.87	0.35	0.62	-999	-999	-999
8/18/2014 4:00	1.6	291	12	36	0	0	0.056659743	0.011	0.47	103.4166667	1.33	0.426	4.94	1.61	3.67	0.92	3.23	0.45	0.9	-999	-999	-999
8/18/2014 5:00	1.6	310	11.4	38	0	0	0.060371918	-0.005	0.702	124.0909091	1.31	0.54	5.26	1.65	3.85	0.81	2.14	0.57	0.53	-999	-999	-999
8/18/2014 6:00	1.2	307	10.6	43	0	16	0.04448706	0.023	0.558	124.3333333	1.28	0.515	5.8	1.76	3.75	1.41	2.87	0.53	0.82	-999	-999	-999
8/18/2014 7:00	1	332	11	48	0	112	0.031004014	0.139	1.232	120	1.33	0.451	5.39	1.65	4.16	0.93	2.81	0.52	0.86	-999	-999	-999
8/18/2014 8:00	0.4	7	17	35	0	400	0.017941537	0.212	1.373	162.4166667	1.22	0.522	5.31	1.49	4.03	0.8	2.5	0.44	0.44	-999	-999	-999
8/18/2014 9:00	1	287	19.8	26	0	562	0.011978258	0.448	2.025	181.4545455	1.33	0.534	6.25	1.48	3.76	1.69	2.74	0.92	1.19	804.1	44.3	86.3
8/18/2014 10:00	2.8	266	20	22	0	527	0.004549797	0.06	0.599	172.6666667	-999	-999	-999	-999	-999	-999	-999	-999	-999	-999	-999	-999
8/18/2014 11:00	1.9	302	20.6	23	0	745	0.045098115	-999	-999	189.6666667	1.26	0.565	6.08	1.66	4.56	1.05	3.38	0.87	1.12	1099.9	60.8	120.1
8/18/2014 12:00	2.4	230	18	33	0.1	534	0.130982885	0.018	0.528	203.5833333	1.21	0.57	5.33	1.71	4.28	0.68	3.28	0.79	1.16	1084.8	64.4	131.2
8/18/2014 13:00	2	247	19.9	26	0	778	0.218450216	0.038	0.636	214.8181818	1.31	0.566	7.35	1.77	4.62	0.98	3.96	0.88	0.9	998	57.4	100.4
8/18/2014 14:00	1.6	278	21.2	22	0	857	0.230478614	0.059	0.595	172.0833333	1.26	0.49	5.69	1.49	4.44	0.62	3.32	0.71	0.81	901.1	47.9	90.3
8/18/2014 15:00	3.1	266	21	21	0	449	0.331692678	0.093	0.604	148	1.37	0.524	6.22	1.64	3.93	0.94	2.94	0.73	0.97	873.9	47.5	97
8/18/2014 16:00	1.8	79	20.1	31	0	398	0.375879888	0.135	2.093	403.5833333	2.155	0.407	6.385	4.12	16.165	3.47	25.72	7.675	10.995	4605	537.85	1391.45
8/18/2014 17:00	1.7	89	19	36	0	218	0.346840826	0.043	2.7	572.1666667	4.05	0.365	6.57	6.66	31.83	6.44	53.16	15.39	21.46	8392.3	1006.6	2619.4
8/18/2014 18:00	1.3	200	17.8	42	0	122	0.312951655	0.089	4.09	834.9090909	5.63	0.237	8.02	8.41	40.37	8.82	67.46	19.9	29.18	9799.8	1158	2977.7
8/18/2014 19:00	0.8	245	14.4	53	0	13	0.285905718	0.05	3.939	681.9166667	-999	-999	-999	-999	-999	-999	-999	-999	-999	-999	-999	-999
8/18/2014 20:00	0.7	291	13.2	56	0	0	0.260338114	0.007	3.346	549.5833333	6.16	0.323	7.63	7.77	35.93	6.85	57.35	17.66	26.24	-999	-999	-999
8/18/2014 21:00	1.2	306	13.1	54	0	0	0.237591994	-0.006	3.276	509.8333333	5.72	0.234	7.12	7.35	30.01	6.27	51.73	16.16	25.57	7041.8	838.2	2126.2
8/18/2014 22:00	0.8	293	11.6	57	0	0	0.204611046	0.015	3.397	540	6.57	0.354	8.09	6.71	29.87	10.14	46.51	14.33	21.43	-999	-999	-999
8/18/2014 23:00	0.7	271	9.4	66	0	0	0.196528176	-0.012	2.892	318.0833333	5.83	0.388	5.57	4.56	21.92	5.44	31.08	9.9	15	-999	-999	-999
8/19/2014 0:00	0.7	292	8.7	72	0	0	-999	0.004	2.474	149.9166667	4.31	0.448	5.05	3.1	13.73	2.09	17.92	5.2	8.37	-999	-999	-999
8/19/2014 1:00	0.9	301	8.4	73	0	0	-999	-0.013	2.287	128.5833333	4.3	0.34	5.22	2.98	11.69	2.14	14.36	3.85	5.98	-999	-999	-999
8/19/2014 2:00	1.2	307	9	70	0	0	0.135921637	0.013	2.374	135	4.42	0.628	6.05	3.02	11.99	3.47	15.62	4.37	6.24	-999	-999	-999
8/19/2014 3:00	1.7	286	9.9	60	0	0	0.111488945	0.022	1.999	145.0833333	3.36	0.453	4.66	2.85	10.93	2.22	14.46	4.48	6.48	2641.1	295.5	733.2
8/19/2014 4:00	1.5	301	9.6	56	0	0	0.108857403	-999	-999	109.75	2.34	0.84	4.64	2.27	8.4	2.84	11.05	2.98	4.35	-999	-999	-999
8/19/2014 5:00	1.2	301	10.6	52	0	0	0.07699164	0.013	0.791	70.66666667	-999	-999	-999	-999	-999	-999	-999	-999	-999	-999	-999	-999
8/19/2014 6:00	0.5	283	11	53	0	18	0.057271795	0	0.702	63.90909091	1.76	0.6	5.04	1.67	5.25	1.01	4.54	1.19	1.87	-999	-999	-999
8/19/2014 7:00	0.8	225	14.4	42	0	66	0.039964639	-999	-999	78.58333333	1.46	0.735	4.25	1.56	4.25	0.76	3.64	0.72	1.03	-999	-999	-999
8/19/2014 8:00	2.9	251	17.4	33	0	304	0.014889588	0.055	0.474	73.66666667	1.26	0.708	6.7	1.73	3.94	0.88	2.11	0.4	0.4	941.6	53.1	77.4
8/19/2014 9:00	2	358	18.1	33	0	449	-0.000923112	0.095	0.721	78.5	1.22	0.696	4.94	1.4	3.08	0.71	2	0.39	0.46	920.2	51.2	71.7
8/19/2014 10:00	0.9	32	-999	28	0	608	-0.023023741	0.048	0.582	97.72727273	1.23	0.651	4.69	1.38	4	0.88	2.25	0.41	0.4	859	43.2	62
8/19/2014 11:00	-999	-999	-999	-999	0	585	-0.002808064	0.038	0.584	100.1	1.22	0.641	5.46	1.57	3.72	0.98	2.26	0.48	0.5	871.7	57.6	102
8/19/2014 12:00	2.1	128	-999	-999	0	502	0.171084082	0.026	0.495	100.4545455	1.17	0.643	6.13	1.56	3.58	0.81	1.87	0.45	0.38	734.6	29.3	45.2
8/19/2014 13:00	2.2	203	-999	-999	0	491	0.302652318	0.071	0.499	97.5	1.24	0.672	6.54	1.61	3.74	0.97	2.1	0.51	0.45	754.5	27.2	50
8/19/2014 14:00	2.9	245	17.3	41	0	440	0.313524779	0.036	0.476	116.1666667	1.33	0.514	5.87	1.61	3.75	0.87	2.48	0.5	0.44	837.5	39.4	65.3
8/19/2014 15:00	2.1	149	17.1	41	0	612	0.281458853	0.036	0.402	118.75	-999	-999	-999	-999	-999	-999	-999	-999	-999	-999	-999	-999
8/19/2014 16:00	2.6	159	17.2	43	0	317	0.275913784	0.062	0.653	117.9090909	1.07	0.49	5.92	1.57	3.63	0.63	2.15	0.51	0.4	676.6	25.4	41.1
8/19/2014 17:00	1.9	148	16.5	45	0	140	0.267525118	0.033	0.7	150.6666667	1.45	0.522	4.84	1.36	3.57	0.66	2.26	0.53	0.58	700.7	27.5	53.1
8/19/2014 18:00	2.5	206	15	50	0	29	0.259032419	-999	-999	145.3333333	1.9	0.428	5.45	1.51	4.22	1.27	3.08	0.8	0.85	714	33	58.8
8/19/2014 19:00	0.9	12	14.6	51	0	12	0.232111875	0.014	0.657	127	1.13	0.404	4.75	1.67	4.16	0.88	2.89	0.45	0.3	742.1	25.1	42.2
8/19/2014 20:00	0.7	333	14.2	54	0	0	0.194040138	0.02	0.468	130.2727273	1.34	0.467	6.14	1.74	4.16	0.94	2.91	0.54	0.46	817.2	36.9	62.3
8/19/2014 21:00	0.5	254	12.1	63	0	0	0.177943643	0.002	0.534	105.8333333	1.36	0.4955	5.64	1.705	4.58	0.84	2.81	0.6	0.53	-999	-999	-999
8/19/2014 22:00	0.9	294	11.5	64	0	0	0.159479493	0.016	0.497	83.75	1.41	0.478	5.26	1.79	4.76	0.79	3.45	0.49	0.56	-999	-999	-999
8/19/2014 23:00	0.8	310	11.6	65	0	0	0.140260621	0.019	0.355	86.08333333	1.27	0.537	4.48	1.41	4.2	0.79	3.02	0.58	0.67	-999	-999	-999
8/20/2014 0:00	1	298	11.4	70	0	0	-999	0.013	0.427	117.7	-999	-999	-999	-999	-999	-999	-999	-999	-999	-999	-999	-999
8/20/2014 1:00	1	315	11.2	68	0	0	-999	0.034	0.508	96.5	1.41	0.603	5.07	1.73	4.94	1.04	2.82	0.71	1	-999	-999	-999
8/20/2014 2:00	0.7	277	10.5	71	0	0	0.128603439	0.03	0.394	95.25	1.51	0.65	4.75	1.56	4.66	0.85	3.08	0.52	0.76	-999	-999	-999
8/20/2014 3:00	0.5	298	8.3	79	0	0	0.106840743	-0.005	0.394	83.25	1.48	0.531	4.83	1.69	5.13	1.06	3.71	0.65	0.79	-999	-999	-999
8/20/2014 4:00	0.7	326	9.2	74	0	0	0.105919183	-0.019	0.437	99.25	1.48	0.589	5.34	1.93	5.84	1.18	4.21	0.88	1.22	-999	-999	-999
8/20/2014 5:00	1	355	11	67	0	0	0.086991562	0.005	0.642	117.0909091	1.5	0.607	4.93	1.77	5.44	0.85	4.49	0.87	1.08	-999	-999	-999
8/20/2014 6:00	1.3	12	11.8	67	0	17	0.060890904	0.022	0.535	139.1666667	1.3	0.499	4.8	1.74	5.81	1.31	5.22	0.82	0.97	1035.6	48.4	83.9
8/20/2014 7:00	0.1	195	12.4	68	0	135	0.054908447	0.077	0.964	108.9166667	1.22	0.734	5.76	1.96	6.36	1.23	4.77	0.84	0.92	-999	-999	-999
8/20/2014 8:00	1.5	53	15.7	54	0	368	0.056047098	0.127	0.652	117.8333333	1.195	1.416	5.825	2.03	5.565	1.11	3.605	0.48	0.36	800.05	30.9	52.75
8/20/2014 9:00	2.6	62	16.6	50	0	561	0.030756705	0.085	0.441	117.3636364	-999	-999	-999	-999	-999	-999	-999	-999	-999	-999	-999	-999
8/20/2014 10:00	2.1	26	16.2	49	0	316	0.024349191	0.062	0.446	109.9166667	1.2	1.294	6.8	2.01	5.22	0.98	2.73	0.44	0.3	731.7	41.3	87.7
8/20/2014 11:00	0.9	105	17.1	44	0	484	0.035008709	0.049	0.374	127.8333333	1.16	1.162	6.08	1.8	4.65	0.88	3.02	0.51	0.36	714.3	21.7	42.4
8/20/2014 12:00	1.6	304	16.8	44	0	439	0.083749681	0.077	0.46	133.0833333	-999	-999	-999	-999	-999	-999	-999	-999	-999	-999	-999	-999
8/20/2014 13:00	1.4	22	16.9	44	0	323	0.158617157	0.063	0.396	131.0909091	1.17	1.483	6.7	1.925	4.74	1.055	2.62	0.545	0.785	717.4	27.7	45.2
8/20/2014 14:00	0.9	325	18	40	0	606	0.218302484	0.075	0.401	129.0833333	1.1	1.044	6.53	1.62	4.12	0.68	2.43	0.45	0.49	708.6	118.4	316.3
8/20/2014 15:00	1.6	304	19.7	33	0	757	0.259940258	0.061	0.377	128.75	1.08	0.953	6.13	1.6	4.06	0.91	2.31	0.5	0.53	821.8	32	40.8
8/20/2014 16:00	1.1	257	19.8	32	0	685	0.495260586	0.052	0.426	135.9166667	1.21	1.054	5.73	1.53	4.19	0.91	2.91	0.49	0.48	872.3	37.3	46.6
8/20/2014 17:00	0.4	85	18.9	33	0	342	0.58464701	0.049	0.365	121.8181818	1.2	1.019	6.24	1.71	4.17	0.75	2.5	0.54	0.35	901.2	41.1	49.4
8/20/2014 18:00	1.4	278	18	34	0	183	0.493693236	0.019	0.262	125.0833333	1.13	1.009	6.72	1.73	4.26	0.92	2.52	0.45	0.42	903.5	42.1	52.6
8/20/2014 19:00	0.3	323	16.1	41	0	33	0.412726222	0.019	0.375	139.8333333	1.24	0.919	5.83	1.54	4.56	0.8	2.67	0.66	0.65	1074.5	61.4	71.1
8/20/2014 20:00	2	27	13.4	56	0	0	0.335763576	0.056	0.367	133.4166667	1.22	0.865	5.86	1.89	5.24	0.72	2.78	0.47	0.44	1164	53.6	81.2
8/20/2014 21:00	0.8	331	12	55	0	0	0.281786495	0.038	0.392	120.2727273	-999	-999	-999	-999	-999	-999	-999	-999	-999	-999	-999	-999
8/20/2014 22:00	1.1	293	10.1	61	0	0	0.244131326	0.008	0.452	110	1.33	0.86	5.84	1.7	4.65	0.63	2.51	0.64	0.67	-999	-999	-999
8/20/2014 23:00	0.8	341	11.1	59	0	0	0.192660078	0.007	0.358	117.25	1.74	0.898	6.24	1.69	5.03	1	3.67	0.89	1.06	-999	-999	-999
8/21/2014 0:00	0.9	348	12	57	0	0	-999	0.032	0.33	144.75	1.4	0.843	5.29	1.56	4.22	0.66	2.74	0.69	0.73	1081.1	70.6	83.4
8/21/2014 1:00	1.4	3	11.1	63	0	0	-999	0.003	0.308	137.25	1.22	0.737	6.12	1.62	4.6	1.05	2.72	0.56	0.52	1101.2	67.3	79
8/21/2014 2:00	1.5	320	11.9	53	0	0	0.122487309	-0.019	0.246	128.1818182	1.26	0.813	6.24	1.76	4.26	1.02	2.77	0.47	0.53	-999	-999	-999
8/21/2014 3:00	2.2	325	12.9	48	0	0	0.090323157	-0.043	0.181	125.0833333	1.31	0.823	6.275	1.655	3.705	0.885	1.985	0.37	0.235	689.9	23.8	37.2
8/21/2014 4:00	2.4	347	11.9	53	0	0	0.065550068	-999	-999	115.9166667	1.46	0.721	5.59	1.66	3.92	0.88	2.26	0.27	0.16	-999	-999	-999
8/21/2014 5:00	2.3	318	12.2	53	0	0	0.049275206	0.015	0.219	130	1.35	0.615	5.57	1.6	3.98	0.74	2.27	0.36	0.24	840.2	29.9	43.5
8/21/2014 6:00	1.8	290	11.8	55	0	25	0.034263647	0.005	0.363	117.9090909	-999	-999	-999	-999	-999	-999	-999	-999	-999	-999	-999	-999
8/21/2014 7:00	1.2	40	11.6	61	0	153	0.02000235	0.049	0.543	110.5833333	1.22	0.78	5.41	1.69	4.48	0.81	2.23	0.8	0.52	867.2	42.7	62.2
8/21/2014 8:00	1.6	80	14.3	52	0	429	0.007449975	0.069	0.454	125.8333333	1.3	0.816	6.08	1.69	3.94	0.85	2.48	0.43	0.3	845	36.1	52.5
8/21/2014 9:00	1.7	127	15.2	48	0	561	-0.005192209	0.056	0.45	137.75	1.26	0.746	6.08	1.8	3.92	0.88	2.16	0.57	0.43	820.1	34.8	63
8/21/2014 10:00	2.4	61	16.6	42	0	617	-0.015214136	0.116	0.543	147	1.29	0.785	5.59	1.71	4	0.79	2.24	0.37	0.26	662.3	18.9	33.3
8/21/2014 11:00	1	48	17.4	39	0	688	-0.025316806	0.065	0.495	144	1.29	0.674	5.94	1.57	3.87	0.55	2.25	0.48	0.27	657.4	22.8	37.2
8/21/2014 12:00	2.5	286	17.7	36	0	598	-0.029953628	0.081	0.478	160.8333333	1.22	0.765	4.68	1.66	3.78	0.75	1.49	0.31	0.12	664.6	18.1	27.8
8/21/2014 13:00	2.7	283	18.3	33	0	731	-0.018097464	0.013	0.333	145.5833333	1.15	0.619	6.23	1.35	3.3	0.87	1.44	0.25	0.17	577.9	14	24.4
8/21/2014 14:00	0.5	195	18.2	33	0	520	0.014941963	0.02	0.329	156.4545455	1.19	0.643	6.44	1.76	3.56	0.58	1.35	0.41	0.17	612.2	12.3	25.1
8/21/2014 15:00	0.5	34	19.8	29	0	796	0.062866629	0.072	0.492	162	1.1	0.613	5.25	1.3	3.18	0.65	1.68	0.19	0.27	570	19.6	37.7
8/21/2014 16:00	2.6	141	18.8	39	0	601	0.121235453	0.066	1.536	272.0833333	-999	-999	-999	-999	-999	-999	-999	-999	-999	-999	-999	-999
8/21/2014 17:00	2.5	141	16.3	49	0	114	0.184169385	0.037	2.161	491.5833333	2.72	0.598	6.55	4.54	18.15	4.18	28.36	7	8.18	4185.3	459.5	1184.8
8/21/2014 18:00	1.5	148	14.8	55	0	67	0.191950619	0.068	3.18	688.8181818	7.1	0.785	8.8	3.91	11.95	2.75	11.13	2.93	2.27	1302.3	117.7	248.8
8/21/2014 19:00	0.7	319	14.1	54	0	16	0.173496629	0.036	1.846	460.0833333	4.11	0.656	7.49	2.76	7.45	1.43	6.64	1.81	1.76	882.2	59.2	120.8
8/21/2014 20:00	1.4	1	12.6	65	0	0	0.145150359	0.033	2.587	540.6666667	5.44	0.54	7.69	3.65	13.11	2.69	18.48	4.09	4.04	2524.7	276.8	686.6
8/21/2014 21:00	0.6	295	12.7	60	0	0	0.132600843	0.033	2.166	471.8333333	4.77	0.416	7.22	3.51	13.06	2.66	19.32	4.56	5.13	2607.9	298.6	727.8
8/21/2014 22:00	0.2	319	12.2	58	0	0	0.114289412	0.028	1.521	329.75	3.01	0.506	5.49	2.23	7.57	1.49	7.92	2.05	2.31	1272.3	109.8	252.1
8/21/2014 23:00	0.4	272	11.1	63	0	0	0.083679044	0.01	1.318	243.0909091	3.17	0.517	6.29	2.265	7.15	1.57	6.65	1.93	2.43	-999	-999	-999
8/22/2014 0:00	0.9	318	11.4	62	0	0	-999	-0.002	1.313	28.08333333	3.32	0.648	6.47	2.86	9.82	2.48	12.95	3.46	4.71	-999	-999	-999
8/22/2014 1:00	1.1	284	11.3	62	0	0	-999	0.031	1.258	31.66666667	-999	-999	-999	-999	-999	-999	-999	-999	-999	-999	-999	-999
8/22/2014 2:00	0.4	283	9	67	0	0	0.101562891	0.014	0.753	16.66666667	1.97	0.504	4.77	2.01	5.53	2.08	4.38	1.55	1.92	-999	-999	-999
8/22/2014 3:00	0.5	304	8.3	69	0	0	0.060013937	0.019	0.746	15.18181818	1.91	0.633	7.1	1.92	5.59	1.65	4.44	0.96	1.36	-999	-999	-999
8/22/2014 4:00	1.1	302	9.5	69	0	0	0.053927564	0.006	0.807	16.16666667	1.96	0.783	4.81	1.89	5.07	1.48	4.44	0.94	1.39	-999	-999	-999
8/22/2014 5:00	0.7	333	9.4	70	0	0	0.047881957	0.01	0.712	17.66666667	1.76	0.633	5.82	1.59	4.86	0.8	4.77	1.4	1.63	-999	-999	-999
8/22/2014 6:00	0.9	319	9.4	74	0	7	0.038903176	0.078	1.064	18.91666667	2.16	0.815	5.29	1.99	5.71	1.39	5.28	1.09	1.78	-999	-999	-999
8/22/2014 7:00	0.9	327	10.4	70	0	90	0.037775089	0.092	1.085	17.45454545	1.29	0.683	6.5	1.46	3.79	0.65	2.61	0.43	0.56	-999	-999	-999
8/22/2014 8:00	0.9	26	12	63	0	203	0.018218106	0.169	0.998	17.66666667	1.08	0.736	4.33	1.34	3.26	0.52	1.93	0.41	0.38	914.8	83.9	75.1
8/22/2014 9:00	0.3	157	12.5	63	0	208	-0.002644318	0.103	1.005	22.83333333	1.24	0.708	5.12	1.32	3.48	0.5	2.03	0.46	0.4	898.5	52.8	68.7
8/22/2014 10:00	2.4	136	13.5	61	0	549	-0.008006829	0.141	1.233	33.08333333	1.87	0.68	5.74	1.73	4.71	1.11	4.15	0.82	0.91	1118.2	77.1	153.4
8/22/2014 11:00	2.5	133	14.3	60	0	450	-0.015926562	0.107	1.296	39.18181818	-999	-999	-999	-999	-999	-999	-999	-999	-999	-999	-999	-999
8/22/2014 12:00	2.7	134	13.9	65	0	288	-0.022716511	0.198	2.548	53.58333333	2.68	0.802	6.46	2.85	9.34	1.67	9.54	2.84	3.85	1827.5	154.1	375.7
8/22/2014 13:00	2.8	137	14.3	65	0	363	-0.017923464	0.223	2.712	53	3.1	0.612	7.06	3.02	10.4	2.7	11.87	3.36	4.43	2058	188.7	439.4
8/22/2014 14:00	1.6	163	12.1	81	1.4	48	-0.018541492	0.068	2.436	56.85714286	3.27	0.675	7.95	3.54	11.77	2.65	14.18	3.87	4.89	2194.9	188	462.2
8/22/2014 15:00	1.5	196	10.5	90	0.2	157	-0.00747414	0.268	3.386	42.75	3.2	0.666	7.01	3.04	10.21	2.7	12.46	3.41	4.76	2038.5	172.8	411
8/22/2014 16:00	0.6	199	10.9	79	0	173	-0.001348995	0.133	1.038	28.08333333	2.345	0.774	6.865	2.03	6.13	1.505	4.695	1.265	1.56	972.05	57.45	132.7
8/22/2014 17:00	0.3	323	11.4	83	0	92	-0.013844286	0.121	1.254	23.91666667	2.89	0.752	6.6	2.1	6.87	1.59	6.72	1.66	2.2	-999	-999	-999
8/22/2014 18:00	0.2	70	11.3	88	0	45	-0.012301619	0.134	2.413	27.83333333	3.14	0.785	6.22	2.46	7.33	1.66	7.16	1.67	2.22	1106.2	84.9	193.6
8/22/2014 19:00	1.1	162	10.3	93	0.1	4	0.010729131	0.04	2.791	32.09090909	5.78	0.756	6.41	2.55	9.23	1.82	10.89	3.07	4.06	1567.6	125.3	284.2
8/22/2014 20:00	0.4	200	9.9	94	0.3	0	0.058859421	0.024	3.213	36.16666667	-999	-999	-999	-999	-999	-999	-999	-999	-999	-999	-999	-999
8/22/2014 21:00	0.1	219	9.7	94	0.4	0	0.090209393	0.046	2.759	27.58333333	6.74	0.666	7.96	3.43	11.92	3.48	13.16	3.38	4.66	2074.9	158	334.4
8/22/2014 22:00	0.3	244	8.9	94	0	0	0.102120127	0.051	2.431	17.5	6.62	0.891	6	2.85	11.03	1.7	12.94	3.01	4.05	-999	-999	-999
8/22/2014 23:00	0.3	196	8.9	94	0	0	0.124987036	0.002	2.031	16.27272727	6.59	0.656	6.22	2.53	10.43	2.1	11.2	2.94	4.24	-999	-999	-999
8/23/2014 0:00	0.1	324	9.1	94	0.8	0	-999	0.026	2.015	235	6.83	0.874	6.44	2.93	10.76	2.23	11.12	3.08	4.44	1837.1	146.1	307.8
8/23/2014 1:00	0.9	323	9.1	94	0.2	0	-999	0.001	1.391	213.3333333	5.8	0.795	5.78	2.59	8.76	1.23	8.86	2.35	3.59	-999	-999	-999
8/23/2014 2:00	0.9	314	8.6	93	0.1	0	0.118519479	0.016	0.825	139.0833333	3.34	0.847	5.81	2.04	6.1	1	6.1	1.19	1.8	-999	-999	-999
8/23/2014 3:00	1	310	7.7	91	0	0	0.076231696	0	0.209	76.91666667	1.44	0.909	5.37	1.57	3.68	0.55	2.65	0.37	0.5	-999	-999	-999
8/23/2014 4:00	1.5	292	7	91	0	0	0.068226401	-999	-999	53.90909091	1.4	0.943	6.66	1.76	3.98	0.83	2.53	0.51	0.65	-999	-999	-999
8/23/2014 5:00	0.6	301	6.8	90	0	0	0.040154774	0.012	0.222	56.83333333	1.21	0.979	4.8	1.49	3.42	0.87	2.15	0.34	0.42	-999	-999	-999
8/23/2014 6:00	0.7	301	5.5	93	0	6	0.043685178	-0.004	0.197	41.83333333	-999	-999	-999	-999	-999	-999	-999	-999	-999	-999	-999	-999
8/23/2014 7:00	0.5	314	6.5	90	0	110	0.020823189	-999	-999	28.91666667	1.32	1.263	6.1	1.65	3.85	1.57	2.07	0.36	0.63	-999	-999	-999
8/23/2014 8:00	1.9	53	12.1	66	0	372	-0.010625858	0.062	0.31	102.2727273	1.21	1.06	5.5	1.38	3.43	0.58	2.1	0.28	0.26	702.1	23.2	40.2
8/23/2014 9:00	1.6	31	13.3	60	0	421	-0.027571025	0.07	0.289	114.9166667	1.16	1.107	5.96	1.57	3.47	0.8	1.53	0.35	0.23	677.9	19.4	30.3
8/23/2014 10:00	2.4	21	13	59	0	295	-0.018388385	0.189	0.588	87.66666667	1.215	1.0905	5.865	1.715	3.92	0.815	2.085	0.445	0.47	835.45	42.9	83.7
8/23/2014 11:00	3.4	47	14.2	53	0	565	-0.033431482	0.06	0.289	120.25	1.18	0.813	5.36	1.52	3.48	0.74	1.54	0.29	0.27	745.7	30.5	46.7
8/23/2014 12:00	2.1	39	14.5	52	0	402	0.024306949	0.058	0.415	116.7272727	1.26	0.999	5.09	1.84	3.88	0.74	1.82	0.32	0.25	766.5	26.5	45.7
8/23/2014 13:00	2.9	27	12.7	64	0	394	0.088646965	0.052	0.274	97.5	1.24	0.957	5.5	1.69	3.73	0.76	2.57	0.25	0.28	852.9	36.7	66.8
8/23/2014 14:00	1.9	1	14.8	48	0.1	943	0.15353931	0.063	0.234	115.75	1.44	1.034	6.25	2.21	4.96	0.94	2.65	0.52	0.39	1089.8	62	91.7
8/23/2014 15:00	4.1	2	15.1	48	0	954	0.334024932	0.03	0.268	111	-999	-999	-999	-999	-999	-999	-999	-999	-999	-999	-999	-999
8/23/2014 16:00	3.8	4	13.5	51	0	749	0.582297513	0.065	0.267	165.2727273	1.67	1.197	6.27	2.55	5.11	1.82	2.62	0.43	0.42	985.7	24.1	43.1
8/23/2014 17:00	3.3	6	12.5	44	0	442	0.571385107	0.081	0.352	161.1666667	1.67	0.968	5.91	2.38	4.59	0.96	2.36	0.35	0.13	918.8	22.5	39.2
8/23/2014 18:00	2	316	12.5	31	0	178	0.452664297	0.024	0.328	227.6666667	1.65	0.777	5.9	2.13	4.36	1.07	2.11	0.26	0.09	902.9	15.1	23.5
8/23/2014 19:00	2.5	16	10.8	36	0	12	0.352646476	0.029	0.331	205.8333333	1.66	0.666	5.92	2.12	4.51	1.3	2.11	0.36	0.16	963.4	22.2	34.1
8/23/2014 20:00	4	26	9.5	48	0	0	0.305667882	0.014	0.358	202.0909091	1.7	0.851	6.51	2.26	4.93	1.52	2.92	0.46	0.3	1136.8	33.9	59.6
8/23/2014 21:00	1.1	328	7.7	52	0	0	0.259157812	0.008	0.384	218.6666667	1.55	0.769	5.09	1.93	4.29	1.04	2.18	0.42	0.16	1108.3	39	60.5
8/23/2014 22:00	1.5	304	6.3	57	0	0	0.190461858	0.006	0.435	216.3333333	1.75	0.812	6.2	2.39	4.67	0.96	2.87	0.38	0.29	-999	-999	-999
8/23/2014 23:00	0.2	282	5.3	61	0	0	0.161434006	0.004	0.365	185.5	1.74	0.79	5.4	2.45	4.53	1.09	2.52	0.43	0.31	1227.5	51.4	70.8
8/24/2014 0:00	1.2	39	6.7	53	0	0	-999	-0.015	0.318	255.6666667	1.62	0.741	5.37	2.21	4.54	1.02	2.58	0.41	0.25	1145.6	37.4	53
8/24/2014 1:00	0.7	23	6.4	57	0	0	-999	0.044	0.364	234.2272727	-999	-999	-999	-999	-999	-999	-999	-999	-999	-999	-999	-999
8/24/2014 2:00	1	315	7.2	51	0	0	0.108050064	0.008	0.369	191.4583333	1.705	0.695	5.84	2.285	4.55	1.205	2.415	0.39	0.25	-999	-999	-999
8/24/2014 3:00	2.5	312	8.5	43	0	0	0.078903848	0.009	0.355	255.5	1.72	0.824	5.56	2.22	4.78	1.32	2.39	0.27	0.18	988.2	27.3	39.7
8/24/2014 4:00	2.2	275	7.6	49	0	0	0.073234644	0.006	0.331	241.0833333	1.73	0.693	6.37	2.4	4.93	1.05	2.17	0.26	0.08	1128.5	28.6	43.2
8/24/2014 5:00	0.8	239	5	62	0	0	0.052940609	-0.016	0.352	183.0909091	1.67	0.715	6.01	2.4	4.74	1.8	2.59	0.33	0.25	1131.5	34.9	45.3
8/24/2014 6:00	0.9	226	4.6	65	0	7	0.040941975	0.021	0.383	198.4166667	1.71	0.718	5.95	2.38	4.79	1.02	2.38	0.32	0.28	1091.1	33.3	47.6
8/24/2014 7:00	0.5	182	5.1	65	0	95	0.027410632	0.055	0.461	224.3333333	1.67	0.669	5.76	2.45	4.85	1.01	2.61	0.3	0.33	1145.3	29.9	46.9
8/24/2014 8:00	1.4	121	10.2	46	0	378	0.009314148	0.079	0.525	247.8333333	1.54	0.657	5.03	1.82	4.16	0.92	2.52	0.31	0.2	1142	34.7	63.9
8/24/2014 9:00	2.2	112	11.7	40	0	572	-0.014945074	0.073	0.597	248.5454545	1.68	0.772	6.24	2.38	4.97	1.19	2.84	0.34	0.12	1205.9	40.8	86.2
8/24/2014 10:00	2.3	60	13.3	33	0	723	-0.029036201	0.075	0.575	274.9583333	-999	-999	-999	-999	-999	-999	-999	-999	-999	-999	-999	-999
8/24/2014 11:00	3	302	14.4	28	0	811	-0.012758861	0.051	0.485	242.25	1.65	0.755	5.95	2.33	4.53	0.78	2.46	0.38	-999	1089.9	25.8	50.7
8/24/2014 12:00	3.2	252	14.8	28	0	856	0.012664309	0.041	0.469	272.375	1.61	0.572	5.82	2.18	4.54	0.94	2.6	0.34	0.16	1031.5	24.1	43.3
8/24/2014 13:00	3	272	15.4	28	0	737	0.051914607	0.037	0.436	275.0909091	1.59	1.017	6.24	2.26	4.18	1.3	1.89	0.42	0.82	1000	20.2	38.3
8/24/2014 14:00	2	295	16.3	29	0	772	0.080225721	0.026	0.441	261.75	1.66	0.655	6.13	2.31	4.75	1.19	2.81	0.39	0.33	1079.2	18.2	30.4
8/24/2014 15:00	0.7	294	17.1	30	0	821	0.098857538	0.016	0.446	254.9583333	1.69	0.72	6.25	2.41	4.93	1.02	2.39	0.42	0.29	1030.6	19.7	30.4
8/24/2014 16:00	2.2	329	17.3	32	0	652	0.186988814	0.052	0.469	273.5833333	1.62	0.632	5.42	2.35	4.69	1.31	2.27	0.36	0.2	1011.5	19	31.8
8/24/2014 17:00	1.1	358	16.6	33	0	429	0.268247201	0.049	0.531	220.3636364	1.64	0.703	6.03	2.34	4.97	1.07	2.39	0.42	0.22	1064.1	24.8	39
8/24/2014 18:00	0.8	88	15.4	34	0	155	0.252100518	0.056	0.559	256.2083333	1.59	0.905	5.65	2.22	5.18	1.15	2.74	0.46	0.16	1283.4	56.3	65.3
8/24/2014 19:00	0.7	52	12.7	43	0	9	0.218866586	0.012	0.532	228.25	1.7	0.735	5.92	2.41	5.54	1.3	3.32	0.5	0.26	1401.3	60.8	74.4
8/24/2014 20:00	0.2	292	10.6	50	0	0	0.193309778	-0.006	0.621	198.3333333	-999	-999	-999	-999	-999	-999	-999	-999	-999	-999	-999	-999
8/24/2014 21:00	1	282	8.1	61	0	0	0.162391536	0.019	0.608	137.8636364	1.77	0.926	6.34	2.61	5.96	1.87	3.25	0.77	1.02	-999	-999	-999
8/24/2014 22:00	0.5	320	7.3	65	0	0	0.141118866	0.012	0.498	117.0833333	1.79	0.7035	5.345	2.275	5.575	1.315	3.21	0.7	0.78	-999	-999	-999
8/24/2014 23:00	0.6	259	7.4	69	0	0	0.106063186	-0.019	0.408	90.91666667	1.95	0.884	6.17	2.54	6.22	2.14	3.69	0.66	0.7	-999	-999	-999
8/25/2014 0:00	0.8	247	7.1	80	0	0	-999	0.013	0.694	97.5	2.54	0.71	4.47	2.7	7.1	1.18	5.47	1.22	1.76	-999	-999	-999
8/25/2014 1:00	0.5	319	7.5	81	0.1	0	-999	0.024	1.192	99.08333333	2.24	0.617	5.47	2.84	8.71	2.01	9.6	2.3	3.7	-999	-999	-999
8/25/2014 2:00	1.1	313	7.7	81	0.1	0	0.099741267	-0.002	0.909	152.4545455	2.16	0.677	5.47	3.52	8.14	1.96	8.04	1.84	2.51	-999	-999	-999
8/25/2014 3:00	1.1	299	6.8	81	0	0	0.074355625	0.006	0.717	113.9166667	2.24	0.623	5.69	2.97	8.19	2.27	7.72	1.82	2.36	-999	-999	-999
8/25/2014 4:00	0.7	313	5.1	87	0	0	0.07752982	-999	-999	79.08333333	2.44	0.763	5.1	2.6	7.95	2.04	7.26	1.7	2.3	-999	-999	-999
8/25/2014 5:00	1	281	6.3	81	0.1	0	0.075542118	0.003	1.006	124.0833333	-999	-999	-999	-999	-999	-999	-999	-999	-999	-999	-999	-999
8/25/2014 6:00	0.7	274	6.5	89	0.4	6	0.059732926	0.016	0.883	136.3636364	2.3	0.82	6.18	2.93	8.73	2.5	9.43	2.21	3.1	2865	279	689.1
8/25/2014 7:00	0.8	327	7.4	84	0.1	35	0.050913316	0.027	0.661	170.4166667	1.98	0.809	5.96	2.9	7.29	2.31	6.79	1.5	2.03	1965.3	159.1	359.7
8/25/2014 8:00	1.3	48	9.8	70	0	327	0.022582569	0.194	0.819	136.8333333	1.35	0.918	4.24	1.73	4.16	0.84	2.14	0.43	0.43	828.8	32.9	44.4
8/25/2014 9:00	1.7	134	11.3	64	0	453	-0.00067786	0.155	0.718	192.0833333	1.7	0.832	4.82	2.04	5.47	1.33	5.09	1.03	1.03	1494.8	97.6	228.2
8/25/2014 10:00	2.1	131	12	62	0	456	-0.015252651	0.083	0.693	245.5454545	1.82	0.765	6.52	2.33	5.98	1.4	5.04	0.93	0.97	1340.8	83.8	200.7
8/25/2014 11:00	1.2	174	13.3	60	0	481	-0.014787348	0.078	0.852	291.0833333	1.76	0.808	5.46	2.36	6.49	1.49	5.32	1.32	1.72	1534.3	98.9	229.9
8/25/2014 12:00	1.4	135	14.9	53	0	493	-0.028483816	0.13	1.342	325.4166667	1.72	0.821	6.43	2.34	6.59	1.36	5.48	1.18	1.37	1258.5	70.1	157.9
8/25/2014 13:00	1.8	186	13.9	60	0	366	-0.035606641	0.155	2.327	594.3333333	2.51	0.775	7.51	3.28	10.33	2.23	11.4	2.23	2.02	1601	130.3	343.7
8/25/2014 14:00	0.3	129	16.6	49	0	836	-0.022641824	0.147	2.026	565.0909091	3	0.629	7.23	3.88	15.38	3.45	20.65	4.68	5.24	3195.2	278	699.1
8/25/2014 15:00	2.1	159	16.4	51	0	486	-0.028239715	0.093	1.884	480.9166667	-999	-999	-999	-999	-999	-999	-999	-999	-999	-999	-999	-999
8/25/2014 16:00	2.1	148	14.6	58	0	214	0.037301144	0.136	3.098	848.9166667	3.99	0.661	8.485	5.24	19.21	4.34	24.415	5.485	4.815	2435.4	247.75	599.1
8/25/2014 17:00	1.8	162	14.3	60	0	188	0.091997308	0.127	3.588	825.8333333	5.55	0.587	9.45	6.5	23.74	5.75	32.31	7.62	7.16	4199.1	335.7	845.1
8/25/2014 18:00	1.9	159	14	62	0	131	0.11970955	0.243	5.873	857	6.34	0.643	9.77	6.31	23.26	5.25	32.49	7.62	7.17	3365.1	376.1	953.4
8/25/2014 19:00	1.4	202	12	69	0	26	0.138644815	0.056	4.137	685.5833333	6.89	0.626	8.69	5.52	19.14	4.81	26.21	6.47	6.75	2918.6	229.8	592.5
8/25/2014 20:00	0.5	242	9.7	79	0	0	0.144836159	0.044	3.173	459.0833333	7.06	0.463	6.9	4.77	18.35	4.62	25.4	6.94	9.86	-999	-999	-999
8/25/2014 21:00	0.9	290	9.1	82	0	0	0.156589849	0.028	3.248	488.75	6.32	0.484	8.02	5.31	20.87	6.14	29.2	7.81	10.51	-999	-999	-999
8/25/2014 22:00	0.9	280	7.6	86	0	0	0.155422855	0.024	2.927	406.4166667	6.32	0.471	7.39	4.83	19.58	5.21	28.02	7.27	10.06	3184.3	268.7	656.9
8/25/2014 23:00	0.7	266	6.3	89	0	0	0.146743309	0.006	1.881	268.7272727	6.07	0.569	7.75	5.01	18.97	4.96	26.54	7.48	11.01	-999	-999	-999
8/26/2014 0:00	0.7	325	5.8	89	0	0	-999	-0.01	1.195	178.1666667	-999	-999	-999	-999	-999	-999	-999	-999	-999	-999	-999	-999
8/26/2014 1:00	1.2	301	6.7	82	0	0	-999	0.002	0.857	139.5833333	2.7	0.601	5.45	2.35	7.85	1.78	7.69	2.15	3.15	-999	-999	-999
8/26/2014 2:00	0.9	294	6.1	84	0	0	0.081657121	0.027	0.97	195.75	3.05	0.498	6.39	2.59	8.34	1.7	10.41	2.63	4.19	-999	-999	-999
8/26/2014 3:00	0.5	255	5.6	88	0	0	0.047544757	0.018	1.103	116.8181818	2.88	0.536	5.68	2.43	7.74	2.61	8.58	2.22	3.51	-999	-999	-999
8/26/2014 4:00	0.9	319	5.5	89	0	0	0.039309695	0.031	1.15	170	3.58	0.622	6.135	2.73	9.59	2.34	11.43	2.96	4.625	-999	-999	-999
8/26/2014 5:00	0.5	309	5	91	0	0	0.02268845	-0.001	1.312	214	3.82	0.511	6	2.83	10.51	3.05	13.52	3.41	5.35	-999	-999	-999
8/26/2014 6:00	1	300	5.4	89	0	11	0.001873176	0.029	1.303	194.6666667	3.22	0.555	5.89	2.47	8.47	1.5	10.54	2.56	3.95	-999	-999	-999
8/26/2014 7:00	0.3	310	6.1	89	0	79	0.006064134	0.179	1.442	115.9090909	3	0.639	5.43	2.29	8.28	1.31	9.69	2.31	3.71	-999	-999	-999
8/26/2014 8:00	0.3	341	9.3	82	0	199	-0.014011088	0.551	2.915	320.4166667	4.02	0.525	6.95	2.87	10.86	2.41	13.58	3.52	5.03	1847.9	147.6	336.8
8/26/2014 9:00	0.7	131	12.1	69	0	281	-0.038909395	0.281	2.158	380.8333333	-999	-999	-999	-999	-999	-999	-999	-999	-999	-999	-999	-999
8/26/2014 10:00	0.6	141	14.5	60	0	617	-0.045160442	0.145	1.537	337.25	3.04	0.682	6.52	2.81	9.15	1.79	10.43	2.55	3.44	1387.9	89.3	206.7
8/26/2014 11:00	0.4	324	17.7	37	0	602	-0.041552341	0.062	0.694	170.5454545	1.26	0.788	7	1.82	3.51	0.96	1.69	0.38	0.43	635.6	12.7	24.4
8/26/2014 12:00	0.7	331	17.4	36	0	354	-0.022272226	0.117	0.78	143.75	1.15	0.816	6.92	1.45	2.46	0.98	1.12	0.37	0.21	555.1	14	23.9
8/26/2014 13:00	1.5	43	17.6	37	0	323	0.058276787	0.081	0.6	148.25	1.22	0.745	8.12	1.75	3.07	0.76	1.22	0.36	0.17	655.2	12.3	29.6
8/26/2014 14:00	2.3	138	15.7	59	0	224	0.079725093	0.089	1.992	454.1666667	2.33	0.573	6.21	2.58	10.02	2.1	11.46	2.64	2.14	1755.3	112.2	257
8/26/2014 15:00	2.4	153	12.2	74	0.2	104	0.088394081	0.069	1.413	314.0909091	2.31	0.667	7.09	2.43	7.28	1.56	6.79	1.58	1.54	1067.3	59.5	129.1
8/26/2014 16:00	0.6	153	10.6	87	0.8	79	0.111580306	0.055	0.789	176.0833333	2.02	0.58	7.19	1.9	4.55	1.17	3.28	0.61	0.49	755.5	27.7	48
8/26/2014 17:00	1.6	359	10.7	82	0	46	0.116635342	0.034	0.757	209.0833333	1.53	0.604	7.01	1.75	4.29	0.97	3.35	0.66	0.63	-999	-999	-999
8/26/2014 18:00	0.9	355	10.9	79	0	26	0.113045164	0.019	0.902	193.4166667	1.93	0.609	6.23	1.95	4.69	1.09	3.87	0.68	0.86	795.5	38.4	78.3
8/26/2014 19:00	0.6	254	10	88	0.1	4	0.094200474	0.031	0.713	121.6666667	-999	-999	-999	-999	-999	-999	-999	-999	-999	-999	-999	-999
8/26/2014 20:00	1.2	183	9.3	90	0.1	0	0.093120832	0.016	0.47	110.8181818	1.76	0.684	5.35	1.74	4.17	1.13	3.35	0.72	0.91	-999	-999	-999
8/26/2014 21:00	1	288	9	88	0	0	0.086364189	-0.013	0.207	85.75	1.8	0.673	8.66	1.54	3.69	0.74	2.69	0.53	0.59	-999	-999	-999
8/26/2014 22:00	1	321	9	88	0	0	0.064177836	0.032	0.292	100.5833333	1.4	0.777	5.34	1.63	4.14	1	3.44	0.54	0.8	-999	-999	-999
8/26/2014 23:00	0.5	276	8.6	90	0	0	0.057584603	0.04	0.292	51.07692308	1.3	0.633	8.9	1.59	3.42	0.52	2.95	0.37	0.51	-999	-999	-999
8/27/2014 0:00	1	309	8.7	90	0.1	0	-999	-0.006	0.205	45.09090909	1.26	0.652	8.23	1.43	3.14	0.44	2.01	0.41	0.74	-999	-999	-999
8/27/2014 1:00	0.6	302	8.6	91	0.1	0	-999	0.024	0.371	66.91666667	1.23	0.772	8.95	1.38	2.8	0.85	2.08	0.31	0.49	-999	-999	-999
8/27/2014 2:00	0.6	248	8.2	94	0	0	0.055759068	0.017	0.282	28.16666667	1.36	0.822	6.68	1.48	3.16	0.7	2.04	0.28	0.43	-999	-999	-999
8/27/2014 3:00	0.7	243	7.5	94	0	0	0.023676337	-0.005	0.182	39.33333333	1.33	0.675	6.17	1.33	2.86	0.59	1.7	0.34	0.33	-999	-999	-999
8/27/2014 4:00	1	307	7.6	92	0	0	0.015859127	-999	-999	40	1.38	0.767	5.4	1.3	3.12	0.62	2.3	0.48	0.72	-999	-999	-999
8/27/2014 5:00	0.9	311	8	90	0	0	0.001282584	0.021	0.507	54.66666667	-999	-999	-999	-999	-999	-999	-999	-999	-999	-999	-999	-999
8/27/2014 6:00	1	309	8.3	89	0	4	-0.018623996	0.193	1.155	53.58333333	1.44	0.617	4.98	1.6	3.82	0.81	3.11	0.66	1.02	-999	-999	-999
8/27/2014 7:00	0.7	323	8.8	92	1	22	-0.028486646	-999	-999	51.5	1.29	0.727	5.55	1.46	3.62	0.97	2.82	0.5	0.68	-999	-999	-999
8/27/2014 8:00	1.3	1	8.7	92	0.6	68	-0.025540929	0.533	1.877	115.1818182	1.18	0.681	5.79	1.38	3.17	0.65	2.45	0.37	0.61	-999	-999	-999
8/27/2014 9:00	0.6	329	10.2	82	0	246	-0.042457845	0.572	1.738	92.83333333	1.04	0.808	7.05	1.31	3.8	0.48	1.64	0.26	0.16	695.9	28.2	62
8/27/2014 10:00	0.6	166	12	71	0	432	-0.04849829	0.273	0.912	119.5	-999	-999	-999	-999	-999	-999	-999	-999	-999	-999	-999	-999
8/27/2014 11:00	1.1	207	13.2	63	0	500	-0.053081524	0.028	0.199	126	1.11	0.829	7.68	1.39	3.1	0.67	1.86	0.35	0.27	694.5	23	44.4
8/27/2014 12:00	1.3	117	14.8	51	0	542	-0.061051944	0.066	0.312	105.7272727	1.11	0.954	6.78	1.35	2.92	0.45	1.84	0.25	0.38	678.3	22.1	45.8
8/27/2014 13:00	0.9	95	16.9	39	0	847	-0.051245387	0.076	0.247	96.33333333	0.99	0.662	6.68	1.18	1.84	0.49	1.12	0.24	0.29	-999	-999	-999
8/27/2014 14:00	1.2	71	16.1	43	0	480	0.014538936	0.086	0.422	132.75	1.11	0.621	6.56	1.43	2.5	0.79	1.39	0.21	0.36	599.5	15.5	25.3
8/27/2014 15:00	2.3	54	14.5	48	0	197	0.129466262	0.435	1.559	168.4166667	1.44	0.542	6.78	1.61	3.89	0.72	3.28	0.66	0.69	811.8	36.8	84.9
8/27/2014 16:00	1.8	59	15.8	42	0	605	0.169304641	0.14	0.689	203.3636364	1.465	0.709	6.585	1.855	4.19	0.895	2.895	0.625	0.57	852.2	37.05	81.2
8/27/2014 17:00	2.1	321	15.9	38	0	449	0.176794524	0.041	0.295	201.5	1.37	0.721	5.91	1.82	3.62	0.72	2.09	0.31	0.19	766.6	23.7	36.5
8/27/2014 18:00	2.3	335	13.2	41	0	74	0.207627244	0.058	0.429	225.5833333	1.47	0.823	5.89	1.9	4.01	0.67	2.28	0.52	0.37	837.1	22.7	34.3
8/27/2014 19:00	1.7	53	11.6	49	0	18	0.197653162	0.035	0.422	234	1.48	0.726	6.03	1.85	4.03	0.91	2.5	0.46	0.3	945.6	41.7	48.5
8/27/2014 20:00	0.5	290	9.1	67	0	0	0.175572084	0.045	0.724	197.8181818	-999	-999	-999	-999	-999	-999	-999	-999	-999	-999	-999	-999
8/27/2014 21:00	0.6	248	8.3	68	0	0	0.154022155	0.024	0.628	185.5	1.84	0.853	7.2	2.19	4.66	2.09	3.1	0.66	0.7	-999	-999	-999
8/27/2014 22:00	0.6	310	7.6	71	0	0	0.140534255	0.029	0.493	159.8333333	1.67	0.685	5.76	1.93	4.55	1.22	3.35	0.74	0.81	-999	-999	-999
8/27/2014 23:00	0.6	343	7	71	0	0	0.118006352	0.012	0.34	154.9166667	1.97	0.771	6.71	2.02	4.44	1.07	3.04	0.52	0.61	-999	-999	-999
8/28/2014 0:00	0.8	278	5.9	77	0	0	-999	0.021	0.341	143.2727273	1.71	0.666	5.43	1.9	3.95	1.1	2.61	0.45	0.55	-999	-999	-999
8/28/2014 1:00	0.9	312	5.8	79	0	0	-999	0	0.382	106.25	1.58	0.717	5.35	1.77	4.26	1.02	3.05	0.6	0.76	-999	-999	-999
8/28/2014 2:00	0.9	274	5.3	81	0	0	0.069841782	-0.001	0.256	105.0833333	1.77	0.654	6.27	1.87	4.48	1.1	3.42	0.69	0.91	-999	-999	-999
8/28/2014 3:00	1	312	5.6	79	0	0	0.038231704	0.02	0.359	103.25	1.87	0.629	5.64	1.76	4	0.93	2.9	0.5	0.63	-999	-999	-999
8/28/2014 4:00	0.8	272	5	82	0	0	0.024837389	0.042	0.27	80	1.5	0.721	5.74	1.76	4.03	0.76	3.38	0.53	0.65	-999	-999	-999
8/28/2014 5:00	1.9	331	7.6	67	0	0	0.012189876	0.038	0.258	119.6363636	1.62	0.621	6.34	1.72	3.97	0.84	2.65	0.51	0.52	-999	-999	-999
8/28/2014 6:00	1.5	333	7.9	66	0	15	-0.011200867	0.126	0.871	152.9166667	-999	-999	-999	-999	-999	-999	-999	-999	-999	-999	-999	-999
8/28/2014 7:00	2.1	347	9.2	61	0	114	-0.025045278	0.023	0.384	156.8333333	1.45	0.781	6.84	2.03	4.81	1.48	3.4	0.66	0.76	1211.3	76.3	216.5
8/28/2014 8:00	2.4	328	12.1	51	0	409	-0.03489891	0.111	0.39	177	1.36	0.656	5.97	1.7	4.5	0.92	3.6	0.68	0.55	1131.1	70.1	108.2
8/28/2014 9:00	2.3	327	12.4	51	0	416	-0.062374301	0.112	0.539	145	1.375	0.6165	5.435	1.77	4.88	0.965	3.405	0.715	0.555	1299.25	95.05	135.8
8/28/2014 10:00	2.1	351	11.6	56	0	231	-0.076917368	0.458	1.235	152.6666667	1.39	0.595	5.66	1.79	4.67	1.23	3.98	0.77	0.74	1328.7	97.1	143.4
8/28/2014 11:00	1	32	9.4	78	0.9	138	-0.078749689	0.255	1.133	141.75	1.58	0.651	6.63	1.9	5.54	1.14	4.65	0.95	1.1	1425.7	91.1	152.9
8/28/2014 12:00	0.1	342	9.6	77	0.4	261	-0.07686077	0.229	0.775	146.9166667	1.36	0.552	5.74	2.01	5.38	1.13	4.28	0.9	0.98	1336	90	139.6
8/28/2014 13:00	2.5	335	7.4	80	1.5	154	-0.048676446	0.239	0.757	176.8181818	1.44	0.606	6.08	2.35	6.08	1.3	4.64	0.89	0.63	1065	49.5	84.9
8/28/2014 14:00	2.3	339	8.6	72	0.2	252	-0.039379538	0.098	0.375	179.0833333	1.54	0.48	5.84	2.28	5.44	0.98	3.58	0.61	0.33	1038	38.7	55.9
8/28/2014 15:00	2.8	337	11.7	57	0	550	-0.04069018	0.073	0.372	192.8333333	-999	-999	-999	-999	-999	-999	-999	-999	-999	-999	-999	-999
8/28/2014 16:00	3.3	331	13.3	47	0	478	-0.044756396	0.035	0.314	210.1666667	1.54	0.582	5.7	2.28	5.75	1.2	3.45	0.76	0.63	1140.8	63.1	90.3
8/28/2014 17:00	2.8	339	13.4	49	0	314	-0.042572442	0.069	0.418	216.2727273	1.67	0.559	6.12	2.67	6.49	1.17	4.72	0.61	0.37	1246.6	110.4	98.5
8/28/2014 18:00	2.9	334	12.4	52	0	122	-0.032288253	0.116	0.624	250.6666667	1.7	0.65	6.57	3.1	7.17	1.56	5.72	1.08	0.67	1468.4	91	128.7
8/28/2014 19:00	2.7	341	11.4	53	0	6	0.001171091	0.013	0.371	240.0833333	1.67	0.491	6.46	2.56	7.15	1.18	5.95	1.26	1.01	1481.6	124.5	226.7
8/28/2014 20:00	2.2	340	11.5	51	0	0	0.013148434	0.014	0.379	236.1666667	1.55	0.573	5.34	2.14	6.35	1.45	5.16	1.02	1.05	1468.1	97.3	170.6
8/28/2014 21:00	1.4	342	10.7	56	0	0	0.016122217	0.025	0.363	225.1818182	1.55	0.465	5.72	2.22	6.29	1.06	5.06	0.92	0.61	1510.8	96.9	150.2
8/28/2014 22:00	1.4	310	8.7	65	0	0	0.01548646	0.034	0.496	171.1666667	1.55	0.469	5.49	2.2	6.14	1.44	4.935	1.025	1.14	1700.7	111.25	161.2
8/28/2014 23:00	2.1	329	10.3	55	0	0	0.004243325	0.014	0.449	203	1.6	0.444	5.79	2.2	5.67	1.53	4.25	0.72	0.54	-999	-999	-999
8/29/2014 0:00	2.4	331	10.9	47	0	0	-999	0.002	0.338	201.4166667	-999	-999	-999	-999	-999	-999	-999	-999	-999	-999	-999	-999
8/29/2014 1:00	2.4	334	11	45	0	0	-999	0.002	0.409	214.1666667	1.63	0.548	5.68	2.28	5.97	1.56	4.35	0.81	0.89	1589.1	99	127
8/29/2014 2:00	2.4	332	10.6	48	0	0	0.061313192	0.017	0.523	216.4545455	1.65	0.509	6.11	2.05	6.22	1.41	4.05	0.58	0.37	1531.1	100.1	128
8/29/2014 3:00	2.2	343	10.6	47	0	0	0.035961681	0.012	0.472	191.5	1.53	0.407	5.69	1.97	5.27	1.19	3.59	0.65	0.43	1368.3	81.6	105.9
8/29/2014 4:00	2	330	10.5	49	0	0	0.035615571	-999	-999	197.25	1.41	0.55	4.86	1.81	4.61	1.07	2.95	0.51	0.45	1227.8	65.9	78
8/29/2014 5:00	2.2	320	10.6	51	0	0	0.023627052	0.025	0.523	194.3333333	1.55	0.453	4.9	2.03	5.03	0.81	3.39	0.54	0.43	1216.1	62.8	79.6
8/29/2014 6:00	2.1	327	10.6	54	0	6	0.013341303	0.13	0.965	197.2727273	1.54	0.397	5.33	2.01	4.92	1.09	3.29	0.38	0.27	-999	-999	-999
8/29/2014 7:00	2.1	334	11.3	55	0	89	0.00291538	0.075	0.744	160.6666667	1.43	0.59	5.34	1.96	5.11	1.1	3.24	0.58	0.6	-999	-999	-999
8/29/2014 8:00	2.3	318	14.2	46	0	364	-0.00013074	0.125	0.723	167	1.57	0.644	4.62	2.53	4.69	0.81	3.62	0.48	0.34	1015	54.6	81.3
8/29/2014 9:00	3	318	15.5	40	0	560	-0.018564407	0.097	0.505	168.6666667	1.47	0.471	4.65	1.65	4.19	1	2.53	0.48	0.29	949.3	51.6	91.2
8/29/2014 10:00	2.8	312	16.4	40	0	673	-0.038922092	0.081	0.462	180.5454545	-999	-999	-999	-999	-999	-999	-999	-999	-999	-999	-999	-999
8/29/2014 11:00	3.2	301	17.2	35	0	763	-0.015447625	0.106	0.407	179.25	1.48	0.472	4.97	1.71	3.94	0.74	3.18	0.6	0.53	822.2	33.8	80.3
8/29/2014 12:00	0.1	249	15.4	37	0	457	0.085865241	0.061	0.372	155.8333333	1.54	0.554	6.1	1.74	3.24	0.89	2.34	0.47	0.52	706.4	17.9	31.9
8/29/2014 13:00	2.2	123	15.7	47	0	531	0.141138356	0.152	1.302	308	1.6	0.498	5.73	2.09	4.97	1.04	2.78	0.73	0.7	1037.2	41.7	81.3
8/29/2014 14:00	1.6	145	13.4	-999	6.4	169	0.144709746	0.127	1.659	364.8181818	2.55	0.432	6.31	2.78	9.99	2.05	11.55	2.83	3.16	3852.6	322.6	851.1
8/29/2014 15:00	1.1	268	6.4	-999	4.5	28	0.16686257	0.26	2.064	273.5833333	2.94	0.4	7.35	2.73	8.09	1.8	8.08	1.94	2.72	-999	-999	-999
8/29/2014 16:00	0.7	308	7.8	-999	0	144	0.156984056	0.209	1.453	149.4166667	1.82	0.4005	4.985	1.98	5.32	1.17	4.155	1.015	1.425	-999	-999	-999
8/29/2014 17:00	1.9	336	12.8	-999	0	365	0.110470402	0.282	1.121	192.6666667	1.63	0.697	6.01	1.93	4.04	1.13	2.9	0.6	0.73	-999	-999	-999
8/29/2014 18:00	2.2	308	10.9	-999	0	58	0.11050606	0.048	0.502	200.9090909	1.88	0.404	5.67	2.22	4.22	1.11	2.96	0.49	0.52	896.1	32.5	51.6
8/29/2014 19:00	0.9	301	8.7	-999	0	5	0.100463814	0.029	0.433	134.5	-999	-999	-999	-999	-999	-999	-999	-999	-999	-999	-999	-999
8/29/2014 20:00	0.8	290	7.5	-999	0.3	0	0.097457832	0.011	0.834	104.9166667	1.72	0.785	5.98	2.06	5.3	1.67	3.67	0.8	1.16	-999	-999	-999
8/29/2014 21:00	1	298	6.7	-999	0	0	0.083011175	0.239	1.026	82.33333333	1.87	0.624	5.35	1.82	4.72	1.05	3.63	0.74	0.91	-999	-999	-999
8/29/2014 22:00	1.4	274	5.9	-999	0	0	0.076979497	0.048	0.645	100.3333333	1.81	0.438	5.97	2.28	5.77	1.48	4.38	0.84	1.44	-999	-999	-999
8/29/2014 23:00	1.2	279	5	-999	0	0	0.082146446	0	0.699	82.36363636	1.83	0.45	4.67	2.23	5.79	1.63	4.75	0.82	1.3	-999	-999	-999
8/30/2014 0:00	1.1	292	4.4	-999	0	0	-999	0.037	0.694	70.75	1.59	0.555	5.12	2.36	6.15	1.19	4.25	0.85	1.37	-999	-999	-999
8/30/2014 1:00	1.4	269	4.7	-999	0	0	-999	-0.006	0.644	82	1.82	0.486	5.605	2.46	6.545	1.855	5.235	1.13	1.86	-999	-999	-999
8/30/2014 2:00	0.3	308	4.5	-999	0	0	-0.018741341	0.003	0.806	98.41666667	1.67	0.481	5.75	2.64	6.74	1.83	5.63	1.17	1.94	-999	-999	-999
8/30/2014 3:00	0.4	326	5.8	-999	0	0	-0.035868784	0.002	0.59	161.6363636	1.79	0.506	5.34	3.25	7.46	1.91	6.42	1.6	2.39	1869.4	102.3	173.2
8/30/2014 4:00	1.2	304	5.4	-999	0	0	-0.032147419	0.004	0.515	91.41666667	-999	-999	-999	-999	-999	-999	-999	-999	-999	-999	-999	-999
8/30/2014 5:00	1.1	303	4.8	-999	0	0	-0.039819538	-0.008	0.429	93.08333333	1.49	0.632	5.47	2.21	5.47	2.52	3.74	0.86	1.41	-999	-999	-999
8/30/2014 6:00	1.1	317	5	-999	0	10	-0.045038606	0.001	0.526	106.75	1.62	0.459	4.96	2.17	5.4	1.45	4.73	0.99	1.53	-999	-999	-999
8/30/2014 7:00	1	312	6.1	-999	0	120	-0.059497681	0.3	1.388	66.45454545	1.61	0.636	6.09	2.08	5.68	1.67	4.04	1.05	1.74	-999	-999	-999
8/30/2014 8:00	0.9	359	14.2	-999	0	367	-0.075042585	0.161	0.844	205	1.52	0.472	5.41	2.06	5.42	0.96	4.13	0.94	1.15	1443.2	73.3	125.1
8/30/2014 9:00	0.8	144	16.7	-999	0	545	-0.086174845	0.06	0.516	197.3333333	1.55	0.475	5.34	2.23	5.34	1.27	3.9	0.88	0.97	1187.8	46.7	87.9
8/30/2014 10:00	2.5	295	18.3	-999	0	703	-0.098136784	0.053	0.484	172.8333333	1.62	0.476	6	1.82	4.11	0.98	3.28	0.6	0.65	1032.7	48.1	92.6
8/30/2014 11:00	3.1	283	18.7	-999	0	820	-0.025068038	0.122	0.666	166.1818182	1.56	0.563	6.26	2.03	3.95	0.85	3.06	0.47	0.59	961.3	53	131.7
8/30/2014 12:00	4	280	18.5	-999	0	730	0.121755066	0.075	0.595	164.1666667	1.5	0.419	5.82	2.13	5.23	0.96	3.02	0.73	0.79	1228.2	53.4	81.4
8/30/2014 13:00	3.5	288	17.4	-999	0	240	0.24112545	0.157	0.842	204.25	1.62	0.478	6.66	2.46	5.37	1.3	3.27	0.7	0.84	1261.1	51.2	93
8/30/2014 14:00	1.7	343	16.5	-999	0	317	0.261550342	0.081	0.569	163.6666667	-999	-999	-999	-999	-999	-999	-999	-999	-999	-999	-999	-999
8/30/2014 15:00	1.4	279	18.9	-999	0	632	0.200894889	0.07	0.508	104.0909091	1.57	0.597	7.27	2.25	5.28	1.48	3.16	0.74	0.97	1013.5	45.8	78
8/30/2014 16:00	2.6	324	17.6	-999	0.1	325	0.177894649	0.058	0.366	87.66666667	1.38	0.569	7.28	1.96	4.07	0.91	2.22	0.42	0.45	-999	-999	-999
8/30/2014 17:00	0.6	2	12.7	-999	0.1	157	0.179884791	0.037	0.339	102.75	1.425	0.4545	6.325	2.035	4.18	0.875	2.46	0.42	0.325	867.6	33.55	65.3
8/30/2014 18:00	0.2	307	14	-999	0	103	0.166811493	0.132	0.826	110.25	1.54	0.426	6.89	2.15	4.49	0.96	2.95	0.6	0.49	1104.8	61.5	100.1
8/30/2014 19:00	1.2	309	10.6	-999	1.2	1	0.139876886	0.027	0.605	98.41666667	1.48	0.4	7.2	1.85	4.05	0.88	2.6	0.4	0.48	996.4	62.9	77.6
8/30/2014 20:00	0.8	255	8.9	-999	0	0	0.147325142	0.052	0.684	89	1.72	0.448	7.08	1.99	5.06	1.17	3.39	0.68	0.79	1345.8	64.9	108.2
8/30/2014 21:00	1	285	8.4	-999	0	0	0.114512365	0.012	0.58	77.66666667	1.58	0.465	6.05	2.08	4.99	1.24	3.59	0.73	0.8	2368.9	114	161.5
8/30/2014 22:00	0.9	296	7.2	-999	0	0	0.101946321	0.042	0.537	64.41666667	1.65	0.397	6.59	2.19	4.88	1.3	3.29	0.55	0.52	-999	-999	-999
8/30/2014 23:00	0.7	288	6.4	-999	0	0	0.082411846	0.001	0.45	42.75	-999	-999	-999	-999	-999	-999	-999	-999	-999	-999	-999	-999
8/31/2014 0:00	1	309	7.4	-999	0	0	-999	0.018	0.346	28.18181818	1.65	0.703	5.44	2.04	4.84	2.08	2.97	0.68	0.87	-999	-999	-999
8/31/2014 1:00	1.4	348	8.6	-999	0	0	-999	0.007	0.313	75.66666667	1.75	0.535	6.09	2.01	5.25	1.4	3.04	0.75	1.14	-999	-999	-999
8/31/2014 2:00	0.7	283	7.8	-999	0	0	-0.040684107	0.037	0.203	55.45454545	1.64	0.546	5.59	1.91	4.4	1.07	2.64	0.49	0.62	-999	-999	-999
8/31/2014 3:00	0.9	267	6.6	-999	0	0	-0.044429409	0.029	0.147	41.25	1.72	0.55	5.75	1.9	4.3	1.11	2.62	0.54	0.65	-999	-999	-999
8/31/2014 4:00	0.6	247	8.2	-999	0	0	-0.055219175	-999	-999	37.8	1.67	0.619	5.49	1.87	4.37	0.84	3.15	0.48	0.63	-999	-999	-999
8/31/2014 5:00	1.7	358	10.2	-999	0	0	-0.072965193	0.013	0.196	50.33333333	1.63	0.4725	5.41	2.045	4.28	0.97	2.955	0.565	0.565	924.35	36.35	52.7
8/31/2014 6:00	1.7	304	12.2	-999	0	4	-0.100207257	0.029	0.304	54.08333333	1.77	0.536	6.84	2.23	4.6	0.93	2.94	0.43	0.23	876.6	23.5	45.6
8/31/2014 7:00	3.3	251	14	-999	0	39	-0.092654309	-999	-999	43.2	1.91	0.737	7.68	2.49	4.94	1.07	3.1	0.38	0.3	770.6	19.6	41
8/31/2014 8:00	2.7	255	12.4	-999	0.2	165	-0.123707549	0.017	0.343	50.90909091	-999	-999	-999	-999	-999	-999	-999	-999	-999	-999	-999	-999
8/31/2014 9:00	2.5	248	12	-999	0.5	211	-0.138979886	0.034	0.316	64.75	1.8	0.809	5.25	2.14	4.84	0.94	2.65	0.34	0.22	910.3	34.8	53.9
8/31/2014 10:00	0.9	262	8.6	-999	1.9	188	-0.166201625	0.036	0.335	66.5	2.02	0.744	7.26	2.37	5.24	1.05	3.57	0.57	0.61	943.6	46	70.6
8/31/2014 11:00	1.6	202	11.9	-999	0.1	662	-0.151363895	0.075	0.267	65.75	1.9	1.023	7.74	2.27	5.11	1	3.09	0.38	0.16	969	37.7	65.5
8/31/2014 12:00	3.1	211	13.3	-999	0.1	819	-0.149424558	0.03	0.3	55.90909091	1.87	0.823	6.73	2.2	5.21	1.18	3.08	0.51	0.27	913.2	33.1	60.2
8/31/2014 13:00	1.3	213	15.1	-999	0	687	-0.153559614	0.04	0.473	95.16666667	1.98	0.811	7.46	2.6	5.56	1.31	3.39	0.56	0.36	1081	44.2	83.9
8/31/2014 14:00	1.1	254	13.8	-999	0.6	371	-0.169185993	0.058	0.558	113.25	1.88	0.707	6.8	2.37	5.38	1.05	3.71	0.58	0.42	1019.4	53.8	109.7
8/31/2014 15:00	0.5	229	14.8	-999	0	330	-0.159941739	0.026	0.48	107.9166667	1.86	0.69	7.46	2.26	5.55	1.31	3.56	0.81	1.27	1104.5	53.6	89.4
8/31/2014 16:00	2.4	341	14.8	-999	0	213	-0.162020497	0.061	0.515	184.6666667	1.63	0.57	6.9	2.31	4.91	1.36	4.05	0.82	0.97	-999	-999	-999
8/31/2014 17:00	1.3	345	13.7	-999	0	103	-0.151135841	0.038	0.585	172.0909091	1.58	0.604	6.49	2.06	5.05	1.07	3.94	0.89	0.91	1160.4	65.1	141.7
8/31/2014 18:00	1.4	337	13.2	-999	0	47	-0.136369408	0.089	0.881	203.9166667	-999	-999	-999	-999	-999	-999	-999	-999	-999	-999	-999	-999
8/31/2014 19:00	0.8	310	11.9	-999	0	4	-0.135611337	0.038	0.931	213.0833333	1.56	0.462	6.3	2.36	5.53	2.32	4.63	1.25	1.43	-999	-999	-999
8/31/2014 20:00	1.4	304	11.7	-999	0.1	0	-0.110119269	0.017	0.846	246.3333333	1.635	0.528	6.795	2.545	6.995	1.79	6.3	1.805	2.21	-999	-999	-999
8/31/2014 21:00	1.4	342	10.4	-999	0	0	-0.104319974	0.081	1.168	242.6363636	1.54	0.457	5.96	2.63	7.05	1.67	7.05	2.09	3.05	-999	-999	-999
8/31/2014 22:00	1.5	326	9.9	-999	0	0	-0.112377698	0.021	0.851	258	1.58	0.391	6.24	2.46	6.65	2.06	6.01	1.67	2.05	2019.8	158.6	293.3
8/31/2014 23:00	0.4	281	7	-999	0	0	-0.099412451	0.006	0.772	178.9166667	1.66	0.439	5.32	2.45	6.41	1.59	6.23	1.73	2.35	2058	163.6	299.2
9/1/2014 0:00	0.9	302	5.3	-999	0	0	-999	0.014	0.739	-999	1.71	0.513	5.62	2.29	7.1	1.85	7.56	1.98	2.85	-999	-999	-999
9/1/2014 1:00	0.7	309	4.3	-999	0	0	-999	0.029	0.762	-999	1.84	0.485	5.75	2.51	7.42	1.98	8.16	2.08	3.01	-999	-999	-999
9/1/2014 2:00	0.3	305	3.3	-999	0	0	0.063379249	0.002	0.835	-999	1.99	0.493	5.75	2.72	8.44	2.4	9.92	2.67	4.3	-999	-999	-999
9/1/2014 3:00	0.6	287	2.7	-999	0	0	0.040929178	0.029	0.816	-999	-999	-999	-999	-999	-999	-999	-999	-999	-999	-999	-999	-999
9/1/2014 4:00	0.7	300	2.5	-999	0	0	0.041525115	0.021	0.992	-999	2.04	0.55	5.56	2.6	8.19	2.21	8.86	2.4	3.55	-999	-999	-999
9/1/2014 5:00	0.6	293	2.6	-999	0	0	0.043235104	0	0.911	-999	1.94	0.485	5.25	2.42	6.99	2.19	7.81	1.72	2.89	-999	-999	-999
9/1/2014 6:00	0.7	293	3	-999	0	6	0.035069488	-0.031	0.673	-999	1.79	0.453	5.54	2.36	5.55	2	4.75	1	1.65	-999	-999	-999
9/1/2014 7:00	0.2	189	3.5	-999	0	86	0.029949512	0.07	0.79	-999	1.685	0.426	5.61	2.18	5.1	1.315	3.485	0.695	1.04	-999	-999	-999
9/1/2014 8:00	0.7	103	9.7	-999	0	351	0.005810485	0.104	0.818	-999	1.4	0.464	4.83	2.06	4.48	0.92	3.22	0.66	0.54	1431	83	175.6
9/1/2014 9:00	1.3	302	11.9	-999	0	533	-6.37E-05	0.107	0.538	-999	1.47	0.49	5.73	2.15	3.86	0.74	2.7	0.42	0.34	972.6	20.5	42.7
9/1/2014 10:00	1.6	318	13	-999	0	707	-0.004952285	-0.001	0.339	-999	1.6	0.473	6.47	2.25	4.5	1.13	2.71	0.35	0.35	1091.6	39.2	59.3
9/1/2014 11:00	1.5	355	13.8	-999	0	748	-0.006600146	0.056	0.451	-999	1.71	0.4	11.48	2.79	5.31	1.15	2.94	0.4	0.54	1107.4	40.3	69.1
9/1/2014 12:00	1	311	14.4	-999	0	788	0.094842112	0.043	0.402	-999	-999	-999	-999	-999	-999	-999	-999	-999	-999	-999	-999	-999
9/1/2014 13:00	1.6	296	15.2	-999	0	760	0.182598176	0.048	0.318	-999	1.37	0.556	5.41	2.03	3.99	1.04	2.11	0.34	0.28	983.4	26.3	58.4
9/1/2014 14:00	1.6	309	16.5	-999	0	809	0.223272988	0.064	0.368	-999	1.41	0.605	4.64	2.05	4.18	1.04	2.25	0.33	0.29	1017.9	22.7	40.6
9/1/2014 15:00	2.2	294	16.7	-999	0	589	0.276212189	0.065	0.384	-999	1.51	0.449	5.14	2.15	3.91	0.81	2.45	0.3	0.44	1015.2	22.2	35.5
9/1/2014 16:00	3	300	16.5	-999	0	496	0.307959498	0.048	0.339	-999	1.53	0.692	5.38	2.01	4.04	1.01	2.57	0.39	0.52	1055.6	27.2	43.2
9/1/2014 17:00	1.8	308	16.2	-999	0	346	0.302201749	0.018	0.3	-999	1.52	0.451	5.74	2.23	4.3	1.09	2.65	0.43	0.31	1131.5	32.2	45.3
9/1/2014 18:00	1.5	306	14.8	-999	0	101	0.268174615	0.049	0.351	-999	1.54	0.418	5.25	2.23	4.44	1.31	2.77	0.43	0.29	1262.2	44.9	65.2
9/1/2014 19:00	1.7	325	13.3	-999	0	6	0.241758999	0.028	0.377	-999	1.57	0.303	5.56	2.3	4.38	0.96	2.98	0.46	0.42	1250.7	49.8	76.6
9/1/2014 20:00	1.7	320	12.9	-999	0	0	0.210019837	0.029	0.365	-999	1.47	0.43	5.87	2.25	4.4	1.14	3.11	0.48	0.46	1222.8	54.8	75.5
9/1/2014 21:00	0.6	336	10.1	-999	0	0	0.17600638	0.023	0.396	-999	1.62	0.484	6.34	2.54	4.97	1.31	3.62	0.53	0.52	1311.7	66.7	91.2
9/1/2014 22:00	0.9	300	6.2	-999	0	0	0.148124873	0.027	0.446	-999	1.6	0.442	5.21	2.2	5.19	1.85	3.75	0.63	0.95	-999	-999	-999
9/1/2014 23:00	1	302	5	-999	0	0	0.135434618	0.005	0.48	-999	1.58	0.384	5.5	2.07	5.43	1.33	5.07	1.09	1.65	-999	-999	-999
9/2/2014 0:00	0.7	313	4.4	-999	0	0	-999	-0.009	0.589	-999	1.71	0.584	4.64	2.69	6.72	1.76	7.08	1.7	2.37	-999	-999	-999
9/2/2014 1:00	0.9	308	3.8	-999	0	0	-999	0.009	0.506	-999	1.56	0.353	5.12	2.42	6.36	1.72	6.17	1.49	2.27	-999	-999	-999
9/2/2014 2:00	1	295	3.3	-999	0	0	0.083699643	-0.017	0.365	-999	1.59	0.334	5.07	2.37	5.99	1.8	5.54	1.4	1.9	-999	-999	-999
9/2/2014 3:00	0.8	297	2.5	-999	0	0	0.054295924	-0.002	0.426	-999	1.51	0.433	4.54	2.18	5.72	1.53	4.65	1.22	1.79	-999	-999	-999
9/2/2014 4:00	1	280	2.2	-999	0	0	0.040386781	-999	-999	-999	1.56	0.43	4.46	2.36	5.58	0.91	5.01	1.03	1.41	-999	-999	-999
9/2/2014 5:00	1	280	2.5	-999	0	0	0.026336526	0.046	0.471	-999	1.69	0.508	4.65	2.57	5.84	1.74	4.71	1.01	1.46	-999	-999	-999
9/2/2014 6:00	1	277	2.3	-999	0	5	0.022819681	-0.012	0.458	-999	1.59	0.465	4.7	2.3	5.17	1.46	3.56	0.86	1.3	-999	-999	-999
9/2/2014 7:00	0.9	314	3.4	-999	0	81	0.023406319	0.046	0.66	-999	-999	-999	-999	-999	-999	-999	-999	-999	-999	-999	-999	-999
9/2/2014 8:00	0.4	50	11.6	-999	0	357	0.000956962	0.16	0.877	-999	1.6	0.444	4.53	2.22	5.42	1.67	3.45	0.83	0.84	-999	-999	-999
9/2/2014 9:00	2.2	7	16.3	-999	0	555	-0.024822367	0.077	0.611	-999	1.58	0.468	4.82	2.23	5.16	1.02	3.86	0.55	0.7	1452.6	72.4	128.4
9/2/2014 10:00	2.7	10	17.7	-999	0	713	-0.019823377	0.102	0.572	-999	1.64	0.502	5.04	2.48	5.4	1.56	3.16	0.57	0.44	1397.5	69.5	116.2
9/2/2014 11:00	2.3	2	18.2	-999	0	813	0.082875817	0.236	0.685	-999	1.66	0.416	5.31	2.37	5.21	1.18	3.44	0.58	0.41	1297.1	59.8	93.7
9/2/2014 12:00	2.2	337	19.3	-999	0	859	0.200637021	0.156	0.588	-999	1.58	0.59	5.83	2.76	4.68	1.1	2.77	0.47	0.39	1169.4	41.9	67.1
9/2/2014 13:00	2.7	323	19.9	-999	0	858	0.272857485	0.08	0.362	-999	1.56	0.486	5.85	2.3	4.4	1.04	2.81	0.45	0.43	1028.9	27.2	44.4
9/2/2014 14:00	1.9	320	20.6	-999	0	814	0.289217157	0.011	0.253	-999	1.52	0.515	5.58	2.16	4.34	1.23	2.28	0.4	0.29	970.4	29.7	51.5
9/2/2014 15:00	1.8	330	21	-999	0	725	0.318270704	0.008	0.294	-999	1.5	0.526	5.32	1.93	4.3	1.06	2.51	0.43	0.28	965.4	25	48.6
9/2/2014 16:00	1.1	247	20.9	-999	0	542	0.324752549	0.021	0.308	-999	1.6	0.555	5.87	2.3	4.51	1.09	2.85	0.46	0.27	973.3	23.4	43.3
9/2/2014 17:00	0.4	277	20.5	-999	0	345	0.343591887	0.016	0.321	-999	-999	-999	-999	-999	-999	-999	-999	-999	-999	-999	-999	-999
9/2/2014 18:00	0.5	330	19	-999	0	98	0.3010146	-999	-999	-999	1.53	0.578	6.2	2.22	4.45	1.35	2.58	0.47	0.36	994.1	26	42.7
9/2/2014 19:00	0.1	53	15.6	-999	0	6	0.252617489	-0.047	0.414	-999	1.58	0.573	6.25	2.3	4.44	1.01	2.83	0.46	0.3	1072.4	30.8	49.9
9/2/2014 20:00	1.1	280	11.9	-999	0	0	0.210707713	0.002	0.605	-999	1.47	0.495	5.08	2.07	4.47	0.87	2.21	0.55	0.48	-999	-999	-999
9/2/2014 21:00	0.9	321	10.4	-999	0	0	0.182182414	0.021	0.409	-999	1.49	0.458	4.54	2.14	4.71	1.22	2.91	0.62	0.66	-999	-999	-999
9/2/2014 22:00	1.1	299	9.8	-999	0	0	0.155967161	0.029	0.341	-999	1.675	0.5855	5.68	2.15	4.725	1.225	3.295	0.62	0.805	-999	-999	-999
9/2/2014 23:00	0.8	295	8.7	-999	0	0	0.119895816	0.003	0.249	-999	1.56	0.58	5.45	1.95	4.36	0.75	2.71	0.55	0.74	-999	-999	-999
9/3/2014 0:00	1.6	333	12.8	-999	0	0	-999	-0.014	0.234	-999	1.66	0.544	6.02	1.94	4	1.1	2.46	0.48	0.5	-999	-999	-999
9/3/2014 1:00	1.5	350	12	-999	0	0	-999	0.014	0.348	-999	1.55	0.592	5.52	1.8	4.23	0.97	2.54	0.39	0.53	-999	-999	-999
9/3/2014 2:00	1.4	343	11.1	-999	0	0	0.084150589	-0.005	0.313	-999	-999	-999	-999	-999	-999	-999	-999	-999	-999	-999	-999	-999
9/3/2014 3:00	1.5	283	9.6	-999	0	0	0.062223112	0.021	0.268	-999	1.66	0.527	5.34	2.26	4.53	2.26	2.84	0.6	0.54	1067.2	42.2	51.2
9/3/2014 4:00	1	296	7.8	-999	0	0	0.041384859	0.019	0.287	-999	1.58	0.68	6.39	2.18	4.59	1.41	2.6	0.64	0.62	-999	-999	-999
9/3/2014 5:00	1.1	285	6.7	-999	0	0	0.046866412	0.012	0.319	-999	1.66	0.782	6.11	2.05	4.48	0.98	3.32	0.67	0.82	-999	-999	-999
9/3/2014 6:00	0.8	297	7.2	-999	0	5	0.034875569	0	0.317	-999	1.64	0.682	6.14	2.12	4.36	1.07	2.83	0.56	0.83	-999	-999	-999
9/3/2014 7:00	0.9	286	9.3	-999	0	65	0.014949264	0.066	0.582	-999	1.68	0.971	6.8	2.21	4.69	1.26	2.6	0.58	0.53	-999	-999	-999
9/3/2014 8:00	2.2	29	16.7	-999	0	374	-0.001059803	0.239	1.17	-999	1.5	0.92	6.16	2.01	4.47	1.2	2.43	0.46	0.53	-999	-999	-999
9/3/2014 9:00	3.6	36	19.5	-999	0	531	-0.012653231	0.168	0.62	-999	1.49	1.33	6.77	2.04	3.66	0.97	2.4	0.64	0.59	715.7	36.6	51.7
9/3/2014 10:00	2.2	25	20.5	-999	0	677	-0.023614188	0.079	0.412	-999	1.37	1.093	6.62	1.86	3.32	0.97	1.52	0.37	0.38	-999	-999	-999
9/3/2014 11:00	0.5	172	20.7	-999	0	792	-0.010335239	0.052	0.312	-999	1.25	1.003	6.43	1.66	3.12	0.78	1.49	0.39	0.24	564	21.9	35.6
9/3/2014 12:00	0.3	203	20.9	-999	0	819	0.061890858	0.031	0.3	-999	-999	-999	-999	-999	-999	-999	-999	-999	-999	-999	-999	-999
9/3/2014 13:00	0.4	332	21.9	-999	0	880	0.14475193	0.047	0.326	-999	1.38	1.1675	7.9	1.885	3.45	0.775	1.765	0.305	0.38	609.15	23.75	27.4
9/3/2014 14:00	1.9	263	22.4	-999	0	822	0.211286772	0.041	0.293	-999	1.28	0.787	7.41	1.87	2.92	0.96	1.36	0.17	0.08	560	19.9	30.1
9/3/2014 15:00	0.4	198	22.6	-999	0	724	0.274865893	0.058	0.354	-999	1.34	0.828	5.97	1.59	2.91	0.75	1.27	0.33	0.13	639.3	36.6	46.4
9/3/2014 16:00	1.5	262	22.5	-999	0	535	0.282468721	0.025	0.317	-999	1.35	0.783	6.63	1.66	3.18	0.97	1.89	0.34	0.25	858.9	43.8	58.3
9/3/2014 17:00	2.4	271	21.8	-999	0	344	0.291659658	0.049	0.364	-999	1.51	0.793	8.56	1.88	4.04	1.19	3.06	0.42	0.34	1369	84.4	94.3
9/3/2014 18:00	0.3	296	19.6	-999	0	92	0.260859155	0.029	0.454	-999	1.36	0.768	6.64	1.56	3.8	0.75	2.59	0.56	0.43	1267.8	77.1	94.3
9/3/2014 19:00	0.6	303	14.2	-999	0	4	0.21652872	0.014	0.568	-999	1.34	0.761	7.88	1.69	3.67	1.13	2.44	0.77	0.89	-999	-999	-999
9/3/2014 20:00	1.1	279	12.1	-999	0	0	0.185411031	0.003	0.566	-999	1.33	0.814	8.25	1.64	3.81	1.11	2.59	0.68	0.58	-999	-999	-999
9/3/2014 21:00	0.9	286	10.7	-999	0	0	0.153895061	0.039	0.336	-999	-999	-999	-999	-999	-999	-999	-999	-999	-999	-999	-999	-999
9/3/2014 22:00	1.1	271	10.2	-999	0	0	0.138716718	0.007	0.297	-999	1.32	0.87	7.62	1.61	2.82	1.89	1.2	0.34	0.31	-999	-999	-999
9/3/2014 23:00	1.2	279	8.9	-999	0	0	0.108255044	0.03	0.289	-999	1.23	1.263	8.34	1.6	3.33	0.94	1.82	0.32	0.27	-999	-999	-999
9/4/2014 0:00	0.7	300	8.9	-999	0	0	-999	0.039	0.299	-999	1.22	1	7.43	1.37	3	0.66	2.15	0.26	0.51	-999	-999	-999
9/4/2014 1:00	1	279	8.6	-999	0	0	-999	0.021	0.346	-999	-999	-999	-999	-999	-999	-999	-999	-999	-999	-999	-999	-999
9/4/2014 2:00	1.5	350	13.6	-999	0	0	0.049224432	0	0.277	-999	-999	-999	-999	-999	-999	-999	-999	-999	-999	-999	-999	-999
9/4/2014 3:00	1.7	336	14.3	-999	0	0	0.007999874	0.015	0.256	-999	-999	-999	-999	-999	-999	-999	-999	-999	-999	-999	-999	-999
9/4/2014 4:00	1.5	347	14.6	-999	0	0	-0.002828112	-999	-999	-999	-999	-999	-999	-999	-999	-999	-999	-999	-999	-999	-999	-999
9/4/2014 5:00	0.6	3	13.9	-999	0	0	-0.020526948	-0.007	0.194	-999	-999	-999	-999	-999	-999	-999	-999	-999	-999	-999	-999	-999
9/4/2014 6:00	1	269	8.8	-999	0	4	-0.033235601	-0.002	0.526	-999	-999	-999	-999	-999	-999	-999	-999	-999	-999	-999	-999	-999
9/4/2014 7:00	0.7	228	7.5	-999	0	70	-0.038936124	-999	-999	-999	-999	-999	-999	-999	-999	-999	-999	-999	-999	-999	-999	-999
9/4/2014 8:00	1.6	161	14.7	-999	0	352	-0.033733348	0.517	2.633	-999	-999	-999	-999	-999	-999	-999	-999	-999	-999	-999	-999	-999
9/4/2014 9:00	1.7	151	15.9	-999	0	520	-0.057717421	0.584	3.115	-999	-999	-999	-999	-999	-999	-999	-999	-999	-999	-999	-999	-999
9/4/2014 10:00	2.6	167	15.8	-999	0	693	-0.070068545	0.744	3.894	-999	-999	-999	-999	-999	-999	-999	-999	-999	-999	-999	-999	-999
9/4/2014 11:00	2.6	149	15.2	-999	0	624	-0.077066457	0.555	3.95	-999	-999	-999	-999	-999	-999	-999	-999	-999	-999	-999	-999	-999
9/4/2014 12:00	2	152	14.7	-999	0	615	-0.066461228	0.196	2.318	-999	-999	-999	-999	-999	-999	-999	-999	-999	-999	-999	-999	-999
9/4/2014 13:00	2.3	161	16.3	-999	0	657	-0.051689742	0.164	2.224	-999	-999	-999	-999	-999	-999	-999	-999	-999	-999	-999	-999	-999
9/4/2014 14:00	2.9	147	13.9	-999	0	322	-0.050057311	0.132	2.768	-999	-999	-999	-999	-999	-999	-999	-999	-999	-999	-999	-999	-999
9/4/2014 15:00	0.8	163	12.5	-999	0	139	-0.019414119	0.132	3.718	-999	-999	-999	-999	-999	-999	-999	-999	-999	-999	-999	-999	-999
9/4/2014 16:00	0.8	322	14.5	-999	0	135	-0.014900247	0.065	1.26	-999	-999	-999	-999	-999	-999	-999	-999	-999	-999	-999	-999	-999
9/4/2014 17:00	1.8	344	13.7	-999	0	92	-0.011642656	0.079	0.719	-999	-999	-999	-999	-999	-999	-999	-999	-999	-999	-999	-999	-999
9/4/2014 18:00	0.3	357	12.2	-999	0	27	-0.012505685	0.028	0.823	-999	-999	-999	-999	-999	-999	-999	-999	-999	-999	-999	-999	-999
9/4/2014 19:00	2	208	9.1	-999	0.8	0	0.000732461	0.015	3.654	-999	-999	-999	-999	-999	-999	-999	-999	-999	-999	-999	-999	-999
9/4/2014 20:00	0.5	174	7.3	-999	1.3	0	0.015836506	0.041	3.322	-999	-999	-999	-999	-999	-999	-999	-999	-999	-999	-999	-999	-999
9/4/2014 21:00	0.5	237	7.1	-999	0	0	0.056250762	0.024	3.48	-999	-999	-999	-999	-999	-999	-999	-999	-999	-999	-999	-999	-999
9/4/2014 22:00	0.2	236	7.2	-999	0.2	0	0.084418409	0.019	3.777	-999	-999	-999	-999	-999	-999	-999	-999	-999	-999	-999	-999	-999
9/4/2014 23:00	1.3	203	7.1	-999	0.1	0	0.124353119	0.003	3.66	-999	-999	-999	-999	-999	-999	-999	-999	-999	-999	-999	-999	-999
9/5/2014 0:00	0.9	203	6.7	-999	0.1	0	-999	-0.015	3.282	-999	-999	-999	-999	-999	-999	-999	-999	-999	-999	-999	-999	-999
9/5/2014 1:00	0.8	187	6.6	-999	2.3	0	-999	0.003	3.428	-999	-999	-999	-999	-999	-999	-999	-999	-999	-999	-999	-999	-999
9/5/2014 2:00	1.8	201	5.8	-999	0.2	0	0.103471621	0.017	0.929	-999	-999	-999	-999	-999	-999	-999	-999	-999	-999	-999	-999	-999
9/5/2014 3:00	1.3	162	5.5	-999	0.1	0	0.050830435	0.016	0.774	-999	-999	-999	-999	-999	-999	-999	-999	-999	-999	-999	-999	-999
9/5/2014 4:00	0.9	159	5.4	-999	0.2	0	0.012139259	0.004	0.859	-999	-999	-999	-999	-999	-999	-999	-999	-999	-999	-999	-999	-999
9/5/2014 5:00	1.2	146	5.4	-999	0.1	0	-0.00256055	-0.034	0.559	-999	-999	-999	-999	-999	-999	-999	-999	-999	-999	-999	-999	-999
9/5/2014 6:00	1.1	147	5.4	-999	0	2	-0.002634634	-0.006	0.752	-999	-999	-999	-999	-999	-999	-999	-999	-999	-999	-999	-999	-999
9/5/2014 7:00	1.7	157	5.4	-999	0	31	-0.036831759	0.074	0.899	-999	-999	-999	-999	-999	-999	-999	-999	-999	-999	-999	-999	-999
9/5/2014 8:00	1.6	151	5.6	-999	0	131	-0.037527763	0.171	1.118	-999	-999	-999	-999	-999	-999	-999	-999	-999	-999	-999	-999	-999
9/5/2014 9:00	0.9	147	6	-999	0	268	-0.049287458	0.381	1.435	-999	-999	-999	-999	-999	-999	-999	-999	-999	-999	-999	-999	-999
9/5/2014 10:00	1.2	119	7	-999	0	369	-0.071354299	0.475	1.542	-999	-999	-999	-999	-999	-999	-999	-999	-999	-999	-999	-999	-999
9/5/2014 11:00	1.7	130	7.7	-999	0	344	-0.072407036	0.569	1.766	-999	-999	-999	-999	-999	-999	-999	-999	-999	-999	-999	-999	-999
9/5/2014 12:00	1.8	134	7.9	-999	0	382	-0.078958276	0.739	2.196	-999	-999	-999	-999	-999	-999	-999	-999	-999	-999	-999	-999	-999
9/5/2014 13:00	0.6	97	7.8	-999	1.4	84	-0.082459982	0.371	2.448	-999	-999	-999	-999	-999	-999	-999	-999	-999	-999	-999	-999	-999
9/5/2014 14:00	2.2	150	7.3	-999	0.1	151	-0.071182316	0.951	3.783	-999	-999	-999	-999	-999	-999	-999	-999	-999	-999	-999	-999	-999
9/5/2014 15:00	0.4	140	8	-999	1	119	-0.090260322	0.488	3.046	-999	-999	-999	-999	-999	-999	-999	-999	-999	-999	-999	-999	-999
9/5/2014 16:00	0.2	331	8.5	-999	0	76	-0.096552549	0.332	2.617	-999	-999	-999	-999	-999	-999	-999	-999	-999	-999	-999	-999	-999
9/5/2014 17:00	1.6	10	8.5	-999	0	83	-0.096036628	0.353	2.818	-999	-999	-999	-999	-999	-999	-999	-999	-999	-999	-999	-999	-999
9/5/2014 18:00	1	150	8	-999	0.5	42	-0.09266429	0.159	2.451	-999	-999	-999	-999	-999	-999	-999	-999	-999	-999	-999	-999	-999
9/5/2014 19:00	1.7	162	7.2	-999	0	2	-0.097111928	0.053	2.153	-999	-999	-999	-999	-999	-999	-999	-999	-999	-999	-999	-999	-999
9/5/2014 20:00	1.5	158	6.8	-999	0	0	-0.096468077	-0.006	1.651	-999	-999	-999	-999	-999	-999	-999	-999	-999	-999	-999	-999	-999
9/5/2014 21:00	0.7	172	6.7	-999	0	0	-0.071562743	-0.008	1.391	-999	-999	-999	-999	-999	-999	-999	-999	-999	-999	-999	-999	-999
9/5/2014 22:00	0.6	342	6.9	-999	0	0	-0.057222384	0.012	1.493	-999	-999	-999	-999	-999	-999	-999	-999	-999	-999	-999	-999	-999
9/5/2014 23:00	0.9	330	6.2	-999	0	0	-0.044581157	0.002	1.257	-999	-999	-999	-999	-999	-999	-999	-999	-999	-999	-999	-999	-999
9/6/2014 0:00	1	318	5.7	-999	0	0	-999	0	0.827	-999	-999	-999	-999	-999	-999	-999	-999	-999	-999	-999	-999	-999
9/6/2014 1:00	0.7	281	4.6	-999	0	0	-999	0.003	0.436	-999	-999	-999	-999	-999	-999	-999	-999	-999	-999	-999	-999	-999
9/6/2014 2:00	1	317	3.8	-999	0	0	0.03250738	0.02	0.38	-999	-999	-999	-999	-999	-999	-999	-999	-999	-999	-999	-999	-999
9/6/2014 3:00	1	299	3.3	-999	0	0	-0.010311421	-0.003	0.305	-999	-999	-999	-999	-999	-999	-999	-999	-999	-999	-999	-999	-999
9/6/2014 4:00	1.5	315	3.5	-999	0	0	-0.029125143	-999	-999	-999	-999	-999	-999	-999	-999	-999	-999	-999	-999	-999	-999	-999
9/6/2014 5:00	1.1	310	3.8	-999	0	0	-0.041222785	-0.009	0.348	-999	-999	-999	-999	-999	-999	-999	-999	-999	-999	-999	-999	-999
9/6/2014 6:00	1.1	306	2.8	-999	0	4	-0.054518142	0.029	0.434	-999	-999	-999	-999	-999	-999	-999	-999	-999	-999	-999	-999	-999
9/6/2014 7:00	0.7	315	3.3	-999	0	69	-0.058651029	0.089	0.511	-999	-999	-999	-999	-999	-999	-999	-999	-999	-999	-999	-999	-999
9/6/2014 8:00	0.3	77	8.3	-999	0	338	-0.071404365	0.325	1.094	-999	-999	-999	-999	-999	-999	-999	-999	-999	-999	-999	-999	-999
9/6/2014 9:00	1.1	127	11	-999	0	516	-0.078220814	0.086	0.794	-999	-999	-999	-999	-999	-999	-999	-999	-999	-999	-999	-999	-999
9/6/2014 10:00	1.3	142	12.7	-999	0	683	-0.086031327	0.044	0.609	-999	-999	-999	-999	-999	-999	-999	-999	-999	-999	-999	-999	-999
9/6/2014 11:00	2	150	13.9	-999	0	858	-0.020077206	0.06	0.706	-999	-999	-999	-999	-999	-999	-999	-999	-999	-999	-999	-999	-999
9/6/2014 12:00	2.8	155	14.1	-999	0	694	0.200159229	0.216	1.313	-999	-999	-999	-999	-999	-999	-999	-999	-999	-999	-999	-999	-999
9/6/2014 13:00	2.7	152	13.4	-999	0	427	0.379695186	0.219	1.799	-999	-999	-999	-999	-999	-999	-999	-999	-999	-999	-999	-999	-999
9/6/2014 14:00	1.9	152	14.8	-999	0	686	0.452039146	0.15	1.492	-999	-999	-999	-999	-999	-999	-999	-999	-999	-999	-999	-999	-999
9/6/2014 15:00	2.6	159	14	-999	0	404	0.466140498	0.087	1.446	-999	-999	-999	-999	-999	-999	-999	-999	-999	-999	-999	-999	-999
9/6/2014 16:00	2.1	157	12.6	-999	0	183	0.523317845	0.089	1.31	-999	-999	-999	-999	-999	-999	-999	-999	-999	-999	-999	-999	-999
9/6/2014 17:00	1.6	157	12.5	-999	0	181	0.502983247	0.125	1.911	-999	-999	-999	-999	-999	-999	-999	-999	-999	-999	-999	-999	-999
9/6/2014 18:00	1.6	169	11.4	-999	0	45	0.463729234	0.011	2.317	-999	-999	-999	-999	-999	-999	-999	-999	-999	-999	-999	-999	-999
9/6/2014 19:00	0.9	193	9.7	-999	0	3	0.459296318	0.04	3.757	-999	-999	-999	-999	-999	-999	-999	-999	-999	-999	-999	-999	-999
9/6/2014 20:00	0.9	249	7.5	-999	0	0	0.427884476	0.021	2.879	-999	-999	-999	-999	-999	-999	-999	-999	-999	-999	-999	-999	-999
9/6/2014 21:00	0.9	301	6.3	-999	0	0	0.391437723	-0.022	1.315	-999	-999	-999	-999	-999	-999	-999	-999	-999	-999	-999	-999	-999
9/6/2014 22:00	1.5	297	6.3	-999	0	0	0.336697508	0.012	0.752	-999	-999	-999	-999	-999	-999	-999	-999	-999	-999	-999	-999	-999
9/6/2014 23:00	1.8	297	5.9	-999	0	0	0.282392454	-0.008	0.55	-999	-999	-999	-999	-999	-999	-999	-999	-999	-999	-999	-999	-999
9/7/2014 0:00	1.7	296	6.3	-999	0	0	-999	0.004	0.504	-999	-999	-999	-999	-999	-999	-999	-999	-999	-999	-999	-999	-999
9/7/2014 1:00	1.6	305	5.8	-999	0	0	-999	-0.002	0.399	-999	-999	-999	-999	-999	-999	-999	-999	-999	-999	-999	-999	-999
9/7/2014 2:00	1.2	309	5.4	-999	0	0	0.142779667	0.011	0.47	-999	-999	-999	-999	-999	-999	-999	-999	-999	-999	-999	-999	-999
9/7/2014 3:00	1.6	314	5.4	-999	0	0	0.076236791	0.027	0.851	-999	-999	-999	-999	-999	-999	-999	-999	-999	-999	-999	-999	-999
9/7/2014 4:00	0.9	315	4.6	-999	0	0	0.054834556	0.047	0.961	-999	-999	-999	-999	-999	-999	-999	-999	-999	-999	-999	-999	-999
9/7/2014 5:00	1.1	295	3.9	-999	0	0	0.024279389	0.012	0.68	-999	-999	-999	-999	-999	-999	-999	-999	-999	-999	-999	-999	-999
9/7/2014 6:00	0.6	279	3.9	-999	0	4	0.018647628	0.009	0.523	-999	-999	-999	-999	-999	-999	-999	-999	-999	-999	-999	-999	-999
9/7/2014 7:00	0.6	307	4.8	-999	0	64	-0.001206948	0.108	0.649	-999	-999	-999	-999	-999	-999	-999	-999	-999	-999	-999	-999	-999
9/7/2014 8:00	0.7	23	12.3	-999	0	334	-0.021001474	0.185	0.962	-999	-999	-999	-999	-999	-999	-999	-999	-999	-999	-999	-999	-999
9/7/2014 9:00	1.3	345	16	-999	0	476	-0.032429402	0.029	0.388	-999	-999	-999	-999	-999	-999	-999	-999	-999	-999	-999	-999	-999
9/7/2014 10:00	2.3	341	15.8	-999	0	524	0.044616837	0.038	0.421	-999	-999	-999	-999	-999	-999	-999	-999	-999	-999	-999	-999	-999
9/7/2014 11:00	1.9	269	13.3	-999	0	157	0.159083924	0.038	0.289	-999	-999	-999	-999	-999	-999	-999	-999	-999	-999	-999	-999	-999
9/7/2014 12:00	1.8	353	15.7	-999	0	753	0.243821377	0.048	0.314	-999	-999	-999	-999	-999	-999	-999	-999	-999	-999	-999	-999	-999
9/7/2014 13:00	2.5	304	15.8	-999	0	419	0.243601865	0.042	0.248	-999	-999	-999	-999	-999	-999	-999	-999	-999	-999	-999	-999	-999
9/7/2014 14:00	1.1	312	16.8	-999	0	770	0.290299896	0.01	0.243	-999	-999	-999	-999	-999	-999	-999	-999	-999	-999	-999	-999	-999
9/7/2014 15:00	1.5	346	15.7	-999	0.5	425	0.26607176	0.051	0.297	-999	-999	-999	-999	-999	-999	-999	-999	-999	-999	-999	-999	-999
9/7/2014 16:00	1.1	291	16.4	-999	0	196	0.295981737	0.002	0.224	-999	-999	-999	-999	-999	-999	-999	-999	-999	-999	-999	-999	-999
9/7/2014 17:00	1.8	274	16.2	-999	0	257	0.283189316	-0.002	0.191	-999	-999	-999	-999	-999	-999	-999	-999	-999	-999	-999	-999	-999
9/7/2014 18:00	1.5	308	13.8	-999	0	65	0.259763591	0.06	0.382	-999	-999	-999	-999	-999	-999	-999	-999	-999	-999	-999	-999	-999
9/7/2014 19:00	1.4	309	11.1	-999	0	3	0.236927557	0.034	0.229	-999	-999	-999	-999	-999	-999	-999	-999	-999	-999	-999	-999	-999
9/7/2014 20:00	1.3	309	9.7	-999	0	0	0.197099009	0.045	0.254	-999	-999	-999	-999	-999	-999	-999	-999	-999	-999	-999	-999	-999
9/7/2014 21:00	1	296	9.6	-999	0	0	0.176718849	0.016	0.261	-999	-999	-999	-999	-999	-999	-999	-999	-999	-999	-999	-999	-999
9/7/2014 22:00	1	291	7.4	-999	0	0	0.1350099	0.026	0.197	-999	-999	-999	-999	-999	-999	-999	-999	-999	-999	-999	-999	-999
9/7/2014 23:00	0.8	293	5.8	-999	0	0	0.11078469	0.024	0.244	-999	-999	-999	-999	-999	-999	-999	-999	-999	-999	-999	-999	-999
9/8/2014 0:00	1	311	7.9	-999	0	0	-999	-0.006	0.274	-999	-999	-999	-999	-999	-999	-999	-999	-999	-999	-999	-999	-999
9/8/2014 1:00	0.7	311	9	-999	0	0	-999	0.028	0.363	-999	-999	-999	-999	-999	-999	-999	-999	-999	-999	-999	-999	-999
9/8/2014 2:00	1.1	286	10	-999	0	0	0.075712368	0.024	0.372	-999	-999	-999	-999	-999	-999	-999	-999	-999	-999	-999	-999	-999
9/8/2014 3:00	1.7	311	11.9	-999	0	0	0.035060381	0.018	0.303	-999	-999	-999	-999	-999	-999	-999	-999	-999	-999	-999	-999	-999
9/8/2014 4:00	0.8	329	8.5	-999	0	0	0.011351063	-999	-999	-999	-999	-999	-999	-999	-999	-999	-999	-999	-999	-999	-999	-999
9/8/2014 5:00	0.6	272	8.5	-999	0	0	0.007617718	0.019	0.378	-999	-999	-999	-999	-999	-999	-999	-999	-999	-999	-999	-999	-999
9/8/2014 6:00	1	326	9.2	-999	0	4	-0.011442139	-0.029	0.365	-999	-999	-999	-999	-999	-999	-999	-999	-999	-999	-999	-999	-999
9/8/2014 7:00	0.5	308	10.6	-999	0	71	-0.020424483	-999	-999	-999	-999	-999	-999	-999	-999	-999	-999	-999	-999	-999	-999	-999
9/8/2014 8:00	1.3	21	13.7	-999	0	263	-0.036627668	0.163	0.853	-999	-999	-999	-999	-999	-999	-999	-999	-999	-999	-999	-999	-999
9/8/2014 9:00	1.2	337	14.9	-999	0	330	-0.04803828	0.053	0.445	-999	-999	-999	-999	-999	-999	-999	-999	-999	-999	-999	-999	-999
9/8/2014 10:00	1.7	337	15.7	-999	0	491	-0.060089855	0.095	0.494	-999	-999	-999	-999	-999	-999	-999	-999	-999	-999	-999	-999	-999
9/8/2014 11:00	1.8	256	16.2	-999	0	270	-999	0.049	0.401	-999	-999	-999	-999	-999	-999	-999	-999	-999	-999	-999	-999	-999
9/8/2014 12:00	0.8	331	14.9	-999	0	112	-999	0.062	0.446	-999	-999	-999	-999	-999	-999	-999	-999	-999	-999	-999	-999	-999
9/8/2014 13:00	2.7	19	13.8	-999	0	93	-999	0.262	1.151	-999	-999	-999	-999	-999	-999	-999	-999	-999	-999	-999	-999	-999
9/8/2014 14:00	1.2	29	14.6	-999	0	431	-999	0.152	0.755	-999	-999	-999	-999	-999	-999	-999	-999	-999	-999	-999	-999	-999
9/8/2014 15:00	0.4	146	18.1	-999	0	775	-999	0.048	0.423	-999	-999	-999	-999	-999	-999	-999	-999	-999	-999	-999	-999	-999
9/8/2014 16:00	0.6	296	16	-999	0	127	-999	0.045	0.471	-999	-999	-999	-999	-999	-999	-999	-999	-999	-999	-999	-999	-999
9/8/2014 17:00	1.3	11	13.7	-999	0	76	-999	0.042	0.328	-999	-999	-999	-999	-999	-999	-999	-999	-999	-999	-999	-999	-999
9/8/2014 18:00	0.8	212	11.9	-999	0	18	-999	0.048	1.135	-999	-999	-999	-999	-999	-999	-999	-999	-999	-999	-999	-999	-999
9/8/2014 19:00	0.8	285	10.6	-999	0	2	-999	0.027	1.308	-999	-999	-999	-999	-999	-999	-999	-999	-999	-999	-999	-999	-999
9/8/2014 20:00	0.6	341	9.7	-999	0	0	-999	0.023	0.962	-999	-999	-999	-999	-999	-999	-999	-999	-999	-999	-999	-999	-999
9/8/2014 21:00	0.8	302	9.9	-999	0	0	-999	0.038	0.566	-999	-999	-999	-999	-999	-999	-999	-999	-999	-999	-999	-999	-999
9/8/2014 22:00	0.8	279	10	-999	0.2	0	-999	0.025	0.253	-999	-999	-999	-999	-999	-999	-999	-999	-999	-999	-999	-999	-999
9/8/2014 23:00	1.1	298	9.4	-999	0	0	-999	0.031	0.278	-999	-999	-999	-999	-999	-999	-999	-999	-999	-999	-999	-999	-999
9/9/2014 0:00	0.9	317	9.9	-999	0	0	-999	0.007	0.14	-999	-999	-999	-999	-999	-999	-999	-999	-999	-999	-999	-999	-999
9/9/2014 1:00	0.3	271	10.6	-999	0	0	-999	0.015	0.135	-999	-999	-999	-999	-999	-999	-999	-999	-999	-999	-999	-999	-999
9/9/2014 2:00	0.4	320	10.1	-999	0	0	-999	0.03	0.168	-999	-999	-999	-999	-999	-999	-999	-999	-999	-999	-999	-999	-999
9/9/2014 3:00	0.6	317	10.2	-999	0	0	-999	0.046	0.217	-999	-999	-999	-999	-999	-999	-999	-999	-999	-999	-999	-999	-999
9/9/2014 4:00	0.3	252	10.6	-999	0	0	-999	0.009	0.141	-999	-999	-999	-999	-999	-999	-999	-999	-999	-999	-999	-999	-999
9/9/2014 5:00	0.5	176	10.4	-999	0	0	-999	0.015	0.079	-999	-999	-999	-999	-999	-999	-999	-999	-999	-999	-999	-999	-999
9/9/2014 6:00	0.6	2	9.7	-999	0	1	-999	0.009	0.146	-999	-999	-999	-999	-999	-999	-999	-999	-999	-999	-999	-999	-999
9/9/2014 7:00	1.8	28	9.9	-999	0	23	-999	0.04	0.194	-999	-999	-999	-999	-999	-999	-999	-999	-999	-999	-999	-999	-999
9/9/2014 8:00	2.6	27	11.1	-999	0	114	-999	0.111	0.458	-999	-999	-999	-999	-999	-999	-999	-999	-999	-999	-999	-999	-999
9/9/2014 9:00	1.6	25	11.6	-999	0	101	-999	0.188	0.805	-999	-999	-999	-999	-999	-999	-999	-999	-999	-999	-999	-999	-999
9/9/2014 10:00	1.4	46	13.4	59	0	127	-999	0.147	0.683	-999	-999	-999	-999	-999	-999	-999	-999	-999	-999	-999	-999	-999
9/9/2014 11:00	2	51	13.8	60	0	122	-999	0.098	0.523	-999	-999	-999	-999	-999	-999	-999	-999	-999	-999	-999	-999	-999
9/9/2014 12:00	1.6	6	10.5	84	2.2	89	-999	0.089	0.296	-999	-999	-999	-999	-999	-999	-999	-999	-999	-999	-999	-999	-999
9/9/2014 13:00	0.9	336	10.5	83	0.6	314	-999	0.136	0.382	-999	-999	-999	-999	-999	-999	-999	-999	-999	-999	-999	-999	-999
9/9/2014 14:00	2.6	23	12.1	72	0	389	-999	0.105	0.277	-999	-999	-999	-999	-999	-999	-999	-999	-999	-999	-999	-999	-999
9/9/2014 15:00	0.4	252	12.2	68	0	236	-999	0.056	0.249	-999	-999	-999	-999	-999	-999	-999	-999	-999	-999	-999	-999	-999
9/9/2014 16:00	0.5	272	12.6	67	0	212	-999	0.022	0.21	-999	-999	-999	-999	-999	-999	-999	-999	-999	-999	-999	-999	-999
9/9/2014 17:00	1.3	130	12.6	66	0	172	-999	0.037	0.234	-999	-999	-999	-999	-999	-999	-999	-999	-999	-999	-999	-999	-999
9/9/2014 18:00	1.4	207	10.2	84	0.1	22	-999	0.02	0.949	-999	-999	-999	-999	-999	-999	-999	-999	-999	-999	-999	-999	-999
9/9/2014 19:00	0.5	211	8.9	93	2.1	1	-999	0.028	1.122	-999	-999	-999	-999	-999	-999	-999	-999	-999	-999	-999	-999	-999
9/9/2014 20:00	0.6	359	8.3	93	0	0	-999	0.018	0.622	-999	-999	-999	-999	-999	-999	-999	-999	-999	-999	-999	-999	-999
9/9/2014 21:00	0.2	310	7.3	95	0	0	-999	0.034	0.286	-999	-999	-999	-999	-999	-999	-999	-999	-999	-999	-999	-999	-999
9/9/2014 22:00	0.6	302	7	93	0	0	-999	0.025	0.262	-999	-999	-999	-999	-999	-999	-999	-999	-999	-999	-999	-999	-999
9/9/2014 23:00	0.2	242	6.7	96	0	0	-999	0.012	0.314	-999	-999	-999	-999	-999	-999	-999	-999	-999	-999	-999	-999	-999
9/10/2014 0:00	0.4	343	7	95	0.2	0	-999	0.011	0.293	-999	-999	-999	-999	-999	-999	-999	-999	-999	-999	-999	-999	-999
9/10/2014 1:00	1.4	6	6	92	0.6	0	-999	0.019	0.125	-999	-999	-999	-999	-999	-999	-999	-999	-999	-999	-999	-999	-999
9/10/2014 2:00	0.4	276	5.5	94	0.2	0	-999	-0.024	0.031	-999	-999	-999	-999	-999	-999	-999	-999	-999	-999	-999	-999	-999
9/10/2014 3:00	0.5	307	5.1	96	0.1	0	-999	-0.003	0.122	-999	-999	-999	-999	-999	-999	-999	-999	-999	-999	-999	-999	-999
9/10/2014 4:00	1.1	347	5.2	93	0.5	0	-999	-999	-999	-999	-999	-999	-999	-999	-999	-999	-999	-999	-999	-999	-999	-999
9/10/2014 5:00	0.5	250	4.9	93	0	0	-999	0.022	0.111	-999	-999	-999	-999	-999	-999	-999	-999	-999	-999	-999	-999	-999
9/10/2014 6:00	0.4	303	4.6	96	0	5	-999	0.027	0.354	-999	-999	-999	-999	-999	-999	-999	-999	-999	-999	-999	-999	-999
9/10/2014 7:00	0.1	313	4.2	96	0	65	-999	0.076	0.384	-999	-999	-999	-999	-999	-999	-999	-999	-999	-999	-999	-999	-999
9/10/2014 8:00	1.2	135	5.8	93	0	284	-999	0.304	1.105	-999	-999	-999	-999	-999	-999	-999	-999	-999	-999	-999	-999	-999
9/10/2014 9:00	0.9	302	8.8	67	0	457	-999	0.146	0.505	-999	-999	-999	-999	-999	-999	-999	-999	-999	-999	-999	-999	-999
9/10/2014 10:00	2.4	324	10.9	51	0	667	-999	0.114	0.376	-999	-999	-999	-999	-999	-999	-999	-999	-999	-999	-999	-999	-999
9/10/2014 11:00	2.8	291	11.8	46	0	709	-999	0.06	0.333	-999	-999	-999	-999	-999	-999	-999	-999	-999	-999	-999	-999	-999
9/10/2014 12:00	1.8	331	12.5	46	0	721	-999	0.095	0.341	-999	-999	-999	-999	-999	-999	-999	-999	-999	-999	-999	-999	-999
9/10/2014 13:00	2.4	306	13.6	40	0	831	-999	0.292	0.757	-999	-999	-999	-999	-999	-999	-999	-999	-999	-999	-999	-999	-999
9/10/2014 14:00	2.1	320	14.5	37	0	872	-999	0.085	0.262	-999	-999	-999	-999	-999	-999	-999	-999	-999	-999	-999	-999	-999
9/10/2014 15:00	2.2	342	14.5	37	0	634	-999	0.066	0.263	-999	-999	-999	-999	-999	-999	-999	-999	-999	-999	-999	-999	-999
9/10/2014 16:00	1	301	14.1	38	0	423	-999	0.038	0.253	-999	-999	-999	-999	-999	-999	-999	-999	-999	-999	-999	-999	-999
9/10/2014 17:00	1.7	297	14	37	0	280	-999	0.042	0.255	-999	-999	-999	-999	-999	-999	-999	-999	-999	-999	-999	-999	-999
9/10/2014 18:00	1.1	318	11.2	45	0	24	-999	0.019	0.293	-999	-999	-999	-999	-999	-999	-999	-999	-999	-999	-999	-999	-999
9/10/2014 19:00	1.2	291	9.4	54	0	2	-999	0.037	0.36	-999	-999	-999	-999	-999	-999	-999	-999	-999	-999	-999	-999	-999
9/10/2014 20:00	1.4	318	9.3	55	0	0	-999	0.034	0.515	-999	-999	-999	-999	-999	-999	-999	-999	-999	-999	-999	-999	-999
9/10/2014 21:00	1.7	333	10.4	51	0	0	-999	0.005	0.445	-999	-999	-999	-999	-999	-999	-999	-999	-999	-999	-999	-999	-999
9/10/2014 22:00	2.1	344	9.9	59	0	0	-999	-0.003	0.444	-999	-999	-999	-999	-999	-999	-999	-999	-999	-999	-999	-999	-999
9/10/2014 23:00	1.2	343	8.2	68	0	0	-999	0.013	0.439	-999	-999	-999	-999	-999	-999	-999	-999	-999	-999	-999	-999	-999
9/11/2014 0:00	1.6	3	8.5	61	0	0	-999	0.006	0.362	-999	-999	-999	-999	-999	-999	-999	-999	-999	-999	-999	-999	-999
9/11/2014 1:00	2	8	8.3	63	0	0	-999	-0.024	0.334	-999	-999	-999	-999	-999	-999	-999	-999	-999	-999	-999	-999	-999
9/11/2014 2:00	1.8	6	8.4	62	0	0	-999	-0.026	0.34	-999	-999	-999	-999	-999	-999	-999	-999	-999	-999	-999	-999	-999
9/11/2014 3:00	1.6	356	8.9	59	0	0	-999	0.033	0.588	-999	-999	-999	-999	-999	-999	-999	-999	-999	-999	-999	-999	-999
9/11/2014 4:00	0.9	7	8.3	58	0	0	-999	-0.013	0.521	-999	-999	-999	-999	-999	-999	-999	-999	-999	-999	-999	-999	-999
9/11/2014 5:00	0.6	168	6.4	75	0	0	-999	-0.002	0.763	-999	-999	-999	-999	-999	-999	-999	-999	-999	-999	-999	-999	-999
9/11/2014 6:00	0.5	155	4.7	92	0	4	-999	0.704	3.171	-999	-999	-999	-999	-999	-999	-999	-999	-999	-999	-999	-999	-999
9/11/2014 7:00	1	149	4.4	96	0	52	-999	0.047	1.21	-999	-999	-999	-999	-999	-999	-999	-999	-999	-999	-999	-999	-999
9/11/2014 8:00	1	163	4.9	96	0	240	-999	0.198	1.055	-999	-999	-999	-999	-999	-999	-999	-999	-999	-999	-999	-999	-999
9/11/2014 9:00	1.4	160	6	87	0	463	-999	0.412	1.134	-999	-999	-999	-999	-999	-999	-999	-999	-999	-999	-999	-999	-999
9/11/2014 10:00	1.9	139	7.4	78	0	586	-999	0.635	1.311	-999	-999	-999	-999	-999	-999	-999	-999	-999	-999	-999	-999	-999
9/11/2014 11:00	2.9	145	8	75	0	701	-999	1.034	1.838	-999	-999	-999	-999	-999	-999	-999	-999	-999	-999	-999	-999	-999
9/11/2014 12:00	3	145	10	67	0	857	-999	1.517	2.847	-999	-999	-999	-999	-999	-999	-999	-999	-999	-999	-999	-999	-999
9/11/2014 13:00	3.2	154	8.4	75	0	818	-999	2.538	4.292	-999	-999	-999	-999	-999	-999	-999	-999	-999	-999	-999	-999	-999
9/11/2014 14:00	2.1	163	6.6	83	0.1	520	-999	3.27	5.616	-999	-999	-999	-999	-999	-999	-999	-999	-999	-999	-999	-999	-999
9/11/2014 15:00	2	158	4.7	92	0	219	-999	2.69	5.433	-999	-999	-999	-999	-999	-999	-999	-999	-999	-999	-999	-999	-999
9/11/2014 16:00	1.5	168	2.9	96	0.7	57	-999	1.546	4.555	-999	-999	-999	-999	-999	-999	-999	-999	-999	-999	-999	-999	-999
9/11/2014 17:00	1.8	169	2	96	1.8	33	-999	0.678	3.228	-999	-999	-999	-999	-999	-999	-999	-999	-999	-999	-999	-999	-999
9/11/2014 18:00	1.4	170	1.8	96	0.1	11	-999	0.566	3.311	-999	-999	-999	-999	-999	-999	-999	-999	-999	-999	-999	-999	-999
9/11/2014 19:00	1.8	164	1	96	0.1	1	-999	0.125	2.565	-999	-999	-999	-999	-999	-999	-999	-999	-999	-999	-999	-999	-999
9/11/2014 20:00	1.4	185	-0.1	96	0	0	-999	0.041	2.143	-999	-999	-999	-999	-999	-999	-999	-999	-999	-999	-999	-999	-999
9/11/2014 21:00	1.7	182	-0.9	96	0	0	-999	0.005	1.696	-999	-999	-999	-999	-999	-999	-999	-999	-999	-999	-999	-999	-999
9/11/2014 22:00	1.8	174	-1.3	96	0	0	-999	0.001	1.392	-999	-999	-999	-999	-999	-999	-999	-999	-999	-999	-999	-999	-999
9/11/2014 23:00	2.4	172	-2.1	96	0.2	0	-999	-0.021	0.917	-999	-999	-999	-999	-999	-999	-999	-999	-999	-999	-999	-999	-999
9/12/2014 0:00	2.2	165	-3.1	95	0	0	-999	-0.011	0.466	-999	-999	-999	-999	-999	-999	-999	-999	-999	-999	-999	-999	-999
9/12/2014 1:00	1.9	168	-4.1	94	0	0	-999	-0.002	0.73	-999	-999	-999	-999	-999	-999	-999	-999	-999	-999	-999	-999	-999
9/12/2014 2:00	1.9	156	-4.8	94	0	0	-999	0.039	0.729	-999	-999	-999	-999	-999	-999	-999	-999	-999	-999	-999	-999	-999
9/12/2014 3:00	1.7	149	-5.2	93	0	0	-999	0.086	0.599	-999	-999	-999	-999	-999	-999	-999	-999	-999	-999	-999	-999	-999
9/12/2014 4:00	1.6	141	-5.4	93	0	0	-999	-999	-999	-999	-999	-999	-999	-999	-999	-999	-999	-999	-999	-999	-999	-999
9/12/2014 5:00	1.4	152	-5.5	93	0	0	-999	0.004	0.469	-999	-999	-999	-999	-999	-999	-999	-999	-999	-999	-999	-999	-999
9/12/2014 6:00	1.2	143	-5.7	93	0	2	-999	0.021	0.471	-999	-999	-999	-999	-999	-999	-999	-999	-999	-999	-999	-999	-999
9/12/2014 7:00	1.1	144	-5.6	93	0	47	-999	-999	-999	-999	-999	-999	-999	-999	-999	-999	-999	-999	-999	-999	-999	-999
9/12/2014 8:00	1	124	-5.3	93	0	119	-999	0.273	0.81	-999	-999	-999	-999	-999	-999	-999	-999	-999	-999	-999	-999	-999
9/12/2014 9:00	0.9	126	-4.5	94	0	249	-999	0.485	1.076	-999	-999	-999	-999	-999	-999	-999	-999	-999	-999	-999	-999	-999
9/12/2014 10:00	0.7	146	-2.7	95	0	392	-999	0.762	1.442	-999	-999	-999	-999	-999	-999	-999	-999	-999	-999	-999	-999	-999
9/12/2014 11:00	1	157	-0.7	96	0	531	-999	0.896	1.82	-999	-999	-999	-999	-999	-999	-999	-999	-999	-999	-999	-999	-999
9/12/2014 12:00	1	172	0.8	96	0	667	-999	0.717	1.596	-999	-999	-999	-999	-999	-999	-999	-999	-999	-999	-999	-999	-999
9/12/2014 13:00	1.9	150	2.6	89	0	704	-999	0.591	1.455	-999	-999	-999	-999	-999	-999	-999	-999	-999	-999	-999	-999	-999
9/12/2014 14:00	1.5	153	3.7	83	0	645	-999	0.317	1.022	-999	-999	-999	-999	-999	-999	-999	-999	-999	-999	-999	-999	-999
9/12/2014 15:00	1.8	158	5.4	57	0	675	-999	0.149	0.671	-999	-999	-999	-999	-999	-999	-999	-999	-999	-999	-999	-999	-999
9/12/2014 16:00	2.2	161	5.4	47	0	491	-999	0.171	0.749	-999	-999	-999	-999	-999	-999	-999	-999	-999	-999	-999	-999	-999
9/12/2014 17:00	1.7	158	5	46	0	299	-999	0.112	0.68	-999	-999	-999	-999	-999	-999	-999	-999	-999	-999	-999	-999	-999
9/12/2014 18:00	1.7	252	1.7	73	0	37	-999	0.079	0.56	-999	-999	-999	-999	-999	-999	-999	-999	-999	-999	-999	-999	-999
9/12/2014 19:00	0.8	265	-0.9	86	0	2	-999	-0.001	0.348	-999	-999	-999	-999	-999	-999	-999	-999	-999	-999	-999	-999	-999
9/12/2014 20:00	0.6	290	-1.6	87	0	0	-999	-0.031	0.454	-999	-999	-999	-999	-999	-999	-999	-999	-999	-999	-999	-999	-999
9/12/2014 21:00	0.6	325	-1.9	88	0	0	-999	-0.011	0.602	-999	-999	-999	-999	-999	-999	-999	-999	-999	-999	-999	-999	-999
9/12/2014 22:00	0.7	310	-2.2	86	0	0	-999	0.023	0.627	-999	-999	-999	-999	-999	-999	-999	-999	-999	-999	-999	-999	-999
9/12/2014 23:00	1	298	-1.5	81	0	0	-999	0.044	0.422	-999	-999	-999	-999	-999	-999	-999	-999	-999	-999	-999	-999	-999
9/13/2014 0:00	1.2	297	-1.3	77	0	0	-999	-0.019	0.222	-999	-999	-999	-999	-999	-999	-999	-999	-999	-999	-999	-999	-999
9/13/2014 1:00	1.3	271	-1.4	78	0	0	-999	0.055	0.146	-999	-999	-999	-999	-999	-999	-999	-999	-999	-999	-999	-999	-999
9/13/2014 2:00	1.1	270	-1.6	78	0	0	-999	0.013	0.217	-999	-999	-999	-999	-999	-999	-999	-999	-999	-999	-999	-999	-999
9/13/2014 3:00	1	296	0.1	66	0	0	-999	0.031	0.271	-999	-999	-999	-999	-999	-999	-999	-999	-999	-999	-999	-999	-999
9/13/2014 4:00	1.4	321	3	52	0	0	-999	0.013	0.398	-999	-999	-999	-999	-999	-999	-999	-999	-999	-999	-999	-999	-999
9/13/2014 5:00	3	349	5.7	44	0	0	-999	0.044	0.404	-999	-999	-999	-999	-999	-999	-999	-999	-999	-999	-999	-999	-999
9/13/2014 6:00	2.8	344	6.9	41	0	5	-999	0.027	0.391	-999	-999	-999	-999	-999	-999	-999	-999	-999	-999	-999	-999	-999
9/13/2014 7:00	2.7	349	7.4	42	0	54	-999	0.044	0.484	-999	-999	-999	-999	-999	-999	-999	-999	-999	-999	-999	-999	-999
9/13/2014 8:00	2.9	2	8.6	39	0	111	-999	0.054	0.497	-999	-999	-999	-999	-999	-999	-999	-999	-999	-999	-999	-999	-999
9/13/2014 9:00	3.5	7	10.4	33	0	267	-999	0.093	0.563	-999	-999	-999	-999	-999	-999	-999	-999	-999	-999	-999	-999	-999
9/13/2014 10:00	3	5	13	29	0	543	-999	0.058	0.427	-999	-999	-999	-999	-999	-999	-999	-999	-999	-999	-999	-999	-999
9/13/2014 11:00	2.3	355	14.9	26	0	801	-999	0.029	0.395	-999	-999	-999	-999	-999	-999	-999	-999	-999	-999	-999	-999	-999
9/13/2014 12:00	2	334	15.8	25	0	876	-999	0.053	0.382	-999	-999	-999	-999	-999	-999	-999	-999	-999	-999	-999	-999	-999
9/13/2014 13:00	2.5	314	16.6	23	0	832	-999	0.046	0.366	-999	-999	-999	-999	-999	-999	-999	-999	-999	-999	-999	-999	-999
9/13/2014 14:00	2.6	279	16.7	22	0	749	-999	0.035	0.307	-999	-999	-999	-999	-999	-999	-999	-999	-999	-999	-999	-999	-999
9/13/2014 15:00	1.4	302	17.2	22	0	659	-999	0.03	0.301	-999	-999	-999	-999	-999	-999	-999	-999	-999	-999	-999	-999	-999
9/13/2014 16:00	1.6	282	17	21	0	493	-999	0.031	0.297	-999	-999	-999	-999	-999	-999	-999	-999	-999	-999	-999	-999	-999
9/13/2014 17:00	1.9	309	16.4	21	0	285	-999	0.058	0.358	-999	-999	-999	-999	-999	-999	-999	-999	-999	-999	-999	-999	-999
9/13/2014 18:00	0.9	218	11.7	45	0	38	-999	0.08	2.613	-999	-999	-999	-999	-999	-999	-999	-999	-999	-999	-999	-999	-999
9/13/2014 19:00	1.3	244	6.8	66	0	2	-999	-0.028	2.958	-999	-999	-999	-999	-999	-999	-999	-999	-999	-999	-999	-999	-999
9/13/2014 20:00	1.5	238	5.1	73	0	0	-999	0.018	4.699	-999	-999	-999	-999	-999	-999	-999	-999	-999	-999	-999	-999	-999
9/13/2014 21:00	0.9	264	3.7	80	0	0	-999	0.02	4.832	-999	-999	-999	-999	-999	-999	-999	-999	-999	-999	-999	-999	-999
9/13/2014 22:00	1.1	279	3.5	79	0	0	-999	0.021	3.546	-999	-999	-999	-999	-999	-999	-999	-999	-999	-999	-999	-999	-999
9/13/2014 23:00	1.2	311	3.3	78	0	0	-999	0.052	2.38	-999	-999	-999	-999	-999	-999	-999	-999	-999	-999	-999	-999	-999
9/14/2014 0:00	1	284	2.8	75	0	0	-999	0.019	0.861	-999	-999	-999	-999	-999	-999	-999	-999	-999	-999	-999	-999	-999
9/14/2014 1:00	0.8	294	4.3	66	0	0	-999	-0.005	0.485	-999	-999	-999	-999	-999	-999	-999	-999	-999	-999	-999	-999	-999
9/14/2014 2:00	1.2	314	5.8	57	0	0	-999	-0.007	0.376	-999	-999	-999	-999	-999	-999	-999	-999	-999	-999	-999	-999	-999
9/14/2014 3:00	1.2	271	4.1	66	0	0	-999	-0.03	0.273	-999	-999	-999	-999	-999	-999	-999	-999	-999	-999	-999	-999	-999
9/14/2014 4:00	1.6	287	4.7	59	0	0	-999	-999	-999	-999	-999	-999	-999	-999	-999	-999	-999	-999	-999	-999	-999	-999
9/14/2014 5:00	1.6	310	5.9	53	0	0	-999	0	0.312	-999	-999	-999	-999	-999	-999	-999	-999	-999	-999	-999	-999	-999
9/14/2014 6:00	1.9	336	9.5	39	0	2	-999	0.014	0.405	-999	-999	-999	-999	-999	-999	-999	-999	-999	-999	-999	-999	-999
9/14/2014 7:00	1.5	333	10.3	40	0	46	-999	0.051	0.598	-999	-999	-999	-999	-999	-999	-999	-999	-999	-999	-999	-999	-999
9/14/2014 8:00	0.6	121	12.8	38	0	310	-999	0.09	0.702	-999	-999	-999	-999	-999	-999	-999	-999	-999	-999	-999	-999	-999
9/14/2014 9:00	1.3	320	15.9	32	0	476	-999	0.04	0.553	-999	-999	-999	-999	-999	-999	-999	-999	-999	-999	-999	-999	-999
9/14/2014 10:00	2.1	348	17.2	29	0	672	-999	0.076	0.543	-999	-999	-999	-999	-999	-999	-999	-999	-999	-999	-999	-999	-999
9/14/2014 11:00	1.9	280	17.7	26	0	805	-999	0.021	0.454	-999	-999	-999	-999	-999	-999	-999	-999	-999	-999	-999	-999	-999
9/14/2014 12:00	1.6	307	17.6	27	0	477	-999	0.058	0.473	-999	-999	-999	-999	-999	-999	-999	-999	-999	-999	-999	-999	-999
9/14/2014 13:00	2.2	296	18.1	27	0	593	-999	0.048	0.392	-999	-999	-999	-999	-999	-999	-999	-999	-999	-999	-999	-999	-999
9/14/2014 14:00	1.5	283	19.1	25	0	835	-999	0.019	0.378	-999	-999	-999	-999	-999	-999	-999	-999	-999	-999	-999	-999	-999
9/14/2014 15:00	2.5	320	17.1	30	0	517	-999	0.042	0.342	-999	-999	-999	-999	-999	-999	-999	-999	-999	-999	-999	-999	-999
9/14/2014 16:00	1	283	16.6	32	0	273	-999	0.026	0.416	-999	-999	-999	-999	-999	-999	-999	-999	-999	-999	-999	-999	-999
9/14/2014 17:00	1.5	269	10.5	67	0.4	121	-999	0.051	0.424	-999	-999	-999	-999	-999	-999	-999	-999	-999	-999	-999	-999	-999
9/14/2014 18:00	1.3	322	11	60	0	29	-999	0.034	0.444	-999	-999	-999	-999	-999	-999	-999	-999	-999	-999	-999	-999	-999
9/14/2014 19:00	1.8	346	12.2	46	0	2	-999	0	0.353	-999	-999	-999	-999	-999	-999	-999	-999	-999	-999	-999	-999	-999
9/14/2014 20:00	0.7	263	9	59	0	0	-999	0.005	0.364	-999	-999	-999	-999	-999	-999	-999	-999	-999	-999	-999	-999	-999
9/14/2014 21:00	1.1	295	7.4	67	0	0	-999	-0.008	0.328	-999	-999	-999	-999	-999	-999	-999	-999	-999	-999	-999	-999	-999
9/14/2014 22:00	1.3	294	6.5	69	0	0	-999	-0.009	0.263	-999	-999	-999	-999	-999	-999	-999	-999	-999	-999	-999	-999	-999
9/14/2014 23:00	0.9	295	5.8	70	0.1	0	-999	0	0.272	-999	-999	-999	-999	-999	-999	-999	-999	-999	-999	-999	-999	-999
9/15/2014 0:00	1	309	5.2	71	0	0	-999	0.032	0.414	-999	-999	-999	-999	-999	-999	-999	-999	-999	-999	-999	-999	-999
9/15/2014 1:00	0.9	324	4.9	72	0	0	-999	0.01	0.385	-999	-999	-999	-999	-999	-999	-999	-999	-999	-999	-999	-999	-999
9/15/2014 2:00	0.5	317	5.4	71	0	0	-999	0.029	0.364	-999	-999	-999	-999	-999	-999	-999	-999	-999	-999	-999	-999	-999
9/15/2014 3:00	0.3	250	5.1	67	0	0	-999	0.022	0.323	-999	-999	-999	-999	-999	-999	-999	-999	-999	-999	-999	-999	-999
9/15/2014 4:00	0.5	279	2.8	79	0	0	-999	0	0.474	-999	-999	-999	-999	-999	-999	-999	-999	-999	-999	-999	-999	-999
9/15/2014 5:00	0.9	279	1.2	87	0	0	-999	0.035	0.485	-999	-999	-999	-999	-999	-999	-999	-999	-999	-999	-999	-999	-999
9/15/2014 6:00	0.8	295	0.9	90	0	3	-999	0.04	0.616	-999	-999	-999	-999	-999	-999	-999	-999	-999	-999	-999	-999	-999
9/15/2014 7:00	0.7	315	1.4	89	0	60	-999	0.048	0.582	-999	-999	-999	-999	-999	-999	-999	-999	-999	-999	-999	-999	-999
9/15/2014 8:00	0.5	87	7.4	74	0	303	-999	0.314	1.8	-999	-999	-999	-999	-999	-999	-999	-999	-999	-999	-999	-999	-999
9/15/2014 9:00	1.3	122	11.5	60	0	489	-999	0.151	1.196	-999	-999	-999	-999	-999	-999	-999	-999	-999	-999	-999	-999	-999
9/15/2014 10:00	2.4	142	14.3	52	0	645	-999	0.162	1.277	-999	-999	-999	-999	-999	-999	-999	-999	-999	-999	-999	-999	-999
9/15/2014 11:00	2.3	166	15.8	46	0	769	-999	0.066	0.999	-999	-999	-999	-999	-999	-999	-999	-999	-999	-999	-999	-999	-999
9/15/2014 12:00	1.5	225	18.1	34	0	892	-999	0.104	1.008	-999	-999	-999	-999	-999	-999	-999	-999	-999	-999	-999	-999	-999
9/15/2014 13:00	2.4	154	17.3	41	0	650	-999	0.157	2.001	-999	-999	-999	-999	-999	-999	-999	-999	-999	-999	-999	-999	-999
9/15/2014 14:00	1.9	179	14.7	53	0	452	-999	0.374	3.68	-999	-999	-999	-999	-999	-999	-999	-999	-999	-999	-999	-999	-999
9/15/2014 15:00	2	156	15.5	46	0	484	-999	0.276	2.705	-999	-999	-999	-999	-999	-999	-999	-999	-999	-999	-999	-999	-999
9/15/2014 16:00	1.1	168	13.3	51	0	73	-999	0.13	2.71	-999	-999	-999	-999	-999	-999	-999	-999	-999	-999	-999	-999	-999
9/15/2014 17:00	1.1	147	13.4	49	0	79	-999	0.119	1.518	-999	-999	-999	-999	-999	-999	-999	-999	-999	-999	-999	-999	-999
9/15/2014 18:00	0.9	152	11.9	52	0	24	-999	0.044	0.562	-999	-999	-999	-999	-999	-999	-999	-999	-999	-999	-999	-999	-999
9/15/2014 19:00	1.1	295	9.4	62	0	1	-999	0.057	0.913	-999	-999	-999	-999	-999	-999	-999	-999	-999	-999	-999	-999	-999
9/15/2014 20:00	0.9	291	7	71	0	0	-999	0.038	0.779	-999	-999	-999	-999	-999	-999	-999	-999	-999	-999	-999	-999	-999
9/15/2014 21:00	1.2	320	6.2	71	0	0	-999	-0.001	0.775	-999	-999	-999	-999	-999	-999	-999	-999	-999	-999	-999	-999	-999
9/15/2014 22:00	0.8	295	5.3	74	0	0	-999	-0.014	0.867	-999	-999	-999	-999	-999	-999	-999	-999	-999	-999	-999	-999	-999
9/15/2014 23:00	1	298	5.8	70	0	0	-999	0.005	1.064	-999	-999	-999	-999	-999	-999	-999	-999	-999	-999	-999	-999	-999
9/16/2014 0:00	1.2	327	5.9	70	0	0	-999	0.031	0.558	-999	-999	-999	-999	-999	-999	-999	-999	-999	-999	-999	-999	-999
9/16/2014 1:00	1.2	325	5.9	69	0	0	-999	0.034	0.552	-999	-999	-999	-999	-999	-999	-999	-999	-999	-999	-999	-999	-999
9/16/2014 2:00	1.2	279	5.4	71	0	0	-999	-0.006	0.368	-999	-999	-999	-999	-999	-999	-999	-999	-999	-999	-999	-999	-999
9/16/2014 3:00	1.5	296	5.3	71	0	0	-999	0.014	0.309	-999	-999	-999	-999	-999	-999	-999	-999	-999	-999	-999	-999	-999
9/16/2014 4:00	1.6	311	8.2	56	0	0	-999	-999	-999	-999	-999	-999	-999	-999	-999	-999	-999	-999	-999	-999	-999	-999
9/16/2014 5:00	1.7	316	9.5	51	0	0	-999	0.012	0.637	-999	-999	-999	-999	-999	-999	-999	-999	-999	-999	-999	-999	-999
9/16/2014 6:00	1.6	315	10.7	45	0	2	-999	0.002	0.577	-999	-999	-999	-999	-999	-999	-999	-999	-999	-999	-999	-999	-999
9/16/2014 7:00	1.4	331	11.7	43	0	55	-999	-999	-999	-999	-999	-999	-999	-999	-999	-999	-999	-999	-999	-999	-999	-999
9/16/2014 8:00	1.3	337	15.6	37	0	306	-999	0.093	0.808	-999	-999	-999	-999	-999	-999	-999	-999	-999	-999	-999	-999	-999
9/16/2014 9:00	2.1	336	17.3	31	0	484	-999	0.086	0.816	-999	-999	-999	-999	-999	-999	-999	-999	-999	-999	-999	-999	-999
9/16/2014 10:00	2.2	328	18.1	29	0	652	-999	0.073	0.783	-999	-999	-999	-999	-999	-999	-999	-999	-999	-999	-999	-999	-999
9/16/2014 11:00	2.3	328	18.6	28	-999	766	-999	0.088	0.725	-999	-999	-999	-999	-999	-999	-999	-999	-999	-999	-999	-999	-999
9/16/2014 12:00	2.5	310	19.5	26	-999	877	-999	0.071	0.671	-999	-999	-999	-999	-999	-999	-999	-999	-999	-999	-999	-999	-999
9/16/2014 13:00	1.5	301	20.2	24	0	894	-999	0.057	0.665	-999	-999	-999	-999	-999	-999	-999	-999	-999	-999	-999	-999	-999
9/16/2014 14:00	1.9	282	20.2	25	0	761	-999	0.011	0.624	-999	-999	-999	-999	-999	-999	-999	-999	-999	-999	-999	-999	-999
9/16/2014 15:00	1.6	287	19.7	25	0	470	-999	0.049	0.762	-999	-999	-999	-999	-999	-999	-999	-999	-999	-999	-999	-999	-999
9/16/2014 16:00	1.3	8	19.7	24	0	302	-999	0.048	0.607	-999	-999	-999	-999	-999	-999	-999	-999	-999	-999	-999	-999	-999
9/16/2014 17:00	1.1	213	17.6	32	0	149	-999	0.056	1.418	-999	-999	-999	-999	-999	-999	-999	-999	-999	-999	-999	-999	-999
9/16/2014 18:00	1.5	251	14	46	0	27	-999	-0.066	1.913	-999	-999	-999	-999	-999	-999	-999	-999	-999	-999	-999	-999	-999
9/16/2014 19:00	1.1	275	11.5	54	0	2	-999	0.008	1.535	-999	-999	-999	-999	-999	-999	-999	-999	-999	-999	-999	-999	-999
9/16/2014 20:00	1.3	312	10.6	53	0	0	-999	0.004	1.601	-999	-999	-999	-999	-999	-999	-999	-999	-999	-999	-999	-999	-999
9/16/2014 21:00	1.8	303	10.2	51	0	0	-999	0.012	1.22	-999	-999	-999	-999	-999	-999	-999	-999	-999	-999	-999	-999	-999
9/16/2014 22:00	1	289	7.6	57	0	0	-999	-0.018	0.571	-999	-999	-999	-999	-999	-999	-999	-999	-999	-999	-999	-999	-999
9/16/2014 23:00	0.9	303	7.2	58	0	0	-999	-0.021	0.641	-999	-999	-999	-999	-999	-999	-999	-999	-999	-999	-999	-999	-999
9/17/2014 0:00	1.1	319	7.4	55	0	0	-999	0.005	0.541	-999	-999	-999	-999	-999	-999	-999	-999	-999	-999	-999	-999	-999
9/17/2014 1:00	1.3	311	9.9	43	0	0	-999	-0.008	0.441	-999	-999	-999	-999	-999	-999	-999	-999	-999	-999	-999	-999	-999
9/17/2014 2:00	1.3	324	10.4	41	0	0	-999	-0.006	0.388	-999	-999	-999	-999	-999	-999	-999	-999	-999	-999	-999	-999	-999
9/17/2014 3:00	0.8	291	7.5	55	0	0	-999	0.026	0.373	-999	-999	-999	-999	-999	-999	-999	-999	-999	-999	-999	-999	-999
9/17/2014 4:00	0.9	305	6.3	58	0	0	-999	0.06	0.58	-999	-999	-999	-999	-999	-999	-999	-999	-999	-999	-999	-999	-999
9/17/2014 5:00	1.1	287	6.9	57	0	0	-999	0.001	0.521	-999	-999	-999	-999	-999	-999	-999	-999	-999	-999	-999	-999	-999
9/17/2014 6:00	1.4	290	7.6	52	0	2	-999	-0.001	0.276	-999	-999	-999	-999	-999	-999	-999	-999	-999	-999	-999	-999	-999
9/17/2014 7:00	0.8	290	6.4	63	0	62	-999	0.01	0.343	-999	-999	-999	-999	-999	-999	-999	-999	-999	-999	-999	-999	-999
9/17/2014 8:00	1.1	298	15.7	38	0	340	-999	0.096	0.95	-999	-999	-999	-999	-999	-999	-999	-999	-999	-999	-999	-999	-999
9/17/2014 9:00	1.7	282	18	30	0	412	-999	0.056	0.735	-999	-999	-999	-999	-999	-999	-999	-999	-999	-999	-999	-999	-999
9/17/2014 10:00	1.4	300	18.8	29	0	581	-999	0.099	0.781	-999	-999	-999	-999	-999	-999	-999	-999	-999	-999	-999	-999	-999
9/17/2014 11:00	2.6	273	19.4	26	0	608	-999	0.057	0.644	-999	-999	-999	-999	-999	-999	-999	-999	-999	-999	-999	-999	-999
9/17/2014 12:00	1.9	269	20.2	22	0	762	-999	0.038	0.552	-999	-999	-999	-999	-999	-999	-999	-999	-999	-999	-999	-999	-999
9/17/2014 13:00	0.4	226	21.2	22	0	875	-999	0.165	0.637	-999	-999	-999	-999	-999	-999	-999	-999	-999	-999	-999	-999	-999
9/17/2014 14:00	2.4	103	19.8	28	0	516	-999	0.101	1.033	-999	-999	-999	-999	-999	-999	-999	-999	-999	-999	-999	-999	-999
9/17/2014 15:00	1.6	180	19.1	31	0	335	-999	0.081	1.56	-999	-999	-999	-999	-999	-999	-999	-999	-999	-999	-999	-999	-999
9/17/2014 16:00	1.6	159	18.3	33	0	242	-999	0.092	1.778	-999	-999	-999	-999	-999	-999	-999	-999	-999	-999	-999	-999	-999
9/17/2014 17:00	1.2	10	17	37	0	75	-999	0.06	1.968	-999	-999	-999	-999	-999	-999	-999	-999	-999	-999	-999	-999	-999
9/17/2014 18:00	0.5	198	14.7	44	0	29	-999	0.079	2.167	-999	-999	-999	-999	-999	-999	-999	-999	-999	-999	-999	-999	-999
9/17/2014 19:00	1.1	281	11	55	0	1	-999	0.104	2.001	-999	-999	-999	-999	-999	-999	-999	-999	-999	-999	-999	-999	-999
9/17/2014 20:00	1.5	296	9.9	57	0	0	-999	0.024	1.505	-999	-999	-999	-999	-999	-999	-999	-999	-999	-999	-999	-999	-999
9/17/2014 21:00	1.4	300	9.2	58	0	0	-999	0.001	1.665	-999	-999	-999	-999	-999	-999	-999	-999	-999	-999	-999	-999	-999
9/17/2014 22:00	0.6	312	7.2	66	0	0	-999	0.01	1.93	-999	-999	-999	-999	-999	-999	-999	-999	-999	-999	-999	-999	-999
9/17/2014 23:00	0.9	298	8	60	0	0	-999	0.005	1.706	-999	-999	-999	-999	-999	-999	-999	-999	-999	-999	-999	-999	-999
9/18/2014 0:00	1.5	309	8	58	0	0	-999	-0.014	0.818	-999	-999	-999	-999	-999	-999	-999	-999	-999	-999	-999	-999	-999
9/18/2014 1:00	1.2	306	6.5	65	0	0	-999	-0.021	0.498	-999	-999	-999	-999	-999	-999	-999	-999	-999	-999	-999	-999	-999
9/18/2014 2:00	1	286	6.9	60	0	0	-999	-0.021	0.359	-999	-999	-999	-999	-999	-999	-999	-999	-999	-999	-999	-999	-999
9/18/2014 3:00	0.7	305	6.8	61	0	0	-999	-0.004	0.433	-999	-999	-999	-999	-999	-999	-999	-999	-999	-999	-999	-999	-999
9/18/2014 4:00	1	315	6.8	59	0	0	-999	-999	-999	-999	-999	-999	-999	-999	-999	-999	-999	-999	-999	-999	-999	-999
9/18/2014 5:00	1.4	322	6.2	62	0	0	-999	-0.018	0.366	-999	-999	-999	-999	-999	-999	-999	-999	-999	-999	-999	-999	-999
9/18/2014 6:00	1.6	313	8	50	0	2	-999	0.022	0.302	-999	-999	-999	-999	-999	-999	-999	-999	-999	-999	-999	-999	-999
9/18/2014 7:00	0.9	306	6.6	61	0	51	-999	0.025	0.413	-999	-999	-999	-999	-999	-999	-999	-999	-999	-999	-999	-999	-999
9/18/2014 8:00	0.6	340	14	46	0	303	-999	0.241	1.479	-999	-999	-999	-999	-999	-999	-999	-999	-999	-999	-999	-999	-999
9/18/2014 9:00	1	119	18.1	29	0	493	-999	0.09	0.861	-999	-999	-999	-999	-999	-999	-999	-999	-999	-999	-999	-999	-999
9/18/2014 10:00	1.2	109	19.5	24	0	647	-999	0.039	0.598	-999	-999	-999	-999	-999	-999	-999	-999	-999	-999	-999	-999	-999
9/18/2014 11:00	1.6	133	20.5	23	0	758	-999	0.138	0.753	-999	-999	-999	-999	-999	-999	-999	-999	-999	-999	-999	-999	-999
9/18/2014 12:00	2.5	128	21	26	0	808	-999	0.075	0.865	-999	-999	-999	-999	-999	-999	-999	-999	-999	-999	-999	-999	-999
9/18/2014 13:00	3.4	131	21	26	0	802	-999	0.038	0.895	-999	-999	-999	-999	-999	-999	-999	-999	-999	-999	-999	-999	-999
9/18/2014 14:00	2.9	136	20.9	26	0	740	-999	0.061	1.163	-999	-999	-999	-999	-999	-999	-999	-999	-999	-999	-999	-999	-999
9/18/2014 15:00	3.3	146	20.5	27	0	536	-999	0.087	1.717	-999	-999	-999	-999	-999	-999	-999	-999	-999	-999	-999	-999	-999
9/18/2014 16:00	2.9	142	19.7	28	0	361	-999	0.089	2.564	-999	-999	-999	-999	-999	-999	-999	-999	-999	-999	-999	-999	-999
9/18/2014 17:00	2.8	154	19.4	27	0	259	-999	0.248	4.903	-999	-999	-999	-999	-999	-999	-999	-999	-999	-999	-999	-999	-999
9/18/2014 18:00	1.6	214	15.7	37	0	23	-999	0.132	5.612	-999	-999	-999	-999	-999	-999	-999	-999	-999	-999	-999	-999	-999
9/18/2014 19:00	0.9	188	11.6	48	0	1	-999	0.046	4.058	-999	-999	-999	-999	-999	-999	-999	-999	-999	-999	-999	-999	-999
9/18/2014 20:00	0.5	262	10	54	0	0	-999	0.052	2.941	-999	-999	-999	-999	-999	-999	-999	-999	-999	-999	-999	-999	-999
9/18/2014 21:00	0.5	292	8.8	59	0	0	-999	0.041	2.413	-999	-999	-999	-999	-999	-999	-999	-999	-999	-999	-999	-999	-999
9/18/2014 22:00	1.1	316	9.5	52	0	0	-999	0.004	2.312	-999	-999	-999	-999	-999	-999	-999	-999	-999	-999	-999	-999	-999
9/18/2014 23:00	1.3	297	9	54	0	0	-999	0.003	1.621	-999	-999	-999	-999	-999	-999	-999	-999	-999	-999	-999	-999	-999
9/19/2014 0:00	1	332	10.8	46	0	0	-999	0.006	1.86	-999	-999	-999	-999	-999	-999	-999	-999	-999	-999	-999	-999	-999
9/19/2014 1:00	1.7	301	12.7	40	0	0	-999	0.017	0.8	-999	-999	-999	-999	-999	-999	-999	-999	-999	-999	-999	-999	-999
9/19/2014 2:00	1.5	327	11.4	43	0	0	-999	0.051	0.82	-999	-999	-999	-999	-999	-999	-999	-999	-999	-999	-999	-999	-999
9/19/2014 3:00	1.7	356	12.8	40	0	0	-999	0.033	0.829	-999	-999	-999	-999	-999	-999	-999	-999	-999	-999	-999	-999	-999
9/19/2014 4:00	1.5	359	13.8	37	0	0	-999	0	0.715	-999	-999	-999	-999	-999	-999	-999	-999	-999	-999	-999	-999	-999
9/19/2014 5:00	1.7	335	14.7	35	0	0	-999	0	0.551	-999	-999	-999	-999	-999	-999	-999	-999	-999	-999	-999	-999	-999
9/19/2014 6:00	2.5	330	15	36	0	2	-999	-0.003	0.57	-999	-999	-999	-999	-999	-999	-999	-999	-999	-999	-999	-999	-999
9/19/2014 7:00	2.4	322	15.3	37	0	47	-999	0.046	0.635	-999	-999	-999	-999	-999	-999	-999	-999	-999	-999	-999	-999	-999
9/19/2014 8:00	1.2	289	18	34	0	294	-999	0.116	0.798	-999	-999	-999	-999	-999	-999	-999	-999	-999	-999	-999	-999	-999
9/19/2014 9:00	0.5	84	19.3	31	0	484	-999	0.056	0.753	-999	-999	-999	-999	-999	-999	-999	-999	-999	-999	-999	-999	-999
9/19/2014 10:00	2.1	136	20	30	0	641	-999	0.031	0.634	-999	-999	-999	-999	-999	-999	-999	-999	-999	-999	-999	-999	-999
9/19/2014 11:00	2.1	280	20.6	28	0	601	-999	0.024	0.539	-999	-999	-999	-999	-999	-999	-999	-999	-999	-999	-999	-999	-999
9/19/2014 12:00	3.4	277	20.9	26	0	689	-999	0.033	0.445	-999	-999	-999	-999	-999	-999	-999	-999	-999	-999	-999	-999	-999
9/19/2014 13:00	3.8	262	21.8	25	0	833	-999	0.055	0.545	-999	-999	-999	-999	-999	-999	-999	-999	-999	-999	-999	-999	-999
9/19/2014 14:00	2.2	277	22.2	23	0	789	-999	0.021	0.465	-999	-999	-999	-999	-999	-999	-999	-999	-999	-999	-999	-999	-999
9/19/2014 15:00	1.9	274	22.5	24	0	638	-999	0.011	0.534	-999	-999	-999	-999	-999	-999	-999	-999	-999	-999	-999	-999	-999
9/19/2014 16:00	1.4	146	20.3	32	0	316	-999	0.065	2.262	-999	-999	-999	-999	-999	-999	-999	-999	-999	-999	-999	-999	-999
9/19/2014 17:00	0.9	194	17.1	42	0	33	-999	0.085	4.415	-999	-999	-999	-999	-999	-999	-999	-999	-999	-999	-999	-999	-999
9/19/2014 18:00	0.8	294	15.5	52	0.1	7	-999	0.018	4.057	-999	-999	-999	-999	-999	-999	-999	-999	-999	-999	-999	-999	-999
9/19/2014 19:00	0.7	305	13	60	0	1	-999	0.006	1.814	-999	-999	-999	-999	-999	-999	-999	-999	-999	-999	-999	-999	-999
9/19/2014 20:00	1.1	316	12.9	51	0	0	-999	0.048	0.984	-999	-999	-999	-999	-999	-999	-999	-999	-999	-999	-999	-999	-999
9/19/2014 21:00	0.3	225	12.4	54	0	0	-999	-0.009	0.836	-999	-999	-999	-999	-999	-999	-999	-999	-999	-999	-999	-999	-999
9/19/2014 22:00	0.5	284	11.1	59	0	0	-999	-0.002	1.701	-999	-999	-999	-999	-999	-999	-999	-999	-999	-999	-999	-999	-999
9/19/2014 23:00	0.9	320	9.6	65	0	0	-999	0.019	2.181	-999	-999	-999	-999	-999	-999	-999	-999	-999	-999	-999	-999	-999
9/20/2014 0:00	1.6	299	9.8	63	0	0	-999	0.025	1.944	-999	-999	-999	-999	-999	-999	-999	-999	-999	-999	-999	-999	-999
9/20/2014 1:00	1.6	279	10	62	0	0	-999	-0.004	1.05	-999	-999	-999	-999	-999	-999	-999	-999	-999	-999	-999	-999	-999
9/20/2014 2:00	1.3	291	9.2	64	0	0	-999	-0.023	0.472	-999	-999	-999	-999	-999	-999	-999	-999	-999	-999	-999	-999	-999
9/20/2014 3:00	0.7	325	7.4	70	0	0	-999	0.001	0.482	-999	-999	-999	-999	-999	-999	-999	-999	-999	-999	-999	-999	-999
9/20/2014 4:00	0.9	343	6.5	70	0	0	-999	-999	-999	-999	-999	-999	-999	-999	-999	-999	-999	-999	-999	-999	-999	-999
9/20/2014 5:00	0.9	347	5.7	71	0	0	-999	0.007	0.32	-999	-999	-999	-999	-999	-999	-999	-999	-999	-999	-999	-999	-999
9/20/2014 6:00	0.7	302	6.3	66	0	2	-999	-0.007	0.281	-999	-999	-999	-999	-999	-999	-999	-999	-999	-999	-999	-999	-999
9/20/2014 7:00	1.2	306	6.6	66	0	45	-999	-999	-999	-999	-999	-999	-999	-999	-999	-999	-999	-999	-999	-999	-999	-999
9/20/2014 8:00	1.4	132	11.9	58	0	295	-999	0.206	1.266	-999	-999	-999	-999	-999	-999	-999	-999	-999	-999	-999	-999	-999
9/20/2014 9:00	1.8	133	14.3	52	0	485	-999	0.139	1.267	-999	-999	-999	-999	-999	-999	-999	-999	-999	-999	-999	-999	-999
9/20/2014 10:00	1.1	149	16.1	47	0	640	-999	0.195	1.558	-999	-999	-999	-999	-999	-999	-999	-999	-999	-999	-999	-999	-999
9/20/2014 11:00	1.7	164	18.1	38	0	744	-999	0.107	1.076	-999	-999	-999	-999	-999	-999	-999	-999	-999	-999	-999	-999	-999
9/20/2014 12:00	2.9	146	18.8	38	0	806	-999	0.064	0.951	-999	-999	-999	-999	-999	-999	-999	-999	-999	-999	-999	-999	-999
9/20/2014 13:00	3.2	147	18.6	39	0	792	-999	0.084	1.172	-999	-999	-999	-999	-999	-999	-999	-999	-999	-999	-999	-999	-999
9/20/2014 14:00	3.3	152	18.2	41	0	720	-999	0.105	1.328	-999	-999	-999	-999	-999	-999	-999	-999	-999	-999	-999	-999	-999
9/20/2014 15:00	2.5	162	16.2	47	0	268	-999	0.072	1.583	-999	-999	-999	-999	-999	-999	-999	-999	-999	-999	-999	-999	-999
9/20/2014 16:00	2	154	16.3	45	0	374	-999	0.082	1.694	-999	-999	-999	-999	-999	-999	-999	-999	-999	-999	-999	-999	-999
9/20/2014 17:00	2.2	153	15.7	48	0	216	-999	0.035	1.873	-999	-999	-999	-999	-999	-999	-999	-999	-999	-999	-999	-999	-999
9/20/2014 18:00	1.5	215	12.9	61	0	26	-999	0.025	1.929	-999	-999	-999	-999	-999	-999	-999	-999	-999	-999	-999	-999	-999
9/20/2014 19:00	1.3	204	11.8	66	0	1	-999	-0.001	2.286	-999	-999	-999	-999	-999	-999	-999	-999	-999	-999	-999	-999	-999
9/20/2014 20:00	0.8	181	9.3	73	0	0	-999	0.017	2.148	-999	-999	-999	-999	-999	-999	-999	-999	-999	-999	-999	-999	-999
9/20/2014 21:00	1.4	235	7.6	76	0	0	-999	0.024	1.683	-999	-999	-999	-999	-999	-999	-999	-999	-999	-999	-999	-999	-999
9/20/2014 22:00	0.8	226	7.7	76	0	0	-999	0.032	1.933	-999	-999	-999	-999	-999	-999	-999	-999	-999	-999	-999	-999	-999
9/20/2014 23:00	0.6	282	8.2	77	0	0	-999	-0.003	2.025	-999	-999	-999	-999	-999	-999	-999	-999	-999	-999	-999	-999	-999
9/21/2014 0:00	0.6	266	8.8	77	0	0	-999	0.003	1.875	-999	-999	-999	-999	-999	-999	-999	-999	-999	-999	-999	-999	-999
9/21/2014 1:00	1	200	9.2	77	0	0	-999	0.001	2.432	-999	-999	-999	-999	-999	-999	-999	-999	-999	-999	-999	-999	-999
9/21/2014 2:00	1.8	192	8.5	83	0	0	-999	0.014	3.616	-999	-999	-999	-999	-999	-999	-999	-999	-999	-999	-999	-999	-999
9/21/2014 3:00	0.7	184	7.8	78	0	0	-999	0.019	1.99	-999	-999	-999	-999	-999	-999	-999	-999	-999	-999	-999	-999	-999
9/21/2014 4:00	0.4	255	5.9	85	0	0	-999	0.017	1.757	-999	-999	-999	-999	-999	-999	-999	-999	-999	-999	-999	-999	-999
9/21/2014 5:00	0.2	196	4.4	89	0	0	-999	-0.012	1.407	-999	-999	-999	-999	-999	-999	-999	-999	-999	-999	-999	-999	-999
9/21/2014 6:00	0.7	313	4.4	89	0	1	-999	-0.027	1.339	-999	-999	-999	-999	-999	-999	-999	-999	-999	-999	-999	-999	-999
9/21/2014 7:00	0.7	338	6.8	81	0	19	-999	0.04	1.547	-999	-999	-999	-999	-999	-999	-999	-999	-999	-999	-999	-999	-999
9/21/2014 8:00	0.1	67	8.6	77	0	98	-999	0.137	1.908	-999	-999	-999	-999	-999	-999	-999	-999	-999	-999	-999	-999	-999
9/21/2014 9:00	1.5	141	10	77	0	274	-999	0.189	2.79	-999	-999	-999	-999	-999	-999	-999	-999	-999	-999	-999	-999	-999
9/21/2014 10:00	1.7	131	12.3	67	0	646	-999	0.152	2.029	-999	-999	-999	-999	-999	-999	-999	-999	-999	-999	-999	-999	-999
9/21/2014 11:00	2.2	136	13.8	62	0	640	-999	0.192	1.959	-999	-999	-999	-999	-999	-999	-999	-999	-999	-999	-999	-999	-999
9/21/2014 12:00	2.3	147	13.4	62	0	496	-999	0.113	1.825	-999	-999	-999	-999	-999	-999	-999	-999	-999	-999	-999	-999	-999
9/21/2014 13:00	2.2	148	13.6	62	0	463	-999	0.125	2.051	-999	-999	-999	-999	-999	-999	-999	-999	-999	-999	-999	-999	-999
9/21/2014 14:00	1	162	13.1	64	0	281	-999	0.126	2.671	-999	-999	-999	-999	-999	-999	-999	-999	-999	-999	-999	-999	-999
9/21/2014 15:00	1.4	148	13.8	64	0	254	-999	0.081	2.653	-999	-999	-999	-999	-999	-999	-999	-999	-999	-999	-999	-999	-999
9/21/2014 16:00	0.8	146	13.5	66	0	101	-999	0.044	2.43	-999	-999	-999	-999	-999	-999	-999	-999	-999	-999	-999	-999	-999
9/21/2014 17:00	0.7	18	13.5	62	0	106	-999	0.035	0.749	-999	-999	-999	-999	-999	-999	-999	-999	-999	-999	-999	-999	-999
9/21/2014 18:00	0.2	278	12.4	65	0	16	-999	0.02	0.696	-999	-999	-999	-999	-999	-999	-999	-999	-999	-999	-999	-999	-999
9/21/2014 19:00	0.9	180	10.6	78	0	0	-999	-0.011	2.106	-999	-999	-999	-999	-999	-999	-999	-999	-999	-999	-999	-999	-999
9/21/2014 20:00	0.2	237	9.6	82	0	0	-999	0.003	2.163	-999	-999	-999	-999	-999	-999	-999	-999	-999	-999	-999	-999	-999
9/21/2014 21:00	0.7	252	7.4	88	0	0	-999	0.025	1.568	-999	-999	-999	-999	-999	-999	-999	-999	-999	-999	-999	-999	-999
9/21/2014 22:00	1.2	236	6.4	91	0	0	-999	0.016	1.384	-999	-999	-999	-999	-999	-999	-999	-999	-999	-999	-999	-999	-999
9/21/2014 23:00	1.3	252	6	91	0	0	-999	0.012	1.203	-999	-999	-999	-999	-999	-999	-999	-999	-999	-999	-999	-999	-999
9/22/2014 0:00	1.6	259	7.4	86	0	0	-999	-0.017	0.966	-999	-999	-999	-999	-999	-999	-999	-999	-999	-999	-999	-999	-999
9/22/2014 1:00	0.7	279	7.9	89	0.8	0	-999	-0.001	0.563	-999	-999	-999	-999	-999	-999	-999	-999	-999	-999	-999	-999	-999
9/22/2014 2:00	1.2	301	8.5	91	0	0	-999	-0.001	0.258	-999	-999	-999	-999	-999	-999	-999	-999	-999	-999	-999	-999	-999
9/22/2014 3:00	1.5	309	9.3	84	0	0	-999	-0.014	0.131	-999	-999	-999	-999	-999	-999	-999	-999	-999	-999	-999	-999	-999
9/22/2014 4:00	0.5	273	9.8	79	0	0	-999	-999	-999	-999	-999	-999	-999	-999	-999	-999	-999	-999	-999	-999	-999	-999
9/22/2014 5:00	0.3	322	9.1	85	0	0	-999	0.003	0.354	-999	-999	-999	-999	-999	-999	-999	-999	-999	-999	-999	-999	-999
9/22/2014 6:00	1.2	332	10	74	0.4	0	-999	-0.002	0.202	-999	-999	-999	-999	-999	-999	-999	-999	-999	-999	-999	-999	-999
9/22/2014 7:00	1	354	9	83	0	35	-999	0.018	0.282	-999	-999	-999	-999	-999	-999	-999	-999	-999	-999	-999	-999	-999
9/22/2014 8:00	2.5	26	11.1	71	0	174	-999	0.129	0.701	-999	-999	-999	-999	-999	-999	-999	-999	-999	-999	-999	-999	-999
9/22/2014 9:00	1.2	65	13.4	60	0	345	-999	0.131	0.629	-999	-999	-999	-999	-999	-999	-999	-999	-999	-999	-999	-999	-999
9/22/2014 10:00	0.7	31	14.7	54	0	413	-999	0.092	0.475	-999	-999	-999	-999	-999	-999	-999	-999	-999	-999	-999	-999	-999
9/22/2014 11:00	1.6	348	14.6	51	0.1	310	-999	0.066	0.4	-999	-999	-999	-999	-999	-999	-999	-999	-999	-999	-999	-999	-999
9/22/2014 12:00	2.2	354	10.4	75	1	248	-999	0.095	0.297	-999	-999	-999	-999	-999	-999	-999	-999	-999	-999	-999	-999	-999
9/22/2014 13:00	3	20	11.7	64	0.1	280	-999	0.041	0.321	-999	-999	-999	-999	-999	-999	-999	-999	-999	-999	-999	-999	-999
9/22/2014 14:00	3.1	17	13.1	56	0	369	-999	0.075	0.384	-999	-999	-999	-999	-999	-999	-999	-999	-999	-999	-999	-999	-999
9/22/2014 15:00	3.9	354	15.2	45	0	600	-999	0.066	0.318	-999	-999	-999	-999	-999	-999	-999	-999	-999	-999	-999	-999	-999
9/22/2014 16:00	3.8	10	14.5	48	0	339	-999	0.035	0.236	-999	-999	-999	-999	-999	-999	-999	-999	-999	-999	-999	-999	-999
9/22/2014 17:00	3.2	351	9.9	71	0.8	74	-999	0.072	0.405	-999	-999	-999	-999	-999	-999	-999	-999	-999	-999	-999	-999	-999
9/22/2014 18:00	2.2	347	8.3	77	0.2	32	-999	0.069	0.261	-999	-999	-999	-999	-999	-999	-999	-999	-999	-999	-999	-999	-999
9/22/2014 19:00	1.2	323	8.3	76	0	0	-999	0.031	0.312	-999	-999	-999	-999	-999	-999	-999	-999	-999	-999	-999	-999	-999
9/22/2014 20:00	1	332	9	73	0	0	-999	0.013	0.21	-999	-999	-999	-999	-999	-999	-999	-999	-999	-999	-999	-999	-999
9/22/2014 21:00	1	292	7.9	80	0	0	-999	0.017	0.171	-999	-999	-999	-999	-999	-999	-999	-999	-999	-999	-999	-999	-999
9/22/2014 22:00	1.3	350	8.6	72	0	0	-999	0.011	0.162	-999	-999	-999	-999	-999	-999	-999	-999	-999	-999	-999	-999	-999
9/22/2014 23:00	1.9	358	9.5	67	0.2	0	-999	-0.003	0.228	-999	-999	-999	-999	-999	-999	-999	-999	-999	-999	-999	-999	-999
9/23/2014 0:00	2.2	10	9.9	66	0	0	-999	-0.007	0.279	-999	-999	-999	-999	-999	-999	-999	-999	-999	-999	-999	-999	-999
9/23/2014 1:00	1.4	348	9.5	67	0	0	-999	-0.009	0.272	-999	-999	-999	-999	-999	-999	-999	-999	-999	-999	-999	-999	-999
9/23/2014 2:00	1.1	335	9	69	0	0	-999	-0.002	0.297	-999	-999	-999	-999	-999	-999	-999	-999	-999	-999	-999	-999	-999
9/23/2014 3:00	1.2	326	8.4	79	0.2	0	-999	0.02	0.276	-999	-999	-999	-999	-999	-999	-999	-999	-999	-999	-999	-999	-999
9/23/2014 4:00	1.2	336	9.3	69	0	0	-999	0.038	0.34	-999	-999	-999	-999	-999	-999	-999	-999	-999	-999	-999	-999	-999
9/23/2014 5:00	1.4	325	8.6	75	0.2	0	-999	0.002	0.28	-999	-999	-999	-999	-999	-999	-999	-999	-999	-999	-999	-999	-999
9/23/2014 6:00	1.7	340	9.2	67	0	1	-999	0.031	0.305	-999	-999	-999	-999	-999	-999	-999	-999	-999	-999	-999	-999	-999
9/23/2014 7:00	2.7	336	8.8	70	0.4	24	-999	0.035	0.394	-999	-999	-999	-999	-999	-999	-999	-999	-999	-999	-999	-999	-999
9/23/2014 8:00	3.1	271	11.6	58	0	302	-999	0.033	0.394	-999	-999	-999	-999	-999	-999	-999	-999	-999	-999	-999	-999	-999
9/23/2014 9:00	2.4	299	11.7	60	0.3	298	-999	0.014	0.404	-999	-999	-999	-999	-999	-999	-999	-999	-999	-999	-999	-999	-999
9/23/2014 10:00	2.4	4	11.3	59	0.1	153	-999	0.179	0.87	-999	-999	-999	-999	-999	-999	-999	-999	-999	-999	-999	-999	-999
9/23/2014 11:00	3.1	334	13.6	50	0	526	-999	0.115	0.687	-999	-999	-999	-999	-999	-999	-999	-999	-999	-999	-999	-999	-999
9/23/2014 12:00	4	320	13.9	52	0	723	-999	0.063	0.524	-999	-999	-999	-999	-999	-999	-999	-999	-999	-999	-999	-999	-999
9/23/2014 13:00	4.3	308	15.5	44	0	808	-999	0.108	0.66	-999	-999	-999	-999	-999	-999	-999	-999	-999	-999	-999	-999	-999
9/23/2014 14:00	3.3	323	15.8	45	0	729	-999	0.115	0.829	-999	-999	-999	-999	-999	-999	-999	-999	-999	-999	-999	-999	-999
9/23/2014 15:00	2.8	331	15	48	0	507	-999	0.124	0.932	-999	-999	-999	-999	-999	-999	-999	-999	-999	-999	-999	-999	-999
9/23/2014 16:00	2	334	14.7	48	0	250	-999	0.059	0.725	-999	-999	-999	-999	-999	-999	-999	-999	-999	-999	-999	-999	-999
9/23/2014 17:00	2	342	13.3	54	0	70	-999	0.083	0.889	-999	-999	-999	-999	-999	-999	-999	-999	-999	-999	-999	-999	-999
9/23/2014 18:00	1.6	323	12.8	53	0	15	-999	0.015	0.72	-999	-999	-999	-999	-999	-999	-999	-999	-999	-999	-999	-999	-999
9/23/2014 19:00	1.7	320	12.4	52	0	0	-999	-999	-999	-999	-999	-999	-999	-999	-999	-999	-999	-999	-999	-999	-999	-999
9/23/2014 20:00	1.3	322	11.4	55	0	0	-999	0.045	0.638	-999	-999	-999	-999	-999	-999	-999	-999	-999	-999	-999	-999	-999
9/23/2014 21:00	1.6	339	10.9	57	0	0	-999	0.014	0.549	-999	-999	-999	-999	-999	-999	-999	-999	-999	-999	-999	-999	-999
9/23/2014 22:00	1.7	337	11.3	56	0	0	-999	0.017	0.502	-999	-999	-999	-999	-999	-999	-999	-999	-999	-999	-999	-999	-999
9/23/2014 23:00	1.5	332	10.4	58	0	0	-999	0.003	0.448	-999	-999	-999	-999	-999	-999	-999	-999	-999	-999	-999	-999	-999
9/24/2014 0:00	1.3	326	9.8	58	0	0	-999	-0.006	0.424	-999	-999	-999	-999	-999	-999	-999	-999	-999	-999	-999	-999	-999
9/24/2014 1:00	1.1	329	8.9	59	0	0	-999	-0.025	0.377	-999	-999	-999	-999	-999	-999	-999	-999	-999	-999	-999	-999	-999
9/24/2014 2:00	1.1	290	5.6	72	0	0	-999	0.024	0.324	-999	-999	-999	-999	-999	-999	-999	-999	-999	-999	-999	-999	-999
9/24/2014 3:00	1	310	5	74	0	0	-999	-0.004	0.294	-999	-999	-999	-999	-999	-999	-999	-999	-999	-999	-999	-999	-999
9/24/2014 4:00	1.4	256	5.3	70	0	0	-999	-999	-999	-999	-999	-999	-999	-999	-999	-999	-999	-999	-999	-999	-999	-999
9/24/2014 5:00	1.6	295	5.9	68	0	0	-999	0.027	0.268	-999	-999	-999	-999	-999	-999	-999	-999	-999	-999	-999	-999	-999
9/24/2014 6:00	1.5	283	5.4	69	0	1	-999	-0.008	0.163	-999	-999	-999	-999	-999	-999	-999	-999	-999	-999	-999	-999	-999
9/24/2014 7:00	0.8	323	4.4	76	0	36	-999	-999	-999	-999	-999	-999	-999	-999	-999	-999	-999	-999	-999	-999	-999	-999
9/24/2014 8:00	0.5	3	11.2	54	0	273	-999	-999	-999	-999	-999	-999	-999	-999	-999	-999	-999	-999	-999	-999	-999	-999
9/24/2014 9:00	1.4	107	15.4	36	0	464	-999	0.089	0.583	-999	-999	-999	-999	-999	-999	-999	-999	-999	-999	-999	-999	-999
9/24/2014 10:00	1.1	82	16.7	33	0	621	-999	0.116	0.507	-999	-999	-999	-999	-999	-999	-999	-999	-999	-999	-999	-999	-999
9/24/2014 11:00	2	119	17.6	34	0	732	-999	0.079	0.532	-999	-999	-999	-999	-999	-999	-999	-999	-999	-999	-999	-999	-999
9/24/2014 12:00	2.4	147	18.2	37	0	839	-999	0.139	1.059	-999	-999	-999	-999	-999	-999	-999	-999	-999	-999	-999	-999	-999
9/24/2014 13:00	3	135	18.5	37	0	812	-999	0.157	1.728	-999	-999	-999	-999	-999	-999	-999	-999	-999	-999	-999	-999	-999
9/24/2014 14:00	3	131	18.5	39	0	687	-999	0.287	3.307	-999	-999	-999	-999	-999	-999	-999	-999	-999	-999	-999	-999	-999
9/24/2014 15:00	2.7	134	18.6	38	0	584	-999	0.697	5.966	-999	-999	-999	-999	-999	-999	-999	-999	-999	-999	-999	-999	-999
9/24/2014 16:00	2.5	144	18.1	38	0	309	-999	-999	-999	-999	-999	-999	-999	-999	-999	-999	-999	-999	-999	-999	-999	-999
9/24/2014 17:00	1.9	164	16.1	42	0	90	-999	0.141	4.077	-999	-999	-999	-999	-999	-999	-999	-999	-999	-999	-999	-999	-999
9/24/2014 18:00	1.7	221	12.8	53	0	12	-999	0.075	4.076	-999	-999	-999	-999	-999	-999	-999	-999	-999	-999	-999	-999	-999
9/24/2014 19:00	0.7	223	9.4	66	0	0	-999	0.045	4.057	-999	-999	-999	-999	-999	-999	-999	-999	-999	-999	-999	-999	-999
9/24/2014 20:00	0.5	268	8	70	0	0	-999	0.015	4.016	-999	-999	-999	-999	-999	-999	-999	-999	-999	-999	-999	-999	-999
9/24/2014 21:00	0.9	264	6.8	75	0	0	-999	0.001	3.472	-999	-999	-999	-999	-999	-999	-999	-999	-999	-999	-999	-999	-999
9/24/2014 22:00	0.7	263	6.1	76	0	0	-999	0.026	3.042	-999	-999	-999	-999	-999	-999	-999	-999	-999	-999	-999	-999	-999
9/24/2014 23:00	1.1	278	6.9	71	0	0	-999	0.027	2.647	-999	-999	-999	-999	-999	-999	-999	-999	-999	-999	-999	-999	-999
9/25/2014 0:00	1.1	320	7.6	67	0	0	-999	0	2.474	-999	-999	-999	-999	-999	-999	-999	-999	-999	-999	-999	-999	-999
9/25/2014 1:00	1.7	300	7.5	67	0	0	-999	0.025	2.103	-999	-999	-999	-999	-999	-999	-999	-999	-999	-999	-999	-999	-999
9/25/2014 2:00	1.8	303	7	69	0	0	-999	0.026	1.771	-999	-999	-999	-999	-999	-999	-999	-999	-999	-999	-999	-999	-999
9/25/2014 3:00	1.5	298	6.8	68	0	0	-999	-0.008	1.208	-999	-999	-999	-999	-999	-999	-999	-999	-999	-999	-999	-999	-999
9/25/2014 4:00	1.1	300	5.7	71	0	0	-999	0.031	0.731	-999	-999	-999	-999	-999	-999	-999	-999	-999	-999	-999	-999	-999
9/25/2014 5:00	1.4	304	5.7	71	0	0	-999	0.031	0.595	-999	-999	-999	-999	-999	-999	-999	-999	-999	-999	-999	-999	-999
9/25/2014 6:00	2.1	302	7	63	0	1	-999	0.066	0.423	-999	-999	-999	-999	-999	-999	-999	-999	-999	-999	-999	-999	-999
9/25/2014 7:00	1.1	327	6.2	68	0	32	-999	0.057	0.573	-999	-999	-999	-999	-999	-999	-999	-999	-999	-999	-999	-999	-999
9/25/2014 8:00	0.5	11	12.3	57	0	273	-999	0.378	1.676	-999	-999	-999	-999	-999	-999	-999	-999	-999	-999	-999	-999	-999
9/25/2014 9:00	0.8	106	17.6	36	0	465	-999	0.125	1.153	-999	-999	-999	-999	-999	-999	-999	-999	-999	-999	-999	-999	-999
9/25/2014 10:00	1	82	19.5	29	0	618	-999	0.039	0.562	-999	-999	-999	-999	-999	-999	-999	-999	-999	-999	-999	-999	-999
9/25/2014 11:00	2.1	126	20.5	30	0	723	-999	0.09	0.831	-999	-999	-999	-999	-999	-999	-999	-999	-999	-999	-999	-999	-999
9/25/2014 12:00	2.6	133	21	31	0	771	-999	0.14	1.713	-999	-999	-999	-999	-999	-999	-999	-999	-999	-999	-999	-999	-999
9/25/2014 13:00	2.8	136	21.5	30	0	764	-999	0.126	1.812	-999	-999	-999	-999	-999	-999	-999	-999	-999	-999	-999	-999	-999
9/25/2014 14:00	3.2	147	21	32	0	694	-999	0.185	2.336	-999	-999	-999	-999	-999	-999	-999	-999	-999	-999	-999	-999	-999
9/25/2014 15:00	3.5	139	20.5	33	0	570	-999	0.192	3.15	-999	-999	-999	-999	-999	-999	-999	-999	-999	-999	-999	-999	-999
9/25/2014 16:00	3	137	20.1	33	0	402	-999	0.329	5.097	-999	-999	-999	-999	-999	-999	-999	-999	-999	-999	-999	-999	-999
9/25/2014 17:00	2.2	147	18.8	34	0	186	-999	0.3	5.506	-999	-999	-999	-999	-999	-999	-999	-999	-999	-999	-999	-999	-999
9/25/2014 18:00	1.8	230	14.5	47	0	11	-999	0.087	4.552	-999	-999	-999	-999	-999	-999	-999	-999	-999	-999	-999	-999	-999
9/25/2014 19:00	0.5	281	11.3	57	0	0	-999	0.03	4.479	-999	-999	-999	-999	-999	-999	-999	-999	-999	-999	-999	-999	-999
9/25/2014 20:00	1.2	318	10.2	60	0	0	-999	0.027	3.993	-999	-999	-999	-999	-999	-999	-999	-999	-999	-999	-999	-999	-999
9/25/2014 21:00	1.4	329	10.3	58	0	0	-999	0.03	3.558	-999	-999	-999	-999	-999	-999	-999	-999	-999	-999	-999	-999	-999
9/25/2014 22:00	1.2	334	9.7	59	0	0	-999	0.012	3.395	-999	-999	-999	-999	-999	-999	-999	-999	-999	-999	-999	-999	-999
9/25/2014 23:00	1.1	323	9	62	0	0	-999	-0.007	2.605	-999	-999	-999	-999	-999	-999	-999	-999	-999	-999	-999	-999	-999
9/26/2014 0:00	1.3	299	8.8	62	0	0	-999	0.026	2.033	-999	-999	-999	-999	-999	-999	-999	-999	-999	-999	-999	-999	-999
9/26/2014 1:00	1.8	298	8.6	61	0	0	-999	0.012	0.964	-999	-999	-999	-999	-999	-999	-999	-999	-999	-999	-999	-999	-999
9/26/2014 2:00	1	314	7.5	65	0	0	-999	0.005	0.532	-999	-999	-999	-999	-999	-999	-999	-999	-999	-999	-999	-999	-999
9/26/2014 3:00	1.2	318	7.4	64	0	0	-999	0.027	0.547	-999	-999	-999	-999	-999	-999	-999	-999	-999	-999	-999	-999	-999
9/26/2014 4:00	2.1	295	9.5	55	0	0	-999	-999	-999	-999	-999	-999	-999	-999	-999	-999	-999	-999	-999	-999	-999	-999
9/26/2014 5:00	1.4	300	8.2	60	0	0	-999	0.027	0.384	-999	-999	-999	-999	-999	-999	-999	-999	-999	-999	-999	-999	-999
9/26/2014 6:00	1.3	289	6.7	68	0	1	-999	0.012	0.44	-999	-999	-999	-999	-999	-999	-999	-999	-999	-999	-999	-999	-999
9/26/2014 7:00	1.2	305	7	70	0	29	-999	-0.012	0.458	-999	-999	-999	-999	-999	-999	-999	-999	-999	-999	-999	-999	-999
9/26/2014 8:00	0.3	18	15.3	48	0	272	-999	0.402	2.16	-999	-999	-999	-999	-999	-999	-999	-999	-999	-999	-999	-999	-999
9/26/2014 9:00	1.5	46	19.9	32	0	460	-999	0.098	0.906	-999	-999	-999	-999	-999	-999	-999	-999	-999	-999	-999	-999	-999
9/26/2014 10:00	1.7	348	21.3	27	0	617	-999	0.08	0.635	-999	-999	-999	-999	-999	-999	-999	-999	-999	-999	-999	-999	-999
9/26/2014 11:00	1.6	315	21.9	25	0	750	-999	0.067	0.583	-999	-999	-999	-999	-999	-999	-999	-999	-999	-999	-999	-999	-999
9/26/2014 12:00	0.8	35	21.4	25	0	448	-999	0.043	0.521	-999	-999	-999	-999	-999	-999	-999	-999	-999	-999	-999	-999	-999
9/26/2014 13:00	2.4	126	20.4	32	0	365	-999	0.281	3.174	-999	-999	-999	-999	-999	-999	-999	-999	-999	-999	-999	-999	-999
9/26/2014 14:00	2.6	148	20.7	32	0	509	-999	0.109	2.211	-999	-999	-999	-999	-999	-999	-999	-999	-999	-999	-999	-999	-999
9/26/2014 15:00	2.3	140	20.9	30	0	567	-999	0.083	1.997	-999	-999	-999	-999	-999	-999	-999	-999	-999	-999	-999	-999	-999
9/26/2014 16:00	1.7	163	19.2	33	0	103	-999	0.046	2.007	-999	-999	-999	-999	-999	-999	-999	-999	-999	-999	-999	-999	-999
9/26/2014 17:00	1.5	137	18.4	34	0	65	-999	0.018	1.626	-999	-999	-999	-999	-999	-999	-999	-999	-999	-999	-999	-999	-999
9/26/2014 18:00	1.2	226	16	45	0	24	-999	0.026	1.814	-999	-999	-999	-999	-999	-999	-999	-999	-999	-999	-999	-999	-999
9/26/2014 19:00	0.6	245	13.2	54	0	0	-999	0.038	1.974	-999	-999	-999	-999	-999	-999	-999	-999	-999	-999	-999	-999	-999
9/26/2014 20:00	0.7	277	11.2	59	0	0	-999	0.035	2.178	-999	-999	-999	-999	-999	-999	-999	-999	-999	-999	-999	-999	-999
9/26/2014 21:00	0.9	329	10.4	61	0	0	-999	0.001	2.87	-999	-999	-999	-999	-999	-999	-999	-999	-999	-999	-999	-999	-999
9/26/2014 22:00	0.9	312	8.9	67	0	0	-999	0.053	2.787	-999	-999	-999	-999	-999	-999	-999	-999	-999	-999	-999	-999	-999
9/26/2014 23:00	1.2	338	9.1	64	0	0	-999	0.026	2.581	-999	-999	-999	-999	-999	-999	-999	-999	-999	-999	-999	-999	-999
9/27/2014 0:00	1.6	326	9.5	62	0	0	-999	-0.003	2.412	-999	-999	-999	-999	-999	-999	-999	-999	-999	-999	-999	-999	-999
9/27/2014 1:00	1.7	300	9.4	57	0	0	-999	-0.004	1.081	-999	-999	-999	-999	-999	-999	-999	-999	-999	-999	-999	-999	-999
9/27/2014 2:00	1.6	321	8.6	58	0	0	-999	0.013	0.771	-999	-999	-999	-999	-999	-999	-999	-999	-999	-999	-999	-999	-999
9/27/2014 3:00	1.5	306	8.3	58	0	0	-999	-0.021	0.602	-999	-999	-999	-999	-999	-999	-999	-999	-999	-999	-999	-999	-999
9/27/2014 4:00	1.8	319	9.1	53	0	0	-999	-0.007	0.562	-999	-999	-999	-999	-999	-999	-999	-999	-999	-999	-999	-999	-999
9/27/2014 5:00	1.3	337	6.6	63	0	0	-999	-0.008	0.559	-999	-999	-999	-999	-999	-999	-999	-999	-999	-999	-999	-999	-999
9/27/2014 6:00	1.1	330	6.4	64	0	1	-999	0.008	0.751	-999	-999	-999	-999	-999	-999	-999	-999	-999	-999	-999	-999	-999
9/27/2014 7:00	1.4	328	7.1	61	0	27	-999	0.037	0.784	-999	-999	-999	-999	-999	-999	-999	-999	-999	-999	-999	-999	-999
9/27/2014 8:00	0.7	354	13.9	51	0	271	-999	0.261	1.803	-999	-999	-999	-999	-999	-999	-999	-999	-999	-999	-999	-999	-999
9/27/2014 9:00	2.1	129	18.6	32	0	459	-999	0.177	1.61	-999	-999	-999	-999	-999	-999	-999	-999	-999	-999	-999	-999	-999
9/27/2014 10:00	2.3	126	19.5	29	0	609	-999	0.098	1.287	-999	-999	-999	-999	-999	-999	-999	-999	-999	-999	-999	-999	-999
9/27/2014 11:00	3	137	20.1	29	0	724	-999	0.091	1.536	-999	-999	-999	-999	-999	-999	-999	-999	-999	-999	-999	-999	-999
9/27/2014 12:00	3.3	132	19.9	31	0	772	-999	0.112	1.899	-999	-999	-999	-999	-999	-999	-999	-999	-999	-999	-999	-999	-999
9/27/2014 13:00	3.1	139	20.2	29	0	765	-999	0.111	1.541	-999	-999	-999	-999	-999	-999	-999	-999	-999	-999	-999	-999	-999
9/27/2014 14:00	3.6	137	19.6	31	0	695	-999	0.14	1.813	-999	-999	-999	-999	-999	-999	-999	-999	-999	-999	-999	-999	-999
9/27/2014 15:00	3.5	134	18.7	32	0	553	-999	0.141	2.385	-999	-999	-999	-999	-999	-999	-999	-999	-999	-999	-999	-999	-999
9/27/2014 16:00	3.3	132	17.9	34	0	378	-999	0.113	3.008	-999	-999	-999	-999	-999	-999	-999	-999	-999	-999	-999	-999	-999
9/27/2014 17:00	2.9	133	16.5	39	0	153	-999	0.083	4.769	-999	-999	-999	-999	-999	-999	-999	-999	-999	-999	-999	-999	-999
9/27/2014 18:00	1.3	150	14.3	43	0	17	-999	0.035	3.253	-999	-999	-999	-999	-999	-999	-999	-999	-999	-999	-999	-999	-999
9/27/2014 19:00	0.8	285	10	55	0	0	-999	0.023	2.29	-999	-999	-999	-999	-999	-999	-999	-999	-999	-999	-999	-999	-999
9/27/2014 20:00	1.2	293	8.5	53	0	0	-999	0.048	1.322	-999	-999	-999	-999	-999	-999	-999	-999	-999	-999	-999	-999	-999
9/27/2014 21:00	1	299	7.9	51	0	0	-999	0.021	1.055	-999	-999	-999	-999	-999	-999	-999	-999	-999	-999	-999	-999	-999
9/27/2014 22:00	1.4	324	8.6	49	0	0	-999	0.021	1.352	-999	-999	-999	-999	-999	-999	-999	-999	-999	-999	-999	-999	-999
9/27/2014 23:00	1.6	301	7.8	56	0	0	-999	0.019	1.444	-999	-999	-999	-999	-999	-999	-999	-999	-999	-999	-999	-999	-999
9/28/2014 0:00	1.7	291	7.4	58	0	0	-999	0.004	1.393	-999	-999	-999	-999	-999	-999	-999	-999	-999	-999	-999	-999	-999
9/28/2014 1:00	1.4	306	7	61	0	0	-999	-0.013	1.278	-999	-999	-999	-999	-999	-999	-999	-999	-999	-999	-999	-999	-999
9/28/2014 2:00	1.1	332	5.4	68	0	0	-999	0.005	1.3	-999	-999	-999	-999	-999	-999	-999	-999	-999	-999	-999	-999	-999
9/28/2014 3:00	0.7	317	4.8	72	0	0	-999	0.014	0.909	-999	-999	-999	-999	-999	-999	-999	-999	-999	-999	-999	-999	-999
9/28/2014 4:00	0.7	335	4.9	72	0	0	-999	-999	-999	-999	-999	-999	-999	-999	-999	-999	-999	-999	-999	-999	-999	-999
9/28/2014 5:00	1.4	299	5.4	72	0	0	-999	0.024	0.549	-999	-999	-999	-999	-999	-999	-999	-999	-999	-999	-999	-999	-999
9/28/2014 6:00	0.8	298	5.1	77	0	4	-999	0.014	0.582	-999	-999	-999	-999	-999	-999	-999	-999	-999	-999	-999	-999	-999
9/28/2014 7:00	0.3	307	7.8	78	0	47	-999	-999	-999	-999	-999	-999	-999	-999	-999	-999	-999	-999	-999	-999	-999	-999
9/28/2014 8:00	1.5	125	10.2	66	0	160	-999	0.086	1.114	-999	-999	-999	-999	-999	-999	-999	-999	-999	-999	-999	-999	-999
9/28/2014 9:00	1.4	134	9.8	67	0	226	-999	0.138	1.276	-999	-999	-999	-999	-999	-999	-999	-999	-999	-999	-999	-999	-999
9/28/2014 10:00	1	106	11.6	67	0	422	-999	0.085	1.331	-999	-999	-999	-999	-999	-999	-999	-999	-999	-999	-999	-999	-999
9/28/2014 11:00	2.2	142	13.9	60	0	703	-999	0.03	1.192	-999	-999	-999	-999	-999	-999	-999	-999	-999	-999	-999	-999	-999
9/28/2014 12:00	3.6	139	14.1	59	0	657	-999	0.062	1.591	-999	-999	-999	-999	-999	-999	-999	-999	-999	-999	-999	-999	-999
9/28/2014 13:00	3	154	12.8	66	0	300	-999	0.052	1.722	-999	-999	-999	-999	-999	-999	-999	-999	-999	-999	-999	-999	-999
9/28/2014 14:00	2.8	153	12.3	68	0	206	-999	0.048	1.693	-999	-999	-999	-999	-999	-999	-999	-999	-999	-999	-999	-999	-999
9/28/2014 15:00	1.1	175	10.8	78	4	52	-999	0.041	1.64	-999	-999	-999	-999	-999	-999	-999	-999	-999	-999	-999	-999	-999
9/28/2014 16:00	1.9	264	8.7	92	5.9	8	-999	0.035	1.107	-999	-999	-999	-999	-999	-999	-999	-999	-999	-999	-999	-999	-999
9/28/2014 17:00	0.6	283	8.4	91	0.7	107	-999	0.076	0.93	-999	-999	-999	-999	-999	-999	-999	-999	-999	-999	-999	-999	-999
9/28/2014 18:00	0.2	236	8.4	95	0	14	-999	0.019	0.815	-999	-999	-999	-999	-999	-999	-999	-999	-999	-999	-999	-999	-999
9/28/2014 19:00	0.4	270	6.9	96	0	0	-999	-0.005	0.58	-999	-999	-999	-999	-999	-999	-999	-999	-999	-999	-999	-999	-999
9/28/2014 20:00	0.6	273	5.3	96	0	0	-999	-0.017	0.585	-999	-999	-999	-999	-999	-999	-999	-999	-999	-999	-999	-999	-999
9/28/2014 21:00	0.8	236	4.8	96	0	0	-999	-0.016	0.64	-999	-999	-999	-999	-999	-999	-999	-999	-999	-999	-999	-999	-999
9/28/2014 22:00	1.6	209	6.9	94	0	0	-999	-0.028	0.736	-999	-999	-999	-999	-999	-999	-999	-999	-999	-999	-999	-999	-999
9/28/2014 23:00	1.3	194	7.4	95	0	0	-999	0.009	1.18	-999	-999	-999	-999	-999	-999	-999	-999	-999	-999	-999	-999	-999
9/29/2014 0:00	1.7	204	7.5	96	0	0	-999	-0.019	1.593	-999	-999	-999	-999	-999	-999	-999	-999	-999	-999	-999	-999	-999
9/29/2014 1:00	1.3	170	7.5	96	0	0	-999	0.013	1.446	-999	-999	-999	-999	-999	-999	-999	-999	-999	-999	-999	-999	-999
9/29/2014 2:00	0.8	162	7.4	96	0.4	0	-999	0.009	1.29	-999	-999	-999	-999	-999	-999	-999	-999	-999	-999	-999	-999	-999
9/29/2014 3:00	0.6	318	7	96	0.1	0	-999	0.02	1.097	-999	-999	-999	-999	-999	-999	-999	-999	-999	-999	-999	-999	-999
9/29/2014 4:00	1.3	359	5.7	96	0.4	0	-999	0.029	0.4	-999	-999	-999	-999	-999	-999	-999	-999	-999	-999	-999	-999	-999
9/29/2014 5:00	1.5	319	4.4	96	0	0	-999	-0.007	0.013	-999	-999	-999	-999	-999	-999	-999	-999	-999	-999	-999	-999	-999
9/29/2014 6:00	1.2	299	3.8	96	0	1	-999	0.001	0.071	-999	-999	-999	-999	-999	-999	-999	-999	-999	-999	-999	-999	-999
9/29/2014 7:00	0.3	285	3.8	96	0	32	-999	0.042	0.308	-999	-999	-999	-999	-999	-999	-999	-999	-999	-999	-999	-999	-999
9/29/2014 8:00	0.7	127	6	92	0	218	-999	0.273	0.687	-999	-999	-999	-999	-999	-999	-999	-999	-999	-999	-999	-999	-999
9/29/2014 9:00	1.5	145	5.9	93	0	159	-999	0.138	0.637	-999	-999	-999	-999	-999	-999	-999	-999	-999	-999	-999	-999	-999
9/29/2014 10:00	1.7	161	6.4	93	0	146	-999	0.135	0.861	-999	-999	-999	-999	-999	-999	-999	-999	-999	-999	-999	-999	-999
9/29/2014 11:00	1.9	146	7.2	90	0	250	-999	0.241	1.312	-999	-999	-999	-999	-999	-999	-999	-999	-999	-999	-999	-999	-999
9/29/2014 12:00	1.8	155	8.4	84	0	255	-999	0.157	1.005	-999	-999	-999	-999	-999	-999	-999	-999	-999	-999	-999	-999	-999
9/29/2014 13:00	3	142	8.4	83	1.7	245	-999	0.3	2.168	-999	-999	-999	-999	-999	-999	-999	-999	-999	-999	-999	-999	-999
9/29/2014 14:00	2.5	157	6.2	95	2	58	-999	0.208	2.492	-999	-999	-999	-999	-999	-999	-999	-999	-999	-999	-999	-999	-999
9/29/2014 15:00	0.3	150	6.2	94	0.6	117	-999	0.167	1.63	-999	-999	-999	-999	-999	-999	-999	-999	-999	-999	-999	-999	-999
9/29/2014 16:00	1.6	16	6	87	0	71	-999	0.085	0.708	-999	-999	-999	-999	-999	-999	-999	-999	-999	-999	-999	-999	-999
9/29/2014 17:00	1.1	355	5.2	90	0	27	-999	0.076	0.9	-999	-999	-999	-999	-999	-999	-999	-999	-999	-999	-999	-999	-999
9/29/2014 18:00	1.7	337	4.8	83	0	5	-999	0.073	0.461	-999	-999	-999	-999	-999	-999	-999	-999	-999	-999	-999	-999	-999
9/29/2014 19:00	1.3	334	4.7	77	0	0	-999	-0.018	0.435	-999	-999	-999	-999	-999	-999	-999	-999	-999	-999	-999	-999	-999
9/29/2014 20:00	2.2	340	4.3	77	0	0	-999	0.023	0.335	-999	-999	-999	-999	-999	-999	-999	-999	-999	-999	-999	-999	-999
9/29/2014 21:00	2.5	316	4.2	70	0	0	-999	0.027	0.161	-999	-999	-999	-999	-999	-999	-999	-999	-999	-999	-999	-999	-999
9/29/2014 22:00	3.2	308	4.6	61	0	0	-999	0.067	0.164	-999	-999	-999	-999	-999	-999	-999	-999	-999	-999	-999	-999	-999
9/29/2014 23:00	2.9	343	4.2	62	0	0	-999	0.039	0.187	-999	-999	-999	-999	-999	-999	-999	-999	-999	-999	-999	-999	-999
9/30/2014 0:00	3.4	321	4.5	58	0	0	-999	0.013	0.064	-999	-999	-999	-999	-999	-999	-999	-999	-999	-999	-999	-999	-999
9/30/2014 1:00	5.1	305	4.5	57	0	0	-999	0.001	0.098	-999	-999	-999	-999	-999	-999	-999	-999	-999	-999	-999	-999	-999
9/30/2014 2:00	5.2	305	4.4	55	0	0	-999	0.003	0.172	-999	-999	-999	-999	-999	-999	-999	-999	-999	-999	-999	-999	-999
9/30/2014 3:00	5.9	296	4.5	53	0	0	-999	0.006	0.265	-999	-999	-999	-999	-999	-999	-999	-999	-999	-999	-999	-999	-999
9/30/2014 4:00	7.1	289	4.8	50	0	0	-999	-999	-999	-999	-999	-999	-999	-999	-999	-999	-999	-999	-999	-999	-999	-999
9/30/2014 5:00	5.6	291	4.9	51	0	0	-999	0.009	0.231	-999	-999	-999	-999	-999	-999	-999	-999	-999	-999	-999	-999	-999
9/30/2014 6:00	3.4	278	4.3	52	0	1	-999	-0.024	0.239	-999	-999	-999	-999	-999	-999	-999	-999	-999	-999	-999	-999	-999
9/30/2014 7:00	3.2	315	4.2	53	0	38	-999	0.039	0.351	-999	-999	-999	-999	-999	-999	-999	-999	-999	-999	-999	-999	-999
9/30/2014 8:00	2.7	312	6.2	45	0	269	-999	0.1	0.447	-999	-999	-999	-999	-999	-999	-999	-999	-999	-999	-999	-999	-999
9/30/2014 9:00	4.2	291	7	44	0	463	-999	0.086	0.382	-999	-999	-999	-999	-999	-999	-999	-999	-999	-999	-999	-999	-999
9/30/2014 10:00	2.8	287	7.8	41	0	487	-999	0.066	0.297	-999	-999	-999	-999	-999	-999	-999	-999	-999	-999	-999	-999	-999
9/30/2014 11:00	4	296	6.2	44	0	161	-999	0.032	0.237	-999	-999	-999	-999	-999	-999	-999	-999	-999	-999	-999	-999	-999
9/30/2014 12:00	3.1	300	5.5	49	0	109	-999	0.062	0.408	-999	-999	-999	-999	-999	-999	-999	-999	-999	-999	-999	-999	-999
9/30/2014 13:00	2.1	310	6.7	48	0	232	-999	0.04	0.287	-999	-999	-999	-999	-999	-999	-999	-999	-999	-999	-999	-999	-999
9/30/2014 14:00	1.6	14	8.3	44	0	357	-999	0.03	0.303	-999	-999	-999	-999	-999	-999	-999	-999	-999	-999	-999	-999	-999
9/30/2014 15:00	1.6	38	7.3	53	0	153	-999	0.09	0.592	-999	-999	-999	-999	-999	-999	-999	-999	-999	-999	-999	-999	-999
9/30/2014 16:00	1.6	130	6.3	62	0	93	-999	0.065	0.558	-999	-999	-999	-999	-999	-999	-999	-999	-999	-999	-999	-999	-999
9/30/2014 17:00	0.4	105	5.1	72	0	71	-999	0.017	0.366	-999	-999	-999	-999	-999	-999	-999	-999	-999	-999	-999	-999	-999
9/30/2014 18:00	0.3	330	3.8	83	0.1	14	-999	-999	-999	-999	-999	-999	-999	-999	-999	-999	-999	-999	-999	-999	-999	-999
9/30/2014 19:00	1.5	322	3.7	76	0	0	-999	-0.021	0.255	-999	-999	-999	-999	-999	-999	-999	-999	-999	-999	-999	-999	-999
9/30/2014 20:00	2.8	305	4.4	64	0	0	-999	0.026	0.149	-999	-999	-999	-999	-999	-999	-999	-999	-999	-999	-999	-999	-999
9/30/2014 21:00	5.6	285	5.2	56	0	0	-999	0.027	0.135	-999	-999	-999	-999	-999	-999	-999	-999	-999	-999	-999	-999	-999
9/30/2014 22:00	2.6	322	4.5	62	0	0	-999	0.025	0.182	-999	-999	-999	-999	-999	-999	-999	-999	-999	-999	-999	-999	-999
9/30/2014 23:00	3.9	291	4.3	61	0	0	-999	-0.02	0.112	-999	-999	-999	-999	-999	-999	-999	-999	-999	-999	-999	-999	-999
10/1/2014 0:00	4	282	4.6	54	0	0	-999	-0.01	0.096	-999	-999	-999	-999	-999	-999	-999	-999	-999	-999	-999	-999	-999
10/1/2014 1:00	4.7	269	5.6	48	0	0	-999	0.019	0.17	-999	-999	-999	-999	-999	-999	-999	-999	-999	-999	-999	-999	-999
[truncated: 333 more rows]
