# Supplementary material for: Impact of Front Range sources on reactive nitrogen concentrations and deposition in Rocky Mountain National Park
Source: PeerJ. 2018 May 15;6:e4759. doi: 10.7717/peerj.4759 (PMC5958887; doi:10.7717/peerj.4759)
Supplement: Supplemental Information 3 [file peerj-06-4759-s003.xlsx]

## Sheet: Sheet2
	Sample Start	Sample End	NH4+	NO3-	Organic N	Precip Volume	Average pH
			mg N/m2	mg N/m2	mg N/m2	mm
2009	2009-07-01 14:57:00	2009-07-02 13:20:00	0.646633	1.01877	0.496331	0.814823	4.52333
2009	2009-07-02 13:20:00	2009-07-03 09:57:00	2.70841	4.23413	1.59949	13.5458	4.63667
2009	2009-07-04 09:00:00	2009-07-05 08:10:00	1.18192	2.20884	0.806065	9.2134	4.66667
2009	2009-07-10 13:38:00	2009-07-12 07:55:00	0.790841	2.18081	0.756709	1.35538	4.49333
2009	2009-07-12 07:55:00	2009-07-13 11:05:00	0.171691	0.178363	n.m	0.197726	4.23
2009	2009-07-17 12:15:00	2009-07-20 10:21:00	0.158067	0.175374	n.m	0.119592	n.m.
2009	2009-07-24 12:47:00	2009-07-27 11:00:00	2.19831	4.49547	1.90905	9.54666	4.52667
2009	2009-07-27 11:00:00	2009-07-28 12:00:00	1.5193	2.55404	1.28427	7.53592	4.55333
2009	2009-07-28 12:00:00	2009-07-29 14:00:00	0.733916	1.99006	1.01185	10.0537	4.47667
2009	2009-07-29 14:00:00	2009-07-30 13:58:00	1.14588	1.73021	0.758147	7.89151	4.53333
2009	2009-07-31 13:58:00	2009-08-01 15:00:00	0.190486	0.296837	0	1.12098	4.25333
2009	2009-08-05	2009-08-06 10:35:00	2.65885	3.43943	0.998798	5.09464	4.22
2009	2009-08-06 10:35:00	2009-08-07 12:18:00	0.540615	0.581008	0.334928	1.7907	4.54667
2009	2009-08-12 11:32:00	2009-08-14 12:30:00	0.209118	0.364576	0.22791	0.344426	4.07
2009	2009-08-14 12:30:00	2009-08-15 12:30:00	0.0688764	0.144317	0.0485114	0.430533	4.5525
2009	2009-08-15 12:30:00	2009-08-16 11:12:00	0.61105	1.20854	0.324853	1.47338	5.02333
2009	2009-08-17 10:50:00	2009-08-18 11:32:00	0.41757	1.51895	0.503212	0.744662	6.54
2009	2009-08-18 11:32:00	2009-08-19 10:48:00	0.0541993	0.0866135	n.m	0.0861065	n.m.
2009	2009-08-21 11:00:00	2009-08-24 10:14:00	0.0496101	0.0601201	0.033227	0.0621881	4.40333
2009	2009-08-24 10:14:00	2009-08-26 09:40:00	1.38144	3.04053	0.84754	4.94953	4.66333
2009	2009-08-26 09:40:00	2009-08-27 09:47:00	0.194746	0.182486	0.0820546	0.53099	4.75
2009	2009-08-28 12:03:00	2009-08-31 09:40:00	0.627084	0.681301	0.437811	0.2934	n.m.
2009	2009-09-02 10:50:00	2009-09-03 11:00:00	0	0	0	0.011162	n.m.
2009	2009-09-04 10:33:00	2009-09-07 13:03:00	0.498435	0.673236	0.401729	0.663339	n.m.
2009	2009-09-07 13:03:00	2009-09-09 14:31:00	0.827993	1.74838	0.377603	1.65356	5.06125
2009	2009-09-11 14:33:00	2009-09-13 12:18:00	1.79471	3.0854	1.06878	5.78987	4.8475
2009	2009-09-13 12:18:00	2009-09-14 10:07:00	0.360889	0.674049	0.228932	1.38727	4.61667
2009	2009-09-18 14:08:00	2009-09-21 10:52:00	0.707721	1.58149	1.08686	9.73801	5.304
2009	2009-09-21 10:52:00	2009-09-22 11:34:00	0.0437118	0.0662908	0.305636	0.403425	n.m.
2009	2009-09-22 11:34:00	2009-09-23 09:52:00	0.126079	0.223866	0.0708773	1.34262	4.62
2009	2009-09-23 09:52:00	2009-09-24 09:25:00	0.288974	0.266857	0.0558643	0.325291	n.m.
2009	2009-09-30 11:35:00	2009-10-01 09:35:00	0.926337	0.930625	0.939509	2.37431	7.04667
2009	2009-10-02 11:10:00	2009-10-05 09:58:00	1.46779	2.44496	0.727932	3.70099	5.90667
2009	2009-10-05 09:58:00	2009-10-06 09:45:00	0.291357	0.31283	0.245572	0.782932	6.73
2009	2009-10-07 12:00:00	2009-10-08 15:20:00	1.15611	1.58419	2.3244	5.3689	4.74333
2009	2009-10-08 15:20:00	2009-10-09 12:30:00	0.231138	0.211359	0	0.347615	5.13667
2009	2009-10-09 12:30:00	2009-10-10 12:15:00	2.51394	4.1116	4.33759	5.23177	6.32
2009	2009-10-10 12:15:00	2009-10-12 10:00:00	3.17859	2.41233	0.177299	1.79229	5.6875
2009	2009-10-12 10:00:00	2009-10-15 09:35:00	0.515751	0.468156	0	4.57481	4.82
2009	2009-10-16 13:35:00	2009-10-19 10:24:00	0.0308883	0.0303573	n.m	0.0988631	n.m.
2009	2009-10-19 10:24:00	2009-10-21 11:35:00	2.58203	2.82421	0.0550092	7.32862	4.52667
2009	2009-10-23 12:05:00	2009-10-25 15:30:00	0.195609	0.394804	0	3.22262	5.16667
2009	2009-10-26 10:30:00	2009-10-28 13:00:00	0.775205	0.994519	4.6311	12.8347	4.42
2009	2009-10-28 13:00:00	2009-10-29 12:00:00	0.365115	0.126321	0.0357429	5.42631	5.05
2009	2009-10-29 12:00:00	2009-10-30 12:30:00	0.00100286	0.000874433	0	0.0239185	4.41
2010	2010-06-30 12:50:00	2010-07-02 10:34:00	2.26925	2.17076	0.826833	3.58777	4.23664
2010	2010-07-02 10:34:00	2010-07-05 10:56:00	0.731632	0.63527	0.313426	0.668123	4.62664
2010	2010-07-05 10:56:00	2010-07-07 11:07:00	1.52829	0.64357	0.280774	3.21783	5.33323
2010	2010-07-07 11:09:00	2010-07-08 09:35:00	4.60217	4.0809	0.411699	18.9514	4.66331
2010	2010-07-08 09:35:00	2010-07-09 12:42:00	0	0	0	5.11856	4.65664
2010	2010-07-16 11:10:00	2010-07-19 11:50:00	0.99628	0.961019	0.154435	1.29	4.58634
2010	2010-07-19 11:50:00	2010-07-20 11:08:00	1.4168	0.896183	0.313692	3.32786	4.71977
2010	2010-07-20 11:08:00	2010-07-21 11:58:00	2.11842	2.22946	0	1.38568	4.89315
2010	2010-07-28 11:41:00	2010-07-29 10:38:00	7.80437	6.87157	0.871975	33.639	4.65992
2010	2010-07-29 10:38:00	2010-07-30 11:10:00	0.396104	0.564154	0.264742	3.96568	4.85323
2010	2010-07-30 11:10:00	2010-07-31 12:42:00	1.16802	0.958953	0.394783	4.64497	4.75649
2010	2010-07-31 12:42:00	2010-08-02 12:30:00	3.21102	2.93701	1.04922	11.457	4.49331
2010	2010-08-02 12:30:00	2010-08-03 09:50:00	2.6611	2.50227	0.360616	16.9917	4.66
2010	2010-08-03 09:50:00	2010-08-04 11:55:00	4.2031	3.23347	0.302041	18.7967	4.57323
2010	2010-08-04 11:55:00	2010-08-05 10:15:00	3.96396	3.32428	0.052278	19.8715	4.55618
2010	2010-08-06 11:43:00	2010-08-08 12:40:00	0.0841083	0.130647	0.0220716	0.344426	4.28558
2010	2010-08-08 12:40:00	2010-08-09 11:18:00	0.106787	0.115166	0.021722	0.945577	4.46331
2010	2010-08-09 11:18:00	2010-08-10 11:25:00	1.12117	1.20915	0.228063	9.92777	4.65664
2010	2010-08-11 11:25:00	2010-08-12 10:55:00	0.0703081	0.0651764	0.0315075	0.34921	4.80664
2010	2010-08-16 09:59:00	2010-08-17	0.0489941	0.0416719	0	0.0605935	n.m.
2010	2010-08-20 11:30:00	2010-08-23 17:00:00	0.190689	0.171857	0	0.210483	n.m.
2010	2010-09-08 10:45:00	2010-09-10 10:58:00	0.55851	0.510628	0.211723	1.9948	4.64331
2010	2010-09-19 12:10:00	2010-09-22 12:00:00	0.609518	0.629081	0.0919886	0.723933	4.69992
2010	2010-09-22 12:00:00	2010-09-23 10:24:00	0.374223	0.35999	0.135269	2.42533	4.80331
2014	2014-07-07 15:30:00	2014-07-09 10:20:00	2.13935	0.650098	0.684888	2.3	5.55332
2014	2014-07-09 10:20:00	2014-07-10 10:40:00	1.99696	0.747663	0.201782	2.88	5.40368
2014	2014-07-10 10:40:00	2014-07-11 12:26:00	0.0775856	0.0701081	n.m.	0.1	n.m.
2014	2014-07-11 12:26:00	2014-07-14 12:30:00	3.35656	2.02136	0.193289	11.67	5.86297
2014	2014-07-14 12:30:00	2014-07-16 10:35:00	2.61594	0.9793	0.122161	3.77	3.83735
2014	2014-07-16 10:35:00	2014-07-17 12:55:00	3.64597	1.35181	0.412302	5.04	4.84333
2014	2014-07-17 12:55:00	2014-07-18 12:28:00	0.295673	0.0845442	0.0744171	0.72	4.7196
2014	2014-07-18 13:30:00	2014-07-21 11:44:00	1.43713	0.916676	0.39328	1.22	4.87639
2014	2014-07-23	2014-07-25 12:50:00	2.60652	1.96917	0.439633	10.61	5.61318
2014	2014-07-25 12:50:00	2014-07-28 12:20:00	14.4158	5.48998	1.08422	20.91	6.12331
2014	2014-07-28 12:20:00	2014-07-30 11:23:00	11.5959	8.17812	0	60.7	4.97666
2014	2014-07-30 11:23:00	2014-08-01 11:33:00	0.103396	1.09444	0	13.38	5.12327
2014	2014-08-04 11:22:00	2014-08-06 14:05:00	3.26034	3.34695	0	9.85	4.9666
2014	2014-08-06 14:05:00	2014-08-08 11:30:00	n.m.	n.m.	n.m.	0	n.m.
2014	2014-08-08 11:10:00	2014-08-11 13:40:00	2.66635	1.27649	0.135711	8.63	4.97295
2014	2014-08-13 11:15:00	2014-08-15 11:20:00	1.1744	1.22833	0.0260834	4.55	5.2098
2014	2014-08-15 11:20:00	2014-08-18 11:40:00	0.790249	0.563349	0	1.77	5.5226
2014	2014-08-18 11:40:00	2014-08-20 12:50:00	0.218648	0.242309	0	0.19	n.m.
2014	2014-08-20 12:50:00	2014-08-22 11:20:00	0.0991267	0.125	0	0.09	n.m.
2014	2014-08-22 11:20:00	2014-08-25 12:03:00	1.2891	1.47582	0	4.57	4.82665
2014	2014-08-25 12:03:00	2014-08-27 11:30:00	0.697994	1.21611	0	3.48	4.55664
2014	2014-08-27 11:30:00	2014-08-29 11:15:00	0.035419	0.332463	0	3.38	5.04332
2014	2014-08-29 11:15:00	2014-09-01 11:45:00	5.43145	3.85056	0	17.3	4.83321
2014	2014-09-01 11:40:00	2014-09-03 12:05:00	n.m.	n.m.	n.m.	0	n.m.
2014	2014-09-03 12:05:00	2014-09-05 13:00:00	6.18744	2.49554	0.0331213	6.66	6.07328
2014	2014-09-05 13:00:00	2014-09-08 10:30:00	1.30144	1.66335	0	3.86	5.05157
2014	2014-09-08 10:30:00	2014-09-10 13:00:00	1.05922	0.589092	0	8.97	5.39258
2014	2014-09-10 13:00:00	2014-09-12 12:00:00	2.04	1.18889	0	5.81	5.03997
2014	2014-09-12 12:00:00	2014-09-15 13:00:00	0.407083	0.353894	0.026391	0.6	4.81997
2014	2014-09-15 13:00:00	2014-09-17 10:15:00	n.m.	n.m.	n.m.	0	n.m.
2014	2014-09-17 10:15:00	2014-09-19 10:58:00	n.m.	n.m.	n.m.	0	n.m.
2014	2014-09-19 10:58:00	2014-09-22 11:40:00	0.140021	0.132728	0	1.63	5.29992
2014	2014-09-22 11:40:00	2014-09-24 14:10:00	0.764657	0.575299	0	3.79	5.09659
2014	2014-09-24 14:10:00	2014-09-26 09:29:00	n.m.	n.m.	n.m.	0	n.m.
2014	2014-09-26 09:29:00	2014-09-29 11:25:00	11.6497	3.33544	0.171499	13.37	5.73922
2014	2014-09-29 11:25:00	2014-10-01 11:30:00	0.984813	0.800047	0	5.11	5.01326
2015	2015-07-01 14:17:00	2015-07-03 09:37:00	0.470424	0.23309	0.275637	1.24695	4.56972
2015	2015-07-03 09:37:00	2015-07-06 12:21:00	3.87018	1.07782	0	5.94773	4.65236
2015	2015-07-06 12:21:00	2015-07-08 11:45:00	1.21095	1.05122	5.67919	18.2434	4.7633
2015	2015-07-08 11:45:00	2015-07-10 09:50:00	2.67026	1.99486	4.53103	29.1104	4.74995
2015	2015-07-13 11:41:00	2015-07-15 12:07:00	1.52804	1.14242	0	2.08729	4.75995
2015	2015-07-20 12:00:00	2015-07-22 10:00:00				0.446478	5.96324
2015	2015-07-31 11:49:00	2015-08-03 12:05:00	3.87922	1.42158	0	1.7014	5.32982
2015	2015-08-10 11:55:00	2015-08-12 11:25:00	3.0715	1.4656	0.120897	4.71194	4.55999
2015	2015-08-12 11:25:00	2015-08-14 11:30:00	0.194944	0.370811	0.134251	0.982252	4.45997
2015	2015-08-14 11:30:00	2015-08-17 11:21:00	4.94257	3.72334	0	9.19267	4.67293
2015	2015-08-17 11:21:00	2015-08-19 11:21:00	2.47801	0.866062	0.297455	2.63901	5.38999
2015	2015-08-26 11:10:00	2015-08-28 08:59:00	0.383947	0.275391	0.0247825	0.629853	4.58664
2015	2015-08-28 08:59:00	2015-08-31 10:30:00	0.239687	0.186904	n.m.	0.272671	4.04333
2015	2015-09-02 10:16:00	2015-09-04 10:40:00	1.00094	1.23826	0.284456	5.73246	4.40329
2015	2015-09-04 10:40:00	2015-09-07 12:23:00	0.439337	0.606405	0.0176694	0.479964	4.30332
2015	2015-09-07 12:23:00	2015-09-09 10:30:00	0.0930802	0.0607973	n.m.	0.427344	5.20331
2015	2015-09-14 10:55:00	2015-09-16 11:15:00	0.0654415	0.026568	n.m.	0.133944	n.m.
2015	2015-09-16 11:15:00	2015-09-18 10:38:00	0.492547	0.312706	0.0908626	1.91188	4.6589
2015	2015-09-28 11:53:00	2015-09-30 10:55:00	0.59367	0.634342	0.0570774	0.848309	4.70665
2015	2015-09-30 10:55:00	2015-10-02 10:46:00	0.436467	0.296843	n.m.	0.797283	5.64663
2015	2015-10-02 10:46:00	2015-10-05 10:25:00	2.31041	2.47698	0.925763	5.43906	4.63999
2015	2015-10-05 10:25:00	2015-10-07 10:58:00	5.43295	2.91196	0	24.2789	4.75995
2015	2015-10-07 10:58:00	2015-10-07 10:38:00	1.15417	0.400858	0	1.06039	6.23331
2016	2016-07-01 11:33:00	2016-07-04 09:00:00	0.365273	0.365136	0.0775931	1.60413	n.m.
2016	2016-07-04 09:00:00	2016-07-06 12:13:00	0.238877	0.0361615	0	0.196132	5.27987
2016	2016-07-18 10:15:00	2016-07-20 10:50:00	0.316508	0.146869	0.133349	0.625761	5.97542
2016	2016-07-20 10:50:00	2016-07-22 12:00:00	1.50244	0.981842	0.110377	1.59377	4.88656
2016	2016-07-29 12:05:00	2016-08-01 10:13:00	1.44251	0.812507	0.171339	2.65495	4.41634
2016	2016-08-01 10:13:00	2016-08-03 12:03:00	1.17353	0.601463	0.2783	0.998198	n.m.
2016	2016-08-03 12:03:00	2016-08-05 10:47:00	2.13341	1.5151	0.644909	2.07612	4.63664
2016	2016-08-05 10:47:00	2016-08-08 10:26:00	1.28043	0.995237	0.105717	4.65932	5.47634
2016	2016-08-08 10:26:00	2016-08-10 12:10:00	0.74887	1.09	0.238001	0.99182	n.m.
2016	2016-08-10 12:10:00	2016-08-12 09:46:00	0.381309	0.578984	0.0806729	1.53716	4.62331
2016	2016-08-15 10:25:00	2016-08-17 11:09:00	0.437072	0.342126	0	0.251144	n.m.
2016	2016-08-17 11:09:00	2016-08-19 10:48:00	4.09285	1.81327	0.406604	9.79932	4.43664
2016	2016-08-19 10:48:00	2016-08-22 10:32:00	0.981987	0.469776	0.25144	2.13193	5.86625
2016	2016-08-22 10:32:00	2016-08-26 12:28:00	6.80293	2.69689	0	6.73305	5.23969
2016	2016-08-26 12:28:00	2016-08-29 11:00:00	0.742211	0.596928	0.228032	1.25173	5.81625
2016	2016-08-29 11:00:00	2016-08-31 12:20:00	10.4689	2.63498	0	8.80429	6.17269
2016	2016-08-31 12:20:00	2016-09-02 10:40:00	0.0379685	0.0272291	0	0.189753	n.m.
2016	2016-09-02 10:40:00	2016-09-05 11:55:00	0.632491	0.650851	0.152461	4.15934	4.84664
2016	2016-09-12 10:32:00	2016-09-14 12:13:00	15.2869	3.426	0	13.0299	6.28285
2016	2016-09-14 12:13:00	2016-09-16 14:00:00	0.701976	0.631356	0.0775508	2.34561	5.02946
2016	2016-09-23 10:11:00	2016-09-26 13:16:00	0.552349	0.425456	0.0686478	1.2916	5.77969
2016	2016-09-28 12:13:00	2016-09-30 11:05:00	0.600476	0.211515	0.0319622	1.37452	5.06908
2016	2016-09-30 11:05:00	2016-10-03 11:25:00	0.0248553	0.0407475	0.027493	0.532585	5.36151
2016	2016-10-03 11:25:00	2016-10-05 10:45:00	0.121572	0.0978657	0	0.2934	5.45664
2016	2016-10-05 10:45:00	2016-10-07 10:50:00	1.34357	1.67586	0	3.66591	5.63331
2016	2016-10-10 11:40:00	2016-10-12 12:12:00	3.49287	3.19777	0.168082	14.0807	4.94498
